# Supplementary material
Source: Research Square preprint supplement (doi:10.21203/rs.3.rs-10142139/v1)
Supplement: Supplementary file 1 [file 2d4d55d7a243fba045d99b82.xlsx]

## Sheet: All Data
Table S5 LA-ICP-MS zircon U–Pb data
Sample	U (ppm)	Th (ppm)	Th/U	207Pb/206Pb	1σ	207Pb/235U	1σ	206Pb/238U	1σ	207Pb/206Pb age (Ma)	1σ	207Pb/235U age (Ma)	1σ	206Pb/238U age (Ma)	1σ	Concordance (%)
LZX@01	246.03	199.79	0.812055	0.06536	0.0017	1.10424	0.02641	0.12289	0.00099	785.9	53.61	755.4	12.74	747.2	5.66	98.9145
LZX@02	184.4	112.48	0.609978	0.06473	0.00139	1.0938	0.02096	0.12292	0.00084	765.5	44.55	750.3	10.17	747.3	4.8	99.6002
LZX@03	265.65	216.04	0.813251	0.07079	0.00229	1.19512	0.03629	0.12279	0.00124	951.5	64.72	798.3	16.79	746.6	7.1	93.5237
LZX@04	260.63	302.48	1.16057	0.06292	0.00272	1.06447	0.04404	0.12304	0.00155	705.6	89.25	736	21.66	748	8.91	101.63
LZX@05	187.44	197.02	1.05111	0.06228	0.00125	1.055	0.01873	0.1232	0.00079	683.7	42.34	731.4	9.26	749	4.53	102.406
LZX@06	283.65	230.08	0.81114	0.06283	0.00122	1.06403	0.01803	0.12316	0.00077	702.6	40.65	735.8	8.87	748.7	4.41	101.753
LZX@07	207.41	234.22	1.12926	0.0628	0.00114	1.06218	0.01661	0.12301	0.00073	701.3	38.16	734.9	8.18	747.9	4.19	101.769
LZX@08	139.05	102.55	0.737504	0.06921	0.00123	1.17674	0.01792	0.12365	0.00074	904.9	36.24	789.8	8.36	751.5	4.27	95.1507
LZX@09	159.23	185.71	1.1663	0.06324	0.00274	1.07496	0.04463	0.12361	0.00158	716.2	89.37	741.2	21.84	751.3	9.05	101.363
LZX@10	155.93	93.99	0.60277	0.06476	0.0019	1.09671	0.03003	0.12315	0.00111	766.5	60.51	751.8	14.54	748.6	6.35	99.5744
LZX@11	185.14	201.54	1.08858	0.0645	0.00143	1.09125	0.02189	0.12301	0.00087	758.1	46.11	749.1	10.63	747.8	5	99.8265
LZX@12	264.76	253.3	0.956716	0.06349	0.00216	1.07402	0.03462	0.12299	0.00126	724.7	70.54	740.7	16.95	747.8	7.24	100.959
LZX@13	181.62	172.23	0.948299	0.0633	0.00139	1.07231	0.02137	0.12315	0.00086	718.5	46.1	739.9	10.47	748.7	4.96	101.189
LZX@14	252.5	228.16	0.903604	0.06285	0.00103	1.06647	0.01461	0.12337	0.00069	703.1	34.34	737	7.18	749.9	3.94	101.75
LZX@15	153.64	149.62	0.973835	0.0649	0.00376	1.0969	0.06152	0.12288	0.00212	771	117.58	751.8	29.79	747.1	12.15	99.3748
LZX@16	235.75	183.77	0.779512	0.06308	0.001	1.06786	0.01401	0.12307	0.00067	710.9	33.19	737.7	6.88	748.2	3.86	101.423
LZX@17	151.61	132.27	0.872436	0.06328	0.00343	1.07285	0.05621	0.12324	0.00197	717.8	111.13	740.1	27.53	749.2	11.31	101.23
LZX@18	210.82	249.52	1.18357	0.06067	0.00132	1.02635	0.02022	0.12298	0.00085	627.6	46.21	717.1	10.13	747.7	4.87	104.267
LZX@19	276.45	230.03	0.832085	0.06277	0.00278	1.06079	0.04506	0.12286	0.00161	700.3	91.46	734.2	22.2	747	9.26	101.743
LZX@20	337.43	344.71	1.02157	0.06158	0.00091	1.0405	0.01245	0.12283	0.00064	659.4	31.25	724.2	6.19	746.9	3.67	103.134
WJG@01	107.29	76.07	0.709013	0.06254	0.00248	1.01569	0.03844	0.1178	0.00137	692.5	82.31	711.7	19.36	717.9	7.89	100.871
WJG@02	255.95	232.86	0.909787	0.06066	0.00431	0.97375	0.06723	0.11642	0.00233	627.1	146.21	690.4	34.59	709.9	13.46	102.824
WJG@03	175.05	190.59	1.08877	0.06257	0.00209	1.02	0.03223	0.1182	0.00117	693.7	69.68	713.9	16.2	720.2	6.75	100.882
WJG@04	145.64	146.32	1.00467	0.06364	0.00131	1.03627	0.01902	0.11807	0.00077	729.5	43.15	722.1	9.49	719.4	4.47	99.6261
WJG@05	146.89	145.52	0.990673	0.06235	0.00138	1.01432	0.02031	0.11793	0.00082	686.3	46.69	711.1	10.24	718.6	4.71	101.055
WJG@06	200.69	146.66	0.730779	0.06253	0.00133	1.01672	0.01937	0.11786	0.00079	692.4	44.74	712.3	9.75	718.2	4.54	100.828
WJG@07	213.75	207.76	0.971977	0.06202	0.00323	1.00596	0.05057	0.11756	0.00176	674.9	107.64	706.8	25.6	716.5	10.18	101.372
WJG@08	104.85	127.08	1.21202	0.06303	0.00347	1.02608	0.05451	0.11798	0.00188	709.4	112.8	717	27.32	718.9	10.84	100.265
WJG@09	288.88	263.47	0.91204	0.06342	0.0014	1.03239	0.02057	0.11796	0.00081	722.5	46.23	720.1	10.28	718.8	4.7	99.8195
WJG@10	202.19	198.53	0.981898	0.06338	0.00131	1.0318	0.019	0.11797	0.00077	721	43.34	719.8	9.5	718.8	4.45	99.8611
WJG@11	218.72	225.95	1.03306	0.06318	0.0011	1.02678	0.0152	0.11773	0.00067	714.2	36.57	717.3	7.61	717.5	3.84	100.028
WJG@12	294.27	277.41	0.942706	0.06261	0.00371	1.01088	0.05803	0.11695	0.002	695.1	121.59	709.3	29.3	713	11.52	100.522
WJG@13	158.2	129.24	0.816941	0.06246	0.0017	1.01845	0.02571	0.11811	0.00097	689.8	56.98	713.1	12.93	719.7	5.58	100.926
WJG@14	196.5	370.26	1.88427	0.06373	0.0013	1.03764	0.01872	0.11792	0.00076	732.8	42.55	722.7	9.33	718.6	4.37	99.4327
WJG@15	362.36	476.47	1.31491	0.06379	0.00162	1.03921	0.02432	0.11798	0.00092	734.7	52.95	723.5	12.11	718.9	5.28	99.3642
WJG@16	113.74	125.71	1.10524	0.06303	0.00253	1.02918	0.03955	0.11823	0.00139	709.4	83.26	718.5	19.79	720.4	8.03	100.264
WJG@17	183.63	179.63	0.978217	0.06263	0.00222	1.02288	0.03435	0.11826	0.00123	695.8	73.66	715.4	17.24	720.5	7.09	100.713
WJG@18	329.43	434.43	1.31873	0.07066	0.00109	1.02889	0.01279	0.10543	0.00055	947.7	31.2	718.4	6.4	646.1	3.21	89.936
WJG@19	215.11	261.1	1.2138	0.06352	0.00109	1.03591	0.015	0.11807	0.00066	725.8	35.9	721.9	7.48	719.5	3.78	99.6675
WJG@20	132.96	153.27	1.15275	0.06331	0.0027	1.03561	0.04226	0.11843	0.00147	718.7	87.91	721.7	21.08	721.5	8.49	99.9723
KYX@01	129.38	115.23	0.890632	0.06177	0.00261	0.9668	0.03907	0.1135	0.0014	666.2	87.86	686.8	20.17	693.1	8.08	100.917
KYX@02	149.3	139.3	0.933021	0.06245	0.00343	0.97764	0.05184	0.11353	0.0018	689.5	112.98	692.4	26.62	693.2	10.43	100.116
KYX@03	198	227.94	1.15121	0.06245	0.00244	0.97491	0.03634	0.11322	0.0013	689.5	81.18	691	18.68	691.4	7.55	100.058
KYX@04	119.86	148.56	1.23945	0.06041	0.00195	0.94362	0.0287	0.11329	0.00108	618.1	68.02	674.8	14.99	691.8	6.25	102.519
KYX@05	255.99	315.76	1.23349	0.06246	0.00175	0.97811	0.02556	0.11357	0.00097	689.8	58.62	692.6	13.12	693.5	5.63	100.13
KYX@06	124.36	141.13	1.13485	0.06359	0.00171	0.9932	0.02475	0.11327	0.00094	728.1	55.85	700.4	12.61	691.7	5.45	98.7579
KYX@07	341.65	58.82	0.172164	0.05148	0.00118	0.30369	0.00635	0.04279	0.00028	262.2	51.81	269.3	4.94	270.1	1.72	100.297
KYX@08	229.28	187.56	0.818039	0.06203	0.00375	0.9648	0.05649	0.11281	0.00197	675	124.33	685.8	29.19	689.1	11.43	100.481
KYX@09	112.99	118.79	1.05133	0.06773	0.00493	1.06971	0.07541	0.11456	0.0025	860.2	144.13	738.6	37	699.1	14.48	94.652
KYX@10	199.53	193.68	0.970681	0.06282	0.00202	0.98109	0.02977	0.11328	0.0011	702	66.94	694.2	15.26	691.8	6.38	99.6543
KYX@11	178.42	181.96	1.01984	0.06133	0.00313	0.95893	0.04714	0.11341	0.00169	650.7	105.79	682.7	24.43	692.5	9.76	101.435
KYX@12	213.36	249.96	1.17154	0.06177	0.00181	0.96664	0.02657	0.11351	0.00102	666	61.45	686.7	13.72	693.1	5.88	100.932
KYX@13	175.4	115.87	0.660604	0.05592	0.00626	0.33387	0.03627	0.0433	0.00124	448.9	231.34	292.5	27.61	273.3	7.67	93.4359
KYX@14	274.77	337.21	1.22724	0.0627	0.00235	0.97521	0.03491	0.1128	0.00127	698.2	77.98	691.1	17.95	689	7.37	99.6961
KYX@15	198.76	155.07	0.780187	0.05995	0.00182	0.94033	0.02699	0.11377	0.00105	601.8	64.52	673.1	14.12	694.6	6.05	103.194
KYX@16	150.31	154.78	1.02974	0.06235	0.0023	0.97276	0.03416	0.11316	0.00126	686.2	76.71	689.9	17.58	691	7.27	100.159
KYX@17	230.93	224.6	0.972589	0.05825	0.0016	0.90839	0.02334	0.11311	0.00094	538.5	59.53	656.2	12.42	690.8	5.45	105.273
KYX@18	179.34	321.58	1.79313	0.06196	0.00149	0.96283	0.02132	0.1127	0.00086	672.8	50.53	684.8	11.03	688.4	4.97	100.526
KYX@19	174	201.93	1.16052	0.06225	0.00155	0.97246	0.02242	0.11331	0.00089	682.6	52.26	689.7	11.54	692	5.16	100.333
KYX@20	98.89	92.99	0.940338	0.06129	0.00189	0.95539	0.02782	0.11306	0.00106	649.4	64.83	680.9	14.44	690.5	6.17	101.41
BK@01	648	930.46	0.69643	0.0630437	0.00120326	1.17538	0.0266486	0.135208	0.00217922	709.706	40.5877	789.159	12.4385	817.505	12.375	103.592
BK@02	650	1356.48	0.479182	0.0606523	0.0011908	1.1531	0.025421	0.137871	0.00206113	626.927	42.3262	778.705	11.9883	832.609	11.677	106.922
BK@03	278	584.058	0.47598	0.0638322	0.00104373	1.13932	0.0239456	0.129434	0.00173279	736.076	34.6207	772.186	11.3653	784.637	9.89014	101.612
BK@04	581	1305.02	0.445202	0.121075	0.00300784	2.42647	0.0809584	0.145331	0.00234488	1972.12	44.2868	1250.47	23.9908	874.74	13.198	69.9526
BK@05	394	938.499	0.419819	0.0616032	0.00115084	1.14868	0.0244374	0.135217	0.00186588	660.361	40.0509	776.618	11.5482	817.557	10.5955	105.271
BK@06	138	228.42	0.604149	0.0899428	0.00287803	1.73	0.0553242	0.139482	0.00232183	1424.32	61.1529	1019.75	20.577	841.73	13.1353	82.5426
BK@07	282	378.213	0.745612	0.0665989	0.00136072	1.23484	0.0354984	0.134457	0.00190048	825.255	42.6481	816.541	16.1284	813.243	10.7993	99.596
BK@08	615	847.492	0.72567	0.0608068	0.000828031	1.1513	0.0185278	0.137304	0.00215674	632.408	29.3268	777.857	8.74487	829.397	12.2248	106.626
BK@09	603	1045.83	0.576578	0.0600248	0.000996877	1.09147	0.0193634	0.131867	0.00168631	604.468	35.9361	749.216	9.4007	798.505	9.60417	106.579
BK@10	892	1514.27	0.589063	0.0627262	0.00109738	1.10838	0.0219237	0.128147	0.00152019	698.962	37.268	757.395	10.5583	777.283	8.68664	102.626
BK@11	512	747.655	0.684808	0.0598985	0.000857685	1.09987	0.0180016	0.132862	0.00197485	599.91	31.006	753.287	8.70459	804.173	11.2376	106.755
BK@12	1001	1946.52	0.51425	0.0611032	0.000872233	1.13575	0.0181542	0.134367	0.00200956	642.869	30.6894	770.489	8.63095	812.731	11.42	105.483
BK@13	298	397.37	0.749931	0.0589843	0.00106807	1.10805	0.0235611	0.135699	0.00239456	566.518	39.434	757.235	11.3487	820.298	13.5919	108.328
BK@14	618	899.074	0.687374	0.0595444	0.000998439	1.1064	0.0180311	0.13415	0.00184899	587.057	36.3891	756.44	8.69183	811.499	10.5095	107.279
BK@15	435	591.309	0.735656	0.0590982	0.000871329	1.0488	0.0193933	0.128084	0.00165125	570.715	32.0832	728.288	9.61128	776.927	9.43604	106.678
BK@16	654	944.975	0.692082	0.0589796	0.00122767	1.05923	0.0179573	0.129604	0.00201003	566.344	45.334	733.445	8.85451	785.607	11.4708	107.112
BK@17	648	855.123	0.757786	0.0563806	0.000765653	0.997941	0.0143642	0.12775	0.00162271	467.387	30.0764	702.764	7.30012	775.019	9.27569	110.282
BK@18	355	537.435	0.660545	0.0677932	0.0024921	1.24012	0.0674229	0.132078	0.00243241	862.238	76.3236	818.934	30.561	799.71	13.8509	97.6525
BK@19	507	1041.61	0.486745	0.0565995	0.00710762	0.970247	0.0163341	0.12385	0.00229391	475.963	280.361	688.591	8.41792	752.687	13.1579	109.308
BK@20	626	1371.07	0.456577	0.0550298	0.00102059	0.940677	0.015001	0.123622	0.00150861	413.434	41.4655	673.237	7.84868	751.38	8.65516	111.607
