# Supplementary material
Source: Research Square preprint supplement (doi:10.21203/rs.3.rs-10142139/v1)
Supplement: Supplementary file 2 [file 87511106cccfab4e2f9a0beb.xlsx]

## Sheet: Major_elements
Table S4a. Whole-rock major and selected minor element compositions of KYX, WJG, LZX and BK samples
Sample	Pluton	Rock type	SiO₂	TiO₂	Al₂O₃	TFe₂O₃	MnO	MgO	CaO	Na₂O	K₂O	P₂O₅	LOI	SO₃	Cl	BaO	SrO	ZrO₂	V₂O₅	Cr₂O₃	CoO	NiO	CuO	ZnO	PbO	SnO₂	As₂O₃	Bi	Mo	Sb	W
			wt.%	wt.%	wt.%	wt.%	wt.%	wt.%	wt.%	wt.%	wt.%	wt.%	wt.%	wt.%	wt.%	wt.%	wt.%	wt.%	wt.%	wt.%	wt.%	wt.%	wt.%	wt.%	wt.%	wt.%	wt.%	μg/g	μg/g	μg/g	μg/g
KYX3-1	KYX	Quartz syenite	74.29	0.3	10.49	4.99	0.12	0.06	0.21	4.23	4.67	0.01	0.51	<0.01	<0.01	0.03	0.01	0.13	<0.01	0.02	<0.01	0.02	<0.01	0.03	0.01	0.01	<0.01	<2	<1	<5	<10
KYX3-2	KYX	Quartz syenite	73.77	0.31	10.38	5.16	0.14	0.05	0.18	4.13	4.61	0.02	0.53	<0.01	<0.01	0.02	<0.01	0.08	<0.01	0.01	<0.01	<0.01	<0.01	0.03	<0.01	<0.01	<0.01	<2	<1	<5	<10
KYX3-3	KYX	Quartz syenite	73	0.38	10.48	5.72	0.14	0.06	0.22	4.28	4.69	0.02	0.54	<0.01	<0.01	0.03	<0.01	0.1	<0.01	0.01	<0.01	0.01	<0.01	0.03	<0.01	0.01	<0.01	<2	<1	<5	<10
KYX3-4	KYX	Quartz syenite	72.98	0.36	10.3	5.52	0.16	0.05	0.25	4.47	4.46	0.01	0.44	<0.01	<0.01	0.02	0.01	0.09	<0.01	0.01	<0.01	0.01	<0.01	0.03	<0.01	0.01	<0.01	<2	<1	<5	<10
KYX3-5	KYX	Quartz syenite	73.43	0.32	10.52	5.29	0.13	0.05	0.32	4.62	4.42	0.01	0.22	<0.01	<0.01	0.02	0.01	0.12	<0.01	0.01	<0.01	0.01	<0.01	0.03	<0.01	0.01	<0.01	<2	<1	<5	<10
KYX3-6	KYX	Quartz syenite	74.03	0.33	10.11	4.8	0.13	0.05	0.36	4.17	4.6	0.01	0.3	<0.01	<0.01	0.03	0.01	0.1	<0.01	0.01	<0.01	0.01	<0.01	0.03	<0.01	<0.01	<0.01	<2	<1	<5	<10
KYX3-7	KYX	Quartz syenite	74.27	0.29	10.47	4.77	0.12	0.06	0.22	4.15	4.73	0.01	0.48	<0.01	<0.01	0.03	<0.01	0.11	<0.01	0.01	<0.01	<0.01	<0.01	0.02	<0.01	<0.01	<0.01	<2	<1	<5	<10
KYX3-8	KYX	Quartz syenite	73.33	0.36	10.4	5.38	0.15	0.08	0.26	4.23	4.56	0.01	0.64	<0.01	<0.01	0.02	<0.01	0.14	<0.01	<0.01	<0.01	<0.01	<0.01	0.03	<0.01	<0.01	<0.01	<2	<1	<5	<10
WJG3-1	WJG	Granite	68.89	0.37	15.21	2.8	0.06	1.16	2.89	3.77	2.97	0.11	1.18	0.04	<0.01	0.08	0.04	0.02	<0.01	0.05	<0.01	0.03	<0.01	0.01	<0.01	<0.01	<0.01	2	<1	<5	<10
WJG3-2	WJG	Granite	69.36	0.41	15.5	2.89	0.06	1.22	3.08	3.8	2.76	0.12	1.42	0.03	<0.01	0.09	0.04	0.02	<0.01	<0.01	<0.01	<0.01	<0.01	0.01	<0.01	0.01	<0.01	2	<1	<5	<10
WJG3-3	WJG	Granite	69.31	0.38	15.29	2.82	0.06	1.09	3.01	3.71	2.99	0.11	1.49	0.26	<0.01	0.09	0.04	0.02	<0.01	0.01	<0.01	<0.01	<0.01	0.01	<0.01	<0.01	<0.01	<2	<1	<5	<10
WJG3-4	WJG	Granite	69.2	0.38	15.29	2.85	0.06	1.08	3.12	3.75	2.89	0.11	1.2	0.01	<0.01	0.08	0.04	0.02	<0.01	0.01	<0.01	<0.01	<0.01	0.01	<0.01	<0.01	<0.01	<2	<1	<5	<10
WJG3-5	WJG	Granite	69.38	0.37	15.32	2.78	0.05	1.08	3.09	3.8	2.81	0.11	1.21	0.07	<0.01	0.08	0.04	0.02	<0.01	0.01	<0.01	<0.01	<0.01	0.01	<0.01	0.01	<0.01	<2	<1	<5	<10
WJG3-6	WJG	Granite	68.77	0.39	15.56	2.88	0.06	1.16	3.16	3.83	2.87	0.11	1.27	0.18	<0.01	0.09	0.04	0.02	<0.01	0.02	<0.01	0.01	<0.01	0.01	<0.01	<0.01	<0.01	<2	<1	<5	30
WJG3-7	WJG	Granite	69.28	0.38	14.95	2.7	0.06	1.24	2.91	3.69	2.83	0.11	1.78	0.03	<0.01	0.1	0.04	0.02	<0.01	0.01	<0.01	<0.01	<0.01	0.01	<0.01	<0.01	<0.01	<2	<1	<5	<10
WJG3-8	WJG	Granite	68.5	0.39	15.42	2.9	0.06	1.16	3.26	3.87	2.63	0.12	1.62	0.04	<0.01	0.08	0.04	0.02	<0.01	0.02	<0.01	0.01	<0.01	0.02	<0.01	<0.01	<0.01	<2	<1	<5	<10
HLX 2-1	HLX	Intermediate rock	49.59	0.89	19.6	9.31	0.16	5.62	9.91	3.71	0.22	0.22	0.68	<0.01	0.02	0.02	0.07	0.02	0.02	0.02	0.01	0.01	0.01	0.02	0.01	0.01	0.01	<2	<1	<5	<10
HLX 2-2	HLX	Intermediate rock	49.66	1.05	18.5	10.24	0.18	6.12	9.7	3.57	0.21	0.22	0.57	<0.01	0.06	0.02	0.06	0.02	0.03	0.02	0.01	0.02	<0.01	0.02	<0.01	0.01	<0.01	2	<1	<5	<10
HLX 2-5	HLX	Intermediate rock	48.75	1	18.18	9.99	0.22	6.3	10.2	3.61	0.27	0.23	0.9	0.01	0.46	0.03	0.07	0.02	0.03	0.02	0.01	0.01	<0.01	0.03	0.01	0.01	<0.01	3	<1	<5	<10
HLX 2-6	HLX	Intermediate rock	53.1	0.74	17.45	9.77	0.19	5	8.74	3.57	0.26	0.21	0.87	0.01	0.4	0.02	0.07	0.02	0.03	0.02	0.01	0.02	<0.01	0.03	<0.01	0.01	<0.01	2	<1	<5	<10
HLX 2-7	HLX	Intermediate rock	49.46	1.13	18.78	10.32	0.18	6.05	9.85	3.59	0.22	0.23	0.44	<0.01	0.05	0.02	0.06	0.03	0.03	0.04	0.01	0.03	<0.01	0.02	0.01	0.01	<0.01	2	<1	<5	<10
HLX 2-8	HLX	Intermediate rock	49.11	1.09	18.68	10.39	0.18	6.12	9.91	3.54	0.21	0.24	0.53	<0.01	0.05	0.02	0.06	0.02	0.03	0.02	0.01	0.01	<0.01	0.03	0.01	<0.01	<0.01	2	<1	<5	<10
BK 1-11	BK	Felsic rock	76.34	0.03	13.78	0.37	0.03	0.04	0.98	4.42	3.5	<0.01	0.34	<0.01	<0.01	0.01	0.01	0.01	<0.01	0.02	<0.01	0.01	<0.01	<0.01	<0.01	<0.01	<0.01	<2	<1	<5	<10
BK 1-12	BK	Felsic rock	77	0.01	12.94	0.46	0.12	0.03	0.22	2.48	6.47	0.01	0.35	<0.01	<0.01	<0.01	<0.01	<0.01	<0.01	0.01	<0.01	0.01	<0.01	<0.01	<0.01	<0.01	<0.01	<2	<1	<5	<10
BK 1-14	BK	Felsic rock	75.84	0.02	13.56	0.71	0.04	0.06	0.41	3.29	4.4	0.01	1	<0.01	<0.01	<0.01	<0.01	<0.01	<0.01	0.01	<0.01	<0.01	<0.01	<0.01	<0.01	<0.01	<0.01	<2	<1	<5	<10
BK 1-15	BK	Felsic rock	73.98	0.02	13.64	0.35	0.03	0.04	0.17	1.81	9.04	<0.01	0.37	<0.01	<0.01	0.01	0.01	0.01	<0.01	0.01	<0.01	0.01	<0.01	0.01	<0.01	<0.01	<0.01	<2	<1	<5	<10
BK 2-10	BK	Mafic rock	49.04	0.74	16.72	8.69	0.16	8.7	9.62	2.58	1.59	0.18	2.1	0.29	<0.01	0.04	0.06	0.02	0.02	0.05	0.01	0.02	0.01	0.02	<0.01	0.01	<0.01	<2	<1	<5	<10
BK 2-13	BK	Mafic rock	48.49	0.82	16.38	9.15	0.16	9	9.26	2.48	1.85	0.17	2.03	0.3	<0.01	0.06	0.06	0.02	0.02	0.06	0.01	0.03	<0.01	0.02	0.01	0.01	<0.01	2	<1	<5	<10
BK 2-14	BK	Mafic rock	49.03	0.81	16.64	8.94	0.16	8.14	9.41	2.57	1.98	0.18	2.01	0.31	<0.01	0.06	0.06	0.02	0.01	0.05	0.01	0.02	<0.01	0.02	<0.01	0.01	<0.01	2	<1	<5	<10
BK 2-15	BK	Mafic rock	48.9	0.84	16.46	9.07	0.16	8.63	9.18	2.52	1.99	0.18	2.12	0.29	<0.01	0.06	0.06	0.02	0.01	0.05	0.01	0.02	<0.01	0.02	0.01	0.01	<0.01	<2	<1	<5	<10

## Sheet: Trace_elements
Table S4b. Whole-rock trace element compositions of KYX, WJG, LZX and BK samples
Sample	Pluton	Rock type	Li	Be	Mg	Sc	Ti	V	Cr	Mn	Co	Ni	Cu	Zn	Ga	Rb	Sr	Y	Zr	Nb	Mo	Cd	In	Sn	Cs	Ba	La	Ce	Pr	Nd	Sm	Eu	Gd	Tb	Dy	Ho	Er	Tm	Yb	Lu	Hf	Ta	W	Tl	Pb	Bi	Th	U
			μg/g	μg/g	μg/g	μg/g	μg/g	μg/g	μg/g	μg/g	μg/g	μg/g	μg/g	μg/g	μg/g	μg/g	μg/g	μg/g	μg/g	μg/g	μg/g	μg/g	μg/g	μg/g	μg/g	μg/g	μg/g	μg/g	μg/g	μg/g	μg/g	μg/g	μg/g	μg/g	μg/g	μg/g	μg/g	μg/g	μg/g	μg/g	μg/g	μg/g	μg/g	μg/g	μg/g	μg/g	μg/g	μg/g
KYX3-1	KYX	Quartz syenite	32.77	7.71	791.61	3.6	1862.08	4.2	27.61	1071.66	1.92	12.92	6.28	190.36	10.03	1478.31	6.41	103.74	1004.4	137.33	1.49	0.76	0.15	7.89	1.14	258.54	224.66	470.46	44.64	155.76	27.03	2.92	25.02	3.61	20.87	4.11	10.2	1.39	7.9	1.13	24.45	8.29	0.38	0.58	31.44	0.19	28.45	10.88
KYX3-2	KYX	Quartz syenite	29.13	7.74	8.29	4.71	1919.11	3.01	9.95	1172.55	0.95	7.94	5.48	164.6	9.94	1414.06	3.43	6.7	612.13	138.17	1.3	0.46	0.15	7.39	1.17	227.02	50.96	113	13.98	50.16	8.23	0.87	6.62	0.99	5.7	1.1	2.82	0.38	2.24	0.31	15.33	8.24	0.29	0.55	23.11	0.14	4.74	4.36
KYX3-3	KYX	Quartz syenite	35.27	7.9	605.07	3.01	2283.47	1.66	4.54	1198.74	1.06	2.82	5.6	209.49	12.07	564.17	6.91	114.86	595.76	127.6	0.91	0.47	0.2	9.25	1.01	263.3	205.62	403.29	39.94	141.4	25.04	2.78	23.69	3.56	21.37	4.29	11.19	1.67	10.5	1.59	15.16	7.95	0.31	0.53	26.11	0.19	23.53	6.16
KYX3-4	KYX	Quartz syenite	36.33	7.64	550.23	12.78	2227.77	3.85	5.28	1455.52	0.92	3.66	5	207.68	11.37	683.93	7.57	104.15	747.99	131.25	1.07	0.57	0.19	9	1.37	252.68	227.05	478.6	46.11	161.75	28.42	3.04	26.28	3.85	22.46	4.38	10.76	1.45	8.41	1.19	19.56	8.24	0.32	0.55	24.98	0.15	25.26	7.61
KYX3-5	KYX	Quartz syenite	28.61	8.56	432.92	2.83	1938.57	2.73	3.57	1022.46	1.28	2.17	4.63	179.93	10.44	356.42	10.66	127.52	936.86	166.04	0.75	0.69	0.15	7.72	0.85	228.39	232.55	476.41	50.25	175.54	31.3	3.27	26.95	4.01	24.32	4.95	13.29	1.99	11.93	1.71	23.09	9.66	0.43	0.44	21.06	0.13	38.59	8.66
KYX3-6	KYX	Quartz syenite	29.69	8.11	895.92	4.45	2092.53	2.18	12.94	1164.74	1.41	8.38	5.1	192.91	10.72	1528.76	13.31	111.52	872.83	180.3	1.37	0.71	0.16	8.9	1.26	276.91	232.3	539.6	48.68	172.15	30.13	3.12	26.07	3.78	22.59	4.48	11.63	1.69	9.86	1.36	21.09	10.86	0.54	0.55	32.68	0.16	34.35	10.28
KYX3-7	KYX	Quartz syenite	29.8	7.5	819.3	6.72	1781.65	2.44	5.54	1112.61	1.03	2.51	5.21	189.32	10.78	1477.83	6.91	103.57	937.74	128.32	1.01	0.74	0.15	7.22	1.18	262.27	230.09	447.31	45.72	160.66	27.58	2.97	25.48	3.65	21.15	4.13	10.2	1.35	7.63	1.08	22.92	7.49	0.43	0.57	41.17	0.22	26.24	10.72
KYX3-8	KYX	Quartz syenite	41.11	7.67	1069.02	9.61	2258.54	3.67	3.12	1387.36	2.23	2.03	5.82	216.89	10.19	1399.67	9.45	116.59	1163.53	151.23	1.03	0.92	0.19	9.38	1.18	228.74	228.78	501.73	45.54	161.1	28.16	3.05	26.96	3.94	23.54	4.69	11.74	1.62	9.3	1.34	28.98	9.42	0.39	0.56	28.51	0.15	32.59	12.98
WJG3-1	WJG	Granite	13.69	1.5	11286.6	6.62	2430.64	34.05	22.97	455.39	7.31	8.79	8.92	60.09	14.29	95.04	390.94	13.34	158.14	5.53	0.93	0.04	0.02	0.53	1.14	804.21	41.05	76.46	7.71	28.13	4.44	1.06	2.36	0.32	2.25	0.42	0.81	0.16	0.95	0.15	4.04	0.28	0.41	0.27	14.58	0.1	9.73	1.16
WJG3-2	WJG	Granite	14.37	1.72	32.23	7.45	2400.09	33.9	38.24	335.75	6.19	20.29	5.53	51.16	12.15	12.64	243.12	1.52	160.77	6.57	1.09	0.04	0.02	0.64	0.77	659.05	3.62	9.98	1.53	6.55	1.31	0.47	0.55	0.1	0.83	0.16	0.3	0.06	0.37	0.06	4.11	0.35	0.38	0.24	7.9	0.05	0.86	0.63
WJG3-3	WJG	Granite	10.99	1.67	461.44	7.11	2399.64	34.41	16.93	225.98	5.15	8.19	27.86	51.74	13.56	14.34	102.48	2.42	138.58	6.04	1.12	0.05	0.02	0.67	0.65	749.25	3.87	6.19	1.25	5.23	1.16	0.48	0.53	0.1	0.94	0.19	0.36	0.08	0.48	0.07	3.48	0.31	1.18	0.23	17.49	0.25	0.67	0.48
WJG3-4	WJG	Granite	14.66	1.43	6664.42	3.54	2542.27	37.8	42.35	765.52	5.9	7.39	6.92	48.84	14.32	70.94	355.78	14.65	171.66	6.29	0.96	0.05	0.02	0.61	0.83	776.9	34.36	50.35	6.8	25.55	4.48	1.03	2.29	0.35	2.6	0.48	0.89	0.18	1.05	0.16	4.4	0.34	0.33	0.26	10.29	0.03	8.72	0.88
WJG3-5	WJG	Granite	12.29	1.54	6466.31	3.14	2469.3	35.82	11.91	397.75	5.11	4.74	6.07	49.45	13.4	65.86	349.01	14.36	160.86	6.38	0.49	0.05	0.02	0.57	0.69	732.35	29.01	45.25	6.09	23.16	4.15	0.98	2.04	0.32	2.47	0.46	0.87	0.18	1.04	0.16	4.19	0.37	0.26	0.26	11.8	0.06	8.02	0.85
WJG3-6	WJG	Granite	12.61	1.28	5933.03	3.23	2144.88	28.87	10.56	311.47	4.35	4.41	6.64	41.21	13.38	52.65	352.12	13.93	148.71	5.03	0.6	0.04	0.01	0.53	0.72	754.02	29.33	43.82	6.04	23.26	4.13	1.02	2.09	0.31	2.4	0.45	0.85	0.17	1.01	0.16	3.77	0.27	23.15	0.24	9.63	0.08	8.26	0.89
WJG3-7	WJG	Granite	20.94	1.27	16673.8	5.96	2508.68	35.25	12.98	505.68	7.47	6.9	6.48	68.72	15.44	115.17	388.45	16.66	152.94	5.91	0.72	0.05	0.02	0.62	1.38	929.59	34.74	68.4	6.99	26.52	4.8	1.13	2.47	0.37	2.83	0.52	0.98	0.19	1.12	0.17	3.84	0.33	0.6	0.3	17.08	0.09	8.16	1.43
WJG3-8	WJG	Granite	14.86	1.46	7702.06	3.95	2394.55	32.91	14.21	406.97	5.78	6.12	4.88	49.75	13.02	65.26	383.61	15.02	163.89	5.69	0.52	0.04	0.02	0.55	1.04	695.8	33.76	52.18	6.75	25.52	4.4	1.02	2.25	0.33	2.49	0.46	0.89	0.18	1.07	0.17	4.08	0.29	0.37	0.25	9.41	0.05	8.98	1.18
HLX 2-1	HLX	Intermediate rock	5.81	0.69	6485	10.89	5570.69	193.48	15.76	883	20.54	19.69	50.12	72.74	5.31	7.29	557.38	18.41	100.68	2.39	0.52	0.1	0.06	1.02	0.21	116.49	6.66	22.73	3.07	15.09	3.84	0.96	3.15	0.54	3.46	0.71	1.82	0.28	1.75	0.27	2.54	0.12	0.07	0.02	3.54	0.01	0.36	0.18
HLX 2-2	HLX	Intermediate rock	6.8	0.78	18553	12.49	6620.57	241.23	20.67	1219	29.42	26.81	20.27	95.73	6.2	7.37	571.7	20.25	158.64	3.25	0.56	0.14	0.06	1.21	0.19	145.03	9.29	30.32	3.99	19.17	4.65	1.1	3.75	0.64	4.09	0.84	2.18	0.33	2.1	0.32	3.89	0.17	0.08	0.01	5.02	0.02	0.3	0.2
HLX 2-5	HLX	Intermediate rock	15.02	0.75	33159	13.42	5362.89	248.85	30.65	2153	39.24	33.81	18.72	116.69	8.16	3.01	703.5	20.42	108.27	2.91	0.2	0.11	0.1	1.38	0.04	217.59	10.46	31.31	4.18	19.9	4.74	1.24	3.8	0.65	4.12	0.86	2.26	0.35	2.24	0.34	2.64	0.17	0.14	0.01	6.43	0.02	0.28	0.24
HLX 2-6	HLX	Intermediate rock	17.37	0.91	5722	11.3	5134.96	214.33	35.55	1128	36.62	44.37	33.43	97.28	6.42	6.96	699.5	19.34	124.13	2.83	1.14	0.12	0.08	1.42	0.2	175.96	12.77	35.78	4.2	18.8	4.23	1.23	3.49	0.57	3.57	0.74	1.89	0.29	1.78	0.27	2.98	0.17	0.34	0.02	10.39	0.06	0.31	0.48
HLX 2-7	HLX	Intermediate rock	6.52	0.71	13197	10.77	6802.53	243.17	29.79	1134	29.09	33.13	21.32	92.7	5.7	4.89	559.31	20.33	171.57	3.16	0.69	0.15	0.06	1.18	0.3	129.19	8.31	26.87	3.62	17.68	4.45	1.08	3.55	0.61	3.83	0.79	2.04	0.32	1.97	0.3	4.08	0.16	0.1	0.01	4.16	0.02	0.28	0.16
HLX 2-8	HLX	Intermediate rock	6.34	0.65	15880	9.9	6647.16	241.11	31.03	1179	27.11	33.17	21.24	92.33	5.62	5.41	546.4	20.5	155.88	2.87	0.68	0.14	0.07	1.18	0.23	121.98	7.89	26.29	3.58	17.72	4.49	1.07	3.62	0.62	3.97	0.81	2.09	0.32	2	0.31	3.72	0.15	0.11	0.02	4.4	0.01	0.27	0.16
BK 1-11	BK	Felsic rock	0.65	1.11	88	1.7	222.34	4.66	21.22	99	1.51	9.54	1.62	9.92	4.25	90.39	56.86	33.5	58.79	2.53	0.65	0.02	0.01	0.21	0.39	120.91	1.47	2.03	0.3	1.39	0.75	0.35	0.87	0.28	3.93	1	2.09	0.49	2.88	0.49	2.59	0.15	0.14	0.28	21.67	0.01	2.7	0.54
BK 1-12	BK	Felsic rock	0.54	0.62	87	1.52	109.49	5.08	31.13	889	1.06	10.86	1.13	17.96	2.34	345.12	3.62	9.51	22.44	12.45	0.62	0.02	0.05	1.64	0.63	2.28	5.3	15.13	1.51	6.74	2.08	0.03	0.99	0.18	1.57	0.3	0.54	0.12	0.7	0.1	1.33	0.21	0.16	1.01	30.65	0	3.56	0.64
BK 1-14	BK	Felsic rock	0.27	1.66	243	7.64	137.64	3.35	9.31	302	0.35	3.6	1.26	30.03	3.53	300.17	3.84	9.29	8.84	24.98	0.89	0.01	0.1	2.9	0.59	1.6	4.77	12.49	1.3	5.87	1.83	0.04	0.9	0.17	1.5	0.28	0.48	0.1	0.52	0.07	0.51	0.41	0.12	0.77	19.77	0	3.21	0.47
BK 1-15	BK	Felsic rock	0.03	0.3	188	7.74	204.76	3.46	65.01	246	0.95	29.32	1.87	12.96	2.32	271.45	32.45	17.45	39.54	2.67	1.82	0.02	0	0.18	0.45	57.1	0.33	1.13	0.07	0.37	0.32	0.1	0.43	0.15	2.09	0.53	1.03	0.24	1.34	0.21	1.66	0.15	0.09	0.71	47.43	0	1.03	0.79
BK 2-10	BK	Mafic rock	10.32	1.12	49308	32.2	4437.6	137.87	218.56	1086	40.3	88.3	32.39	63.47	25.39	47.55	491.29	35.66	200.33	8.05	1.02	0.17	0.09	2.2	0.16	285.83	17.65	54.7	7.85	33.11	6.85	1.48	6.61	0.95	5.66	1.19	3.42	0.53	3.46	0.51	4.72	0.35	0.13	0.25	5.67	0.02	0.88	0.24
BK 2-13	BK	Mafic rock	11.93	1.17	52600	38.47	5134.91	145.43	253.7	1157	44.4	97.99	23.9	73.93	27.69	48.24	451.06	34.78	176.75	8.53	0.68	0.15	0.09	2.18	0.15	327.12	18.38	56.31	7.92	33.25	6.84	1.54	6.8	0.99	5.8	1.2	3.37	0.51	3.36	0.49	4.27	0.37	0.12	0.27	4.91	0.02	0.84	0.23
BK 2-14	BK	Mafic rock	10.63	1.19	67231	146.12	4620.08	139.59	229.52	1116	38.98	83.77	21.82	70.68	26.02	44.86	463.28	43.36	164.9	6.88	0.7	0.15	0.1	2	0.16	302.52	19.67	59.24	8.47	36.06	7.41	1.64	7.37	1.05	6.16	1.27	3.6	0.54	3.52	0.51	4	0.32	0.13	0.27	4.64	0.02	1.75	0.24
BK 2-15	BK	Mafic rock	12.78	1.17	48551	36.44	4967.57	141.05	269.71	1166	44.03	93.19	25.3	73.48	27.02	48.4	451.7	32.69	168.96	7.62	0.84	0.15	0.1	2.1	0.18	328.76	18.24	56.37	8.05	33.67	6.74	1.52	6.56	0.92	5.42	1.13	3.19	0.48	3.11	0.45	4.12	0.34	0.13	0.35	4.72	0.02	0.7	0.2
