# Supplementary material
Source: Research Square preprint supplement (doi:10.21203/rs.3.rs-10142139/v1)
Supplement: Supplementary file 3 [file 8b6e4743631e45db7e835f4f.xlsx]

## Sheet: Table S3_Model results
Table S3 Parameters and results of water–rock reaction modelling for generating low-δ18O rocks
Lithology	Fluid δ18O (‰)	W/R	Temperature (°C)	Δrock-water (‰)	Initial rock δ18O (‰)	Exchange coefficient k	Modelled final rock δ18O (‰)
Granite	-10	0.1	200	9	6	1	5.36364
Granite	-10	0.1	250	7	6	1	5.18182
Granite	-10	0.1	300	5.3	6	1	5.02727
Granite	-10	0.1	350	3.2	6	1	4.83636
Granite	-10	0.1	400	2.1	6	1	4.73636
Granite	-10	0.1	450	1.6	6	1	4.69091
Granite	-10	1	200	9	6	1	2.5
Granite	-10	1	250	7	6	1	1.5
Granite	-10	1	300	5.3	6	1	0.65
Granite	-10	1	350	3.2	6	1	-0.4
Granite	-10	1	400	2.1	6	1	-0.95
Granite	-10	1	450	1.6	6	1	-1.2
Granite	-10	3	200	9	6	1	0.75
Granite	-10	3	250	7	6	1	-0.75
Granite	-10	3	300	5.3	6	1	-2.025
Granite	-10	3	350	3.2	6	1	-3.6
Granite	-10	3	400	2.1	6	1	-4.425
Granite	-10	3	450	1.6	6	1	-4.8
Granite	-10	10	200	9	6	1	-0.363636
Granite	-10	10	250	7	6	1	-2.18182
Granite	-10	10	300	5.3	6	1	-3.72727
Granite	-10	10	350	3.2	6	1	-5.63636
Granite	-10	10	400	2.1	6	1	-6.63636
Granite	-10	10	450	1.6	6	1	-7.09091
Granite	-9	0.1	200	9	6	1	5.45455
Granite	-9	0.1	250	7	6	1	5.27273
Granite	-9	0.1	300	5.3	6	1	5.11818
Granite	-9	0.1	350	3.2	6	1	4.92727
Granite	-9	0.1	400	2.1	6	1	4.82727
Granite	-9	0.1	450	1.6	6	1	4.78182
Granite	-9	1	200	9	6	1	3
Granite	-9	1	250	7	6	1	2
Granite	-9	1	300	5.3	6	1	1.15
Granite	-9	1	350	3.2	6	1	0.1
Granite	-9	1	400	2.1	6	1	-0.45
Granite	-9	1	450	1.6	6	1	-0.7
Granite	-9	3	200	9	6	1	1.5
Granite	-9	3	250	7	6	1	0
Granite	-9	3	300	5.3	6	1	-1.275
Granite	-9	3	350	3.2	6	1	-2.85
Granite	-9	3	400	2.1	6	1	-3.675
Granite	-9	3	450	1.6	6	1	-4.05
Granite	-9	10	200	9	6	1	0.545455
Granite	-9	10	250	7	6	1	-1.27273
Granite	-9	10	300	5.3	6	1	-2.81818
Granite	-9	10	350	3.2	6	1	-4.72727
Granite	-9	10	400	2.1	6	1	-5.72727
Granite	-9	10	450	1.6	6	1	-6.18182
Granite	-8	0.1	200	9	6	1	5.54545
Granite	-8	0.1	250	7	6	1	5.36364
Granite	-8	0.1	300	5.3	6	1	5.20909
Granite	-8	0.1	350	3.2	6	1	5.01818
Granite	-8	0.1	400	2.1	6	1	4.91818
Granite	-8	0.1	450	1.6	6	1	4.87273
Granite	-8	1	200	9	6	1	3.5
Granite	-8	1	250	7	6	1	2.5
Granite	-8	1	300	5.3	6	1	1.65
Granite	-8	1	350	3.2	6	1	0.6
Granite	-8	1	400	2.1	6	1	0.05
Granite	-8	1	450	1.6	6	1	-0.2
Granite	-8	3	200	9	6	1	2.25
Granite	-8	3	250	7	6	1	0.75
Granite	-8	3	300	5.3	6	1	-0.525
Granite	-8	3	350	3.2	6	1	-2.1
Granite	-8	3	400	2.1	6	1	-2.925
Granite	-8	3	450	1.6	6	1	-3.3
Granite	-8	10	200	9	6	1	1.45455
Granite	-8	10	250	7	6	1	-0.363636
Granite	-8	10	300	5.3	6	1	-1.90909
Granite	-8	10	350	3.2	6	1	-3.81818
Granite	-8	10	400	2.1	6	1	-4.81818
Granite	-8	10	450	1.6	6	1	-5.27273
Granite	-7	0.1	200	9	6	1	5.63636
Granite	-7	0.1	250	7	6	1	5.45455
Granite	-7	0.1	300	5.3	6	1	5.3
Granite	-7	0.1	350	3.2	6	1	5.10909
Granite	-7	0.1	400	2.1	6	1	5.00909
Granite	-7	0.1	450	1.6	6	1	4.96364
Granite	-7	1	200	9	6	1	4
Granite	-7	1	250	7	6	1	3
Granite	-7	1	300	5.3	6	1	2.15
Granite	-7	1	350	3.2	6	1	1.1
Granite	-7	1	400	2.1	6	1	0.55
Granite	-7	1	450	1.6	6	1	0.3
Granite	-7	3	200	9	6	1	3
Granite	-7	3	250	7	6	1	1.5
Granite	-7	3	300	5.3	6	1	0.225
Granite	-7	3	350	3.2	6	1	-1.35
Granite	-7	3	400	2.1	6	1	-2.175
Granite	-7	3	450	1.6	6	1	-2.55
Granite	-7	10	200	9	6	1	2.36364
Granite	-7	10	250	7	6	1	0.545455
Granite	-7	10	300	5.3	6	1	-1
Granite	-7	10	350	3.2	6	1	-2.90909
Granite	-7	10	400	2.1	6	1	-3.90909
Granite	-7	10	450	1.6	6	1	-4.36364
Granite	-6	0.1	200	9	6	1	5.72727
Granite	-6	0.1	250	7	6	1	5.54545
Granite	-6	0.1	300	5.3	6	1	5.39091
Granite	-6	0.1	350	3.2	6	1	5.2
Granite	-6	0.1	400	2.1	6	1	5.1
Granite	-6	0.1	450	1.6	6	1	5.05455
Granite	-6	1	200	9	6	1	4.5
Granite	-6	1	250	7	6	1	3.5
Granite	-6	1	300	5.3	6	1	2.65
Granite	-6	1	350	3.2	6	1	1.6
Granite	-6	1	400	2.1	6	1	1.05
Granite	-6	1	450	1.6	6	1	0.8
Granite	-6	3	200	9	6	1	3.75
Granite	-6	3	250	7	6	1	2.25
Granite	-6	3	300	5.3	6	1	0.975
Granite	-6	3	350	3.2	6	1	-0.6
Granite	-6	3	400	2.1	6	1	-1.425
Granite	-6	3	450	1.6	6	1	-1.8
Granite	-6	10	200	9	6	1	3.27273
Granite	-6	10	250	7	6	1	1.45455
Granite	-6	10	300	5.3	6	1	-0.0909091
Granite	-6	10	350	3.2	6	1	-2
Granite	-6	10	400	2.1	6	1	-3
Granite	-6	10	450	1.6	6	1	-3.45455
Granite	-5	0.1	200	9	6	1	5.81818
Granite	-5	0.1	250	7	6	1	5.63636
Granite	-5	0.1	300	5.3	6	1	5.48182
Granite	-5	0.1	350	3.2	6	1	5.29091
Granite	-5	0.1	400	2.1	6	1	5.19091
Granite	-5	0.1	450	1.6	6	1	5.14545
Granite	-5	1	200	9	6	1	5
Granite	-5	1	250	7	6	1	4
Granite	-5	1	300	5.3	6	1	3.15
Granite	-5	1	350	3.2	6	1	2.1
Granite	-5	1	400	2.1	6	1	1.55
Granite	-5	1	450	1.6	6	1	1.3
Granite	-5	3	200	9	6	1	4.5
Granite	-5	3	250	7	6	1	3
Granite	-5	3	300	5.3	6	1	1.725
Granite	-5	3	350	3.2	6	1	0.15
Granite	-5	3	400	2.1	6	1	-0.675
Granite	-5	3	450	1.6	6	1	-1.05
Granite	-5	10	200	9	6	1	4.18182
Granite	-5	10	250	7	6	1	2.36364
Granite	-5	10	300	5.3	6	1	0.818182
Granite	-5	10	350	3.2	6	1	-1.09091
Granite	-5	10	400	2.1	6	1	-2.09091
Granite	-5	10	450	1.6	6	1	-2.54545
Granite	-4	0.1	200	9	6	1	5.90909
Granite	-4	0.1	250	7	6	1	5.72727
Granite	-4	0.1	300	5.3	6	1	5.57273
Granite	-4	0.1	350	3.2	6	1	5.38182
Granite	-4	0.1	400	2.1	6	1	5.28182
Granite	-4	0.1	450	1.6	6	1	5.23636
Granite	-4	1	200	9	6	1	5.5
Granite	-4	1	250	7	6	1	4.5
Granite	-4	1	300	5.3	6	1	3.65
Granite	-4	1	350	3.2	6	1	2.6
Granite	-4	1	400	2.1	6	1	2.05
Granite	-4	1	450	1.6	6	1	1.8
Granite	-4	3	200	9	6	1	5.25
Granite	-4	3	250	7	6	1	3.75
Granite	-4	3	300	5.3	6	1	2.475
Granite	-4	3	350	3.2	6	1	0.9
Granite	-4	3	400	2.1	6	1	0.075
Granite	-4	3	450	1.6	6	1	-0.3
Granite	-4	10	200	9	6	1	5.09091
Granite	-4	10	250	7	6	1	3.27273
Granite	-4	10	300	5.3	6	1	1.72727
Granite	-4	10	350	3.2	6	1	-0.181818
Granite	-4	10	400	2.1	6	1	-1.18182
Granite	-4	10	450	1.6	6	1	-1.63636
Granite	-3	0.1	200	9	6	1	6
Granite	-3	0.1	250	7	6	1	5.81818
Granite	-3	0.1	300	5.3	6	1	5.66364
Granite	-3	0.1	350	3.2	6	1	5.47273
Granite	-3	0.1	400	2.1	6	1	5.37273
Granite	-3	0.1	450	1.6	6	1	5.32727
Granite	-3	1	200	9	6	1	6
Granite	-3	1	250	7	6	1	5
Granite	-3	1	300	5.3	6	1	4.15
Granite	-3	1	350	3.2	6	1	3.1
Granite	-3	1	400	2.1	6	1	2.55
Granite	-3	1	450	1.6	6	1	2.3
Granite	-3	3	200	9	6	1	6
Granite	-3	3	250	7	6	1	4.5
Granite	-3	3	300	5.3	6	1	3.225
Granite	-3	3	350	3.2	6	1	1.65
Granite	-3	3	400	2.1	6	1	0.825
Granite	-3	3	450	1.6	6	1	0.45
Granite	-3	10	200	9	6	1	6
Granite	-3	10	250	7	6	1	4.18182
Granite	-3	10	300	5.3	6	1	2.63636
Granite	-3	10	350	3.2	6	1	0.727273
Granite	-3	10	400	2.1	6	1	-0.272727
Granite	-3	10	450	1.6	6	1	-0.727273
Granite	-2	0.1	200	9	6	1	6.09091
Granite	-2	0.1	250	7	6	1	5.90909
Granite	-2	0.1	300	5.3	6	1	5.75455
Granite	-2	0.1	350	3.2	6	1	5.56364
Granite	-2	0.1	400	2.1	6	1	5.46364
Granite	-2	0.1	450	1.6	6	1	5.41818
Granite	-2	1	200	9	6	1	6.5
Granite	-2	1	250	7	6	1	5.5
Granite	-2	1	300	5.3	6	1	4.65
Granite	-2	1	350	3.2	6	1	3.6
Granite	-2	1	400	2.1	6	1	3.05
Granite	-2	1	450	1.6	6	1	2.8
Granite	-2	3	200	9	6	1	6.75
Granite	-2	3	250	7	6	1	5.25
Granite	-2	3	300	5.3	6	1	3.975
Granite	-2	3	350	3.2	6	1	2.4
Granite	-2	3	400	2.1	6	1	1.575
Granite	-2	3	450	1.6	6	1	1.2
Granite	-2	10	200	9	6	1	6.90909
Granite	-2	10	250	7	6	1	5.09091
Granite	-2	10	300	5.3	6	1	3.54545
Granite	-2	10	350	3.2	6	1	1.63636
Granite	-2	10	400	2.1	6	1	0.636364
Granite	-2	10	450	1.6	6	1	0.181818
Granite	-1	0.1	200	9	6	1	6.18182
Granite	-1	0.1	250	7	6	1	6
Granite	-1	0.1	300	5.3	6	1	5.84545
Granite	-1	0.1	350	3.2	6	1	5.65455
Granite	-1	0.1	400	2.1	6	1	5.55455
Granite	-1	0.1	450	1.6	6	1	5.50909
Granite	-1	1	200	9	6	1	7
Granite	-1	1	250	7	6	1	6
Granite	-1	1	300	5.3	6	1	5.15
Granite	-1	1	350	3.2	6	1	4.1
Granite	-1	1	400	2.1	6	1	3.55
Granite	-1	1	450	1.6	6	1	3.3
Granite	-1	3	200	9	6	1	7.5
Granite	-1	3	250	7	6	1	6
Granite	-1	3	300	5.3	6	1	4.725
Granite	-1	3	350	3.2	6	1	3.15
Granite	-1	3	400	2.1	6	1	2.325
Granite	-1	3	450	1.6	6	1	1.95
Granite	-1	10	200	9	6	1	7.81818
Granite	-1	10	250	7	6	1	6
Granite	-1	10	300	5.3	6	1	4.45455
Granite	-1	10	350	3.2	6	1	2.54545
Granite	-1	10	400	2.1	6	1	1.54545
Granite	-1	10	450	1.6	6	1	1.09091
Granite	0	0.1	200	9	6	1	6.27273
Granite	0	0.1	250	7	6	1	6.09091
Granite	0	0.1	300	5.3	6	1	5.93636
Granite	0	0.1	350	3.2	6	1	5.74545
Granite	0	0.1	400	2.1	6	1	5.64545
Granite	0	0.1	450	1.6	6	1	5.6
Granite	0	1	200	9	6	1	7.5
Granite	0	1	250	7	6	1	6.5
Granite	0	1	300	5.3	6	1	5.65
Granite	0	1	350	3.2	6	1	4.6
Granite	0	1	400	2.1	6	1	4.05
Granite	0	1	450	1.6	6	1	3.8
Granite	0	3	200	9	6	1	8.25
Granite	0	3	250	7	6	1	6.75
Granite	0	3	300	5.3	6	1	5.475
Granite	0	3	350	3.2	6	1	3.9
Granite	0	3	400	2.1	6	1	3.075
Granite	0	3	450	1.6	6	1	2.7
Granite	0	10	200	9	6	1	8.72727
Granite	0	10	250	7	6	1	6.90909
Granite	0	10	300	5.3	6	1	5.36364
Granite	0	10	350	3.2	6	1	3.45455
Granite	0	10	400	2.1	6	1	2.45455
Granite	0	10	450	1.6	6	1	2
Diorite	-10	0.1	200	7.2	6	1	5.2
Diorite	-10	0.1	250	4.8	6	1	4.98182
Diorite	-10	0.1	300	3.3	6	1	4.84545
Diorite	-10	0.1	350	1.9	6	1	4.71818
Diorite	-10	0.1	400	1	6	1	4.63636
Diorite	-10	0.1	450	0.7	6	1	4.60909
Diorite	-10	1	200	7.2	6	1	1.6
Diorite	-10	1	250	4.8	6	1	0.4
Diorite	-10	1	300	3.3	6	1	-0.35
Diorite	-10	1	350	1.9	6	1	-1.05
Diorite	-10	1	400	1	6	1	-1.5
Diorite	-10	1	450	0.7	6	1	-1.65
Diorite	-10	3	200	7.2	6	1	-0.6
Diorite	-10	3	250	4.8	6	1	-2.4
Diorite	-10	3	300	3.3	6	1	-3.525
Diorite	-10	3	350	1.9	6	1	-4.575
Diorite	-10	3	400	1	6	1	-5.25
Diorite	-10	3	450	0.7	6	1	-5.475
Diorite	-10	10	200	7.2	6	1	-2
Diorite	-10	10	250	4.8	6	1	-4.18182
Diorite	-10	10	300	3.3	6	1	-5.54545
Diorite	-10	10	350	1.9	6	1	-6.81818
Diorite	-10	10	400	1	6	1	-7.63636
Diorite	-10	10	450	0.7	6	1	-7.90909
Diorite	-9	0.1	200	7.2	6	1	5.29091
Diorite	-9	0.1	250	4.8	6	1	5.07273
Diorite	-9	0.1	300	3.3	6	1	4.93636
Diorite	-9	0.1	350	1.9	6	1	4.80909
Diorite	-9	0.1	400	1	6	1	4.72727
Diorite	-9	0.1	450	0.7	6	1	4.7
Diorite	-9	1	200	7.2	6	1	2.1
Diorite	-9	1	250	4.8	6	1	0.9
Diorite	-9	1	300	3.3	6	1	0.15
Diorite	-9	1	350	1.9	6	1	-0.55
Diorite	-9	1	400	1	6	1	-1
Diorite	-9	1	450	0.7	6	1	-1.15
Diorite	-9	3	200	7.2	6	1	0.15
Diorite	-9	3	250	4.8	6	1	-1.65
Diorite	-9	3	300	3.3	6	1	-2.775
Diorite	-9	3	350	1.9	6	1	-3.825
Diorite	-9	3	400	1	6	1	-4.5
Diorite	-9	3	450	0.7	6	1	-4.725
Diorite	-9	10	200	7.2	6	1	-1.09091
Diorite	-9	10	250	4.8	6	1	-3.27273
Diorite	-9	10	300	3.3	6	1	-4.63636
Diorite	-9	10	350	1.9	6	1	-5.90909
Diorite	-9	10	400	1	6	1	-6.72727
Diorite	-9	10	450	0.7	6	1	-7
Diorite	-8	0.1	200	7.2	6	1	5.38182
Diorite	-8	0.1	250	4.8	6	1	5.16364
Diorite	-8	0.1	300	3.3	6	1	5.02727
Diorite	-8	0.1	350	1.9	6	1	4.9
Diorite	-8	0.1	400	1	6	1	4.81818
Diorite	-8	0.1	450	0.7	6	1	4.79091
Diorite	-8	1	200	7.2	6	1	2.6
Diorite	-8	1	250	4.8	6	1	1.4
Diorite	-8	1	300	3.3	6	1	0.65
Diorite	-8	1	350	1.9	6	1	-0.05
Diorite	-8	1	400	1	6	1	-0.5
Diorite	-8	1	450	0.7	6	1	-0.65
Diorite	-8	3	200	7.2	6	1	0.9
Diorite	-8	3	250	4.8	6	1	-0.9
Diorite	-8	3	300	3.3	6	1	-2.025
Diorite	-8	3	350	1.9	6	1	-3.075
Diorite	-8	3	400	1	6	1	-3.75
Diorite	-8	3	450	0.7	6	1	-3.975
Diorite	-8	10	200	7.2	6	1	-0.181818
Diorite	-8	10	250	4.8	6	1	-2.36364
Diorite	-8	10	300	3.3	6	1	-3.72727
Diorite	-8	10	350	1.9	6	1	-5
Diorite	-8	10	400	1	6	1	-5.81818
Diorite	-8	10	450	0.7	6	1	-6.09091
Diorite	-7	0.1	200	7.2	6	1	5.47273
Diorite	-7	0.1	250	4.8	6	1	5.25455
Diorite	-7	0.1	300	3.3	6	1	5.11818
Diorite	-7	0.1	350	1.9	6	1	4.99091
Diorite	-7	0.1	400	1	6	1	4.90909
Diorite	-7	0.1	450	0.7	6	1	4.88182
Diorite	-7	1	200	7.2	6	1	3.1
Diorite	-7	1	250	4.8	6	1	1.9
Diorite	-7	1	300	3.3	6	1	1.15
Diorite	-7	1	350	1.9	6	1	0.45
Diorite	-7	1	400	1	6	1	0
Diorite	-7	1	450	0.7	6	1	-0.15
Diorite	-7	3	200	7.2	6	1	1.65
Diorite	-7	3	250	4.8	6	1	-0.15
Diorite	-7	3	300	3.3	6	1	-1.275
Diorite	-7	3	350	1.9	6	1	-2.325
Diorite	-7	3	400	1	6	1	-3
Diorite	-7	3	450	0.7	6	1	-3.225
Diorite	-7	10	200	7.2	6	1	0.727273
Diorite	-7	10	250	4.8	6	1	-1.45455
Diorite	-7	10	300	3.3	6	1	-2.81818
Diorite	-7	10	350	1.9	6	1	-4.09091
Diorite	-7	10	400	1	6	1	-4.90909
Diorite	-7	10	450	0.7	6	1	-5.18182
Diorite	-6	0.1	200	7.2	6	1	5.56364
Diorite	-6	0.1	250	4.8	6	1	5.34545
Diorite	-6	0.1	300	3.3	6	1	5.20909
Diorite	-6	0.1	350	1.9	6	1	5.08182
Diorite	-6	0.1	400	1	6	1	5
Diorite	-6	0.1	450	0.7	6	1	4.97273
Diorite	-6	1	200	7.2	6	1	3.6
Diorite	-6	1	250	4.8	6	1	2.4
Diorite	-6	1	300	3.3	6	1	1.65
Diorite	-6	1	350	1.9	6	1	0.95
Diorite	-6	1	400	1	6	1	0.5
Diorite	-6	1	450	0.7	6	1	0.35
Diorite	-6	3	200	7.2	6	1	2.4
Diorite	-6	3	250	4.8	6	1	0.6
Diorite	-6	3	300	3.3	6	1	-0.525
Diorite	-6	3	350	1.9	6	1	-1.575
Diorite	-6	3	400	1	6	1	-2.25
Diorite	-6	3	450	0.7	6	1	-2.475
Diorite	-6	10	200	7.2	6	1	1.63636
Diorite	-6	10	250	4.8	6	1	-0.545455
Diorite	-6	10	300	3.3	6	1	-1.90909
Diorite	-6	10	350	1.9	6	1	-3.18182
Diorite	-6	10	400	1	6	1	-4
Diorite	-6	10	450	0.7	6	1	-4.27273
Diorite	-5	0.1	200	7.2	6	1	5.65455
Diorite	-5	0.1	250	4.8	6	1	5.43636
Diorite	-5	0.1	300	3.3	6	1	5.3
Diorite	-5	0.1	350	1.9	6	1	5.17273
Diorite	-5	0.1	400	1	6	1	5.09091
Diorite	-5	0.1	450	0.7	6	1	5.06364
Diorite	-5	1	200	7.2	6	1	4.1
Diorite	-5	1	250	4.8	6	1	2.9
Diorite	-5	1	300	3.3	6	1	2.15
Diorite	-5	1	350	1.9	6	1	1.45
Diorite	-5	1	400	1	6	1	1
Diorite	-5	1	450	0.7	6	1	0.85
Diorite	-5	3	200	7.2	6	1	3.15
Diorite	-5	3	250	4.8	6	1	1.35
Diorite	-5	3	300	3.3	6	1	0.225
Diorite	-5	3	350	1.9	6	1	-0.825
Diorite	-5	3	400	1	6	1	-1.5
Diorite	-5	3	450	0.7	6	1	-1.725
Diorite	-5	10	200	7.2	6	1	2.54545
Diorite	-5	10	250	4.8	6	1	0.363636
Diorite	-5	10	300	3.3	6	1	-1
Diorite	-5	10	350	1.9	6	1	-2.27273
Diorite	-5	10	400	1	6	1	-3.09091
Diorite	-5	10	450	0.7	6	1	-3.36364
Diorite	-4	0.1	200	7.2	6	1	5.74545
Diorite	-4	0.1	250	4.8	6	1	5.52727
Diorite	-4	0.1	300	3.3	6	1	5.39091
Diorite	-4	0.1	350	1.9	6	1	5.26364
Diorite	-4	0.1	400	1	6	1	5.18182
Diorite	-4	0.1	450	0.7	6	1	5.15455
Diorite	-4	1	200	7.2	6	1	4.6
Diorite	-4	1	250	4.8	6	1	3.4
Diorite	-4	1	300	3.3	6	1	2.65
Diorite	-4	1	350	1.9	6	1	1.95
Diorite	-4	1	400	1	6	1	1.5
Diorite	-4	1	450	0.7	6	1	1.35
Diorite	-4	3	200	7.2	6	1	3.9
Diorite	-4	3	250	4.8	6	1	2.1
Diorite	-4	3	300	3.3	6	1	0.975
Diorite	-4	3	350	1.9	6	1	-0.075
Diorite	-4	3	400	1	6	1	-0.75
Diorite	-4	3	450	0.7	6	1	-0.975
Diorite	-4	10	200	7.2	6	1	3.45455
Diorite	-4	10	250	4.8	6	1	1.27273
Diorite	-4	10	300	3.3	6	1	-0.0909091
Diorite	-4	10	350	1.9	6	1	-1.36364
Diorite	-4	10	400	1	6	1	-2.18182
Diorite	-4	10	450	0.7	6	1	-2.45455
Diorite	-3	0.1	200	7.2	6	1	5.83636
Diorite	-3	0.1	250	4.8	6	1	5.61818
Diorite	-3	0.1	300	3.3	6	1	5.48182
Diorite	-3	0.1	350	1.9	6	1	5.35455
Diorite	-3	0.1	400	1	6	1	5.27273
Diorite	-3	0.1	450	0.7	6	1	5.24545
Diorite	-3	1	200	7.2	6	1	5.1
Diorite	-3	1	250	4.8	6	1	3.9
Diorite	-3	1	300	3.3	6	1	3.15
Diorite	-3	1	350	1.9	6	1	2.45
Diorite	-3	1	400	1	6	1	2
Diorite	-3	1	450	0.7	6	1	1.85
Diorite	-3	3	200	7.2	6	1	4.65
Diorite	-3	3	250	4.8	6	1	2.85
Diorite	-3	3	300	3.3	6	1	1.725
Diorite	-3	3	350	1.9	6	1	0.675
Diorite	-3	3	400	1	6	1	0
Diorite	-3	3	450	0.7	6	1	-0.225
Diorite	-3	10	200	7.2	6	1	4.36364
Diorite	-3	10	250	4.8	6	1	2.18182
Diorite	-3	10	300	3.3	6	1	0.818182
Diorite	-3	10	350	1.9	6	1	-0.454545
Diorite	-3	10	400	1	6	1	-1.27273
Diorite	-3	10	450	0.7	6	1	-1.54545
Diorite	-2	0.1	200	7.2	6	1	5.92727
Diorite	-2	0.1	250	4.8	6	1	5.70909
Diorite	-2	0.1	300	3.3	6	1	5.57273
Diorite	-2	0.1	350	1.9	6	1	5.44545
Diorite	-2	0.1	400	1	6	1	5.36364
Diorite	-2	0.1	450	0.7	6	1	5.33636
Diorite	-2	1	200	7.2	6	1	5.6
Diorite	-2	1	250	4.8	6	1	4.4
Diorite	-2	1	300	3.3	6	1	3.65
Diorite	-2	1	350	1.9	6	1	2.95
Diorite	-2	1	400	1	6	1	2.5
Diorite	-2	1	450	0.7	6	1	2.35
Diorite	-2	3	200	7.2	6	1	5.4
Diorite	-2	3	250	4.8	6	1	3.6
Diorite	-2	3	300	3.3	6	1	2.475
Diorite	-2	3	350	1.9	6	1	1.425
Diorite	-2	3	400	1	6	1	0.75
Diorite	-2	3	450	0.7	6	1	0.525
Diorite	-2	10	200	7.2	6	1	5.27273
Diorite	-2	10	250	4.8	6	1	3.09091
Diorite	-2	10	300	3.3	6	1	1.72727
Diorite	-2	10	350	1.9	6	1	0.454545
Diorite	-2	10	400	1	6	1	-0.363636
Diorite	-2	10	450	0.7	6	1	-0.636364
Diorite	-1	0.1	200	7.2	6	1	6.01818
Diorite	-1	0.1	250	4.8	6	1	5.8
Diorite	-1	0.1	300	3.3	6	1	5.66364
Diorite	-1	0.1	350	1.9	6	1	5.53636
Diorite	-1	0.1	400	1	6	1	5.45455
Diorite	-1	0.1	450	0.7	6	1	5.42727
Diorite	-1	1	200	7.2	6	1	6.1
Diorite	-1	1	250	4.8	6	1	4.9
Diorite	-1	1	300	3.3	6	1	4.15
Diorite	-1	1	350	1.9	6	1	3.45
Diorite	-1	1	400	1	6	1	3
Diorite	-1	1	450	0.7	6	1	2.85
Diorite	-1	3	200	7.2	6	1	6.15
Diorite	-1	3	250	4.8	6	1	4.35
Diorite	-1	3	300	3.3	6	1	3.225
Diorite	-1	3	350	1.9	6	1	2.175
Diorite	-1	3	400	1	6	1	1.5
Diorite	-1	3	450	0.7	6	1	1.275
Diorite	-1	10	200	7.2	6	1	6.18182
Diorite	-1	10	250	4.8	6	1	4
Diorite	-1	10	300	3.3	6	1	2.63636
Diorite	-1	10	350	1.9	6	1	1.36364
Diorite	-1	10	400	1	6	1	0.545455
Diorite	-1	10	450	0.7	6	1	0.272727
Diorite	0	0.1	200	7.2	6	1	6.10909
Diorite	0	0.1	250	4.8	6	1	5.89091
Diorite	0	0.1	300	3.3	6	1	5.75455
Diorite	0	0.1	350	1.9	6	1	5.62727
Diorite	0	0.1	400	1	6	1	5.54545
Diorite	0	0.1	450	0.7	6	1	5.51818
Diorite	0	1	200	7.2	6	1	6.6
Diorite	0	1	250	4.8	6	1	5.4
Diorite	0	1	300	3.3	6	1	4.65
Diorite	0	1	350	1.9	6	1	3.95
Diorite	0	1	400	1	6	1	3.5
Diorite	0	1	450	0.7	6	1	3.35
Diorite	0	3	200	7.2	6	1	6.9
Diorite	0	3	250	4.8	6	1	5.1
Diorite	0	3	300	3.3	6	1	3.975
Diorite	0	3	350	1.9	6	1	2.925
Diorite	0	3	400	1	6	1	2.25
Diorite	0	3	450	0.7	6	1	2.025
Diorite	0	10	200	7.2	6	1	7.09091
Diorite	0	10	250	4.8	6	1	4.90909
Diorite	0	10	300	3.3	6	1	3.54545
Diorite	0	10	350	1.9	6	1	2.27273
Diorite	0	10	400	1	6	1	1.45455
Diorite	0	10	450	0.7	6	1	1.18182
Gabbro	-10	0.1	200	5	6	1	5
Gabbro	-10	0.1	250	3.1	6	1	4.82727
Gabbro	-10	0.1	300	1.8	6	1	4.70909
Gabbro	-10	0.1	350	0.8	6	1	4.61818
Gabbro	-10	0.1	400	0	6	1	4.54545
Gabbro	-10	0.1	450	-0.8	6	1	4.47273
Gabbro	-10	1	200	5	6	1	0.5
Gabbro	-10	1	250	3.1	6	1	-0.45
Gabbro	-10	1	300	1.8	6	1	-1.1
Gabbro	-10	1	350	0.8	6	1	-1.6
Gabbro	-10	1	400	0	6	1	-2
Gabbro	-10	1	450	-0.8	6	1	-2.4
Gabbro	-10	3	200	5	6	1	-2.25
Gabbro	-10	3	250	3.1	6	1	-3.675
Gabbro	-10	3	300	1.8	6	1	-4.65
Gabbro	-10	3	350	0.8	6	1	-5.4
Gabbro	-10	3	400	0	6	1	-6
Gabbro	-10	3	450	-0.8	6	1	-6.6
Gabbro	-10	10	200	5	6	1	-4
Gabbro	-10	10	250	3.1	6	1	-5.72727
Gabbro	-10	10	300	1.8	6	1	-6.90909
Gabbro	-10	10	350	0.8	6	1	-7.81818
Gabbro	-10	10	400	0	6	1	-8.54545
Gabbro	-10	10	450	-0.8	6	1	-9.27273
Gabbro	-9	0.1	200	5	6	1	5.09091
Gabbro	-9	0.1	250	3.1	6	1	4.91818
Gabbro	-9	0.1	300	1.8	6	1	4.8
Gabbro	-9	0.1	350	0.8	6	1	4.70909
Gabbro	-9	0.1	400	0	6	1	4.63636
Gabbro	-9	0.1	450	-0.8	6	1	4.56364
Gabbro	-9	1	200	5	6	1	1
Gabbro	-9	1	250	3.1	6	1	0.05
Gabbro	-9	1	300	1.8	6	1	-0.6
Gabbro	-9	1	350	0.8	6	1	-1.1
Gabbro	-9	1	400	0	6	1	-1.5
Gabbro	-9	1	450	-0.8	6	1	-1.9
Gabbro	-9	3	200	5	6	1	-1.5
Gabbro	-9	3	250	3.1	6	1	-2.925
Gabbro	-9	3	300	1.8	6	1	-3.9
Gabbro	-9	3	350	0.8	6	1	-4.65
Gabbro	-9	3	400	0	6	1	-5.25
Gabbro	-9	3	450	-0.8	6	1	-5.85
Gabbro	-9	10	200	5	6	1	-3.09091
Gabbro	-9	10	250	3.1	6	1	-4.81818
Gabbro	-9	10	300	1.8	6	1	-6
Gabbro	-9	10	350	0.8	6	1	-6.90909
Gabbro	-9	10	400	0	6	1	-7.63636
Gabbro	-9	10	450	-0.8	6	1	-8.36364
Gabbro	-8	0.1	200	5	6	1	5.18182
Gabbro	-8	0.1	250	3.1	6	1	5.00909
Gabbro	-8	0.1	300	1.8	6	1	4.89091
Gabbro	-8	0.1	350	0.8	6	1	4.8
Gabbro	-8	0.1	400	0	6	1	4.72727
Gabbro	-8	0.1	450	-0.8	6	1	4.65455
Gabbro	-8	1	200	5	6	1	1.5
Gabbro	-8	1	250	3.1	6	1	0.55
Gabbro	-8	1	300	1.8	6	1	-0.1
Gabbro	-8	1	350	0.8	6	1	-0.6
Gabbro	-8	1	400	0	6	1	-1
Gabbro	-8	1	450	-0.8	6	1	-1.4
Gabbro	-8	3	200	5	6	1	-0.75
Gabbro	-8	3	250	3.1	6	1	-2.175
Gabbro	-8	3	300	1.8	6	1	-3.15
Gabbro	-8	3	350	0.8	6	1	-3.9
Gabbro	-8	3	400	0	6	1	-4.5
Gabbro	-8	3	450	-0.8	6	1	-5.1
Gabbro	-8	10	200	5	6	1	-2.18182
Gabbro	-8	10	250	3.1	6	1	-3.90909
Gabbro	-8	10	300	1.8	6	1	-5.09091
Gabbro	-8	10	350	0.8	6	1	-6
Gabbro	-8	10	400	0	6	1	-6.72727
Gabbro	-8	10	450	-0.8	6	1	-7.45455
Gabbro	-7	0.1	200	5	6	1	5.27273
Gabbro	-7	0.1	250	3.1	6	1	5.1
Gabbro	-7	0.1	300	1.8	6	1	4.98182
Gabbro	-7	0.1	350	0.8	6	1	4.89091
Gabbro	-7	0.1	400	0	6	1	4.81818
Gabbro	-7	0.1	450	-0.8	6	1	4.74545
Gabbro	-7	1	200	5	6	1	2
Gabbro	-7	1	250	3.1	6	1	1.05
Gabbro	-7	1	300	1.8	6	1	0.4
Gabbro	-7	1	350	0.8	6	1	-0.1
Gabbro	-7	1	400	0	6	1	-0.5
Gabbro	-7	1	450	-0.8	6	1	-0.9
Gabbro	-7	3	200	5	6	1	0
Gabbro	-7	3	250	3.1	6	1	-1.425
Gabbro	-7	3	300	1.8	6	1	-2.4
Gabbro	-7	3	350	0.8	6	1	-3.15
Gabbro	-7	3	400	0	6	1	-3.75
Gabbro	-7	3	450	-0.8	6	1	-4.35
Gabbro	-7	10	200	5	6	1	-1.27273
Gabbro	-7	10	250	3.1	6	1	-3
Gabbro	-7	10	300	1.8	6	1	-4.18182
Gabbro	-7	10	350	0.8	6	1	-5.09091
Gabbro	-7	10	400	0	6	1	-5.81818
Gabbro	-7	10	450	-0.8	6	1	-6.54545
Gabbro	-6	0.1	200	5	6	1	5.36364
Gabbro	-6	0.1	250	3.1	6	1	5.19091
Gabbro	-6	0.1	300	1.8	6	1	5.07273
Gabbro	-6	0.1	350	0.8	6	1	4.98182
Gabbro	-6	0.1	400	0	6	1	4.90909
Gabbro	-6	0.1	450	-0.8	6	1	4.83636
Gabbro	-6	1	200	5	6	1	2.5
Gabbro	-6	1	250	3.1	6	1	1.55
Gabbro	-6	1	300	1.8	6	1	0.9
Gabbro	-6	1	350	0.8	6	1	0.4
Gabbro	-6	1	400	0	6	1	0
Gabbro	-6	1	450	-0.8	6	1	-0.4
Gabbro	-6	3	200	5	6	1	0.75
Gabbro	-6	3	250	3.1	6	1	-0.675
Gabbro	-6	3	300	1.8	6	1	-1.65
Gabbro	-6	3	350	0.8	6	1	-2.4
Gabbro	-6	3	400	0	6	1	-3
Gabbro	-6	3	450	-0.8	6	1	-3.6
Gabbro	-6	10	200	5	6	1	-0.363636
Gabbro	-6	10	250	3.1	6	1	-2.09091
Gabbro	-6	10	300	1.8	6	1	-3.27273
Gabbro	-6	10	350	0.8	6	1	-4.18182
Gabbro	-6	10	400	0	6	1	-4.90909
Gabbro	-6	10	450	-0.8	6	1	-5.63636
Gabbro	-5	0.1	200	5	6	1	5.45455
Gabbro	-5	0.1	250	3.1	6	1	5.28182
Gabbro	-5	0.1	300	1.8	6	1	5.16364
Gabbro	-5	0.1	350	0.8	6	1	5.07273
Gabbro	-5	0.1	400	0	6	1	5
Gabbro	-5	0.1	450	-0.8	6	1	4.92727
Gabbro	-5	1	200	5	6	1	3
Gabbro	-5	1	250	3.1	6	1	2.05
Gabbro	-5	1	300	1.8	6	1	1.4
Gabbro	-5	1	350	0.8	6	1	0.9
Gabbro	-5	1	400	0	6	1	0.5
Gabbro	-5	1	450	-0.8	6	1	0.1
Gabbro	-5	3	200	5	6	1	1.5
Gabbro	-5	3	250	3.1	6	1	0.075
Gabbro	-5	3	300	1.8	6	1	-0.9
Gabbro	-5	3	350	0.8	6	1	-1.65
Gabbro	-5	3	400	0	6	1	-2.25
Gabbro	-5	3	450	-0.8	6	1	-2.85
Gabbro	-5	10	200	5	6	1	0.545455
Gabbro	-5	10	250	3.1	6	1	-1.18182
Gabbro	-5	10	300	1.8	6	1	-2.36364
Gabbro	-5	10	350	0.8	6	1	-3.27273
Gabbro	-5	10	400	0	6	1	-4
Gabbro	-5	10	450	-0.8	6	1	-4.72727
Gabbro	-4	0.1	200	5	6	1	5.54545
Gabbro	-4	0.1	250	3.1	6	1	5.37273
Gabbro	-4	0.1	300	1.8	6	1	5.25455
Gabbro	-4	0.1	350	0.8	6	1	5.16364
Gabbro	-4	0.1	400	0	6	1	5.09091
Gabbro	-4	0.1	450	-0.8	6	1	5.01818
Gabbro	-4	1	200	5	6	1	3.5
Gabbro	-4	1	250	3.1	6	1	2.55
Gabbro	-4	1	300	1.8	6	1	1.9
Gabbro	-4	1	350	0.8	6	1	1.4
Gabbro	-4	1	400	0	6	1	1
Gabbro	-4	1	450	-0.8	6	1	0.6
Gabbro	-4	3	200	5	6	1	2.25
Gabbro	-4	3	250	3.1	6	1	0.825
Gabbro	-4	3	300	1.8	6	1	-0.15
Gabbro	-4	3	350	0.8	6	1	-0.9
Gabbro	-4	3	400	0	6	1	-1.5
Gabbro	-4	3	450	-0.8	6	1	-2.1
Gabbro	-4	10	200	5	6	1	1.45455
Gabbro	-4	10	250	3.1	6	1	-0.272727
Gabbro	-4	10	300	1.8	6	1	-1.45455
Gabbro	-4	10	350	0.8	6	1	-2.36364
Gabbro	-4	10	400	0	6	1	-3.09091
Gabbro	-4	10	450	-0.8	6	1	-3.81818
Gabbro	-3	0.1	200	5	6	1	5.63636
Gabbro	-3	0.1	250	3.1	6	1	5.46364
Gabbro	-3	0.1	300	1.8	6	1	5.34545
Gabbro	-3	0.1	350	0.8	6	1	5.25455
Gabbro	-3	0.1	400	0	6	1	5.18182
Gabbro	-3	0.1	450	-0.8	6	1	5.10909
Gabbro	-3	1	200	5	6	1	4
Gabbro	-3	1	250	3.1	6	1	3.05
Gabbro	-3	1	300	1.8	6	1	2.4
Gabbro	-3	1	350	0.8	6	1	1.9
Gabbro	-3	1	400	0	6	1	1.5
Gabbro	-3	1	450	-0.8	6	1	1.1
Gabbro	-3	3	200	5	6	1	3
Gabbro	-3	3	250	3.1	6	1	1.575
Gabbro	-3	3	300	1.8	6	1	0.6
Gabbro	-3	3	350	0.8	6	1	-0.15
Gabbro	-3	3	400	0	6	1	-0.75
Gabbro	-3	3	450	-0.8	6	1	-1.35
Gabbro	-3	10	200	5	6	1	2.36364
Gabbro	-3	10	250	3.1	6	1	0.636364
Gabbro	-3	10	300	1.8	6	1	-0.545455
Gabbro	-3	10	350	0.8	6	1	-1.45455
Gabbro	-3	10	400	0	6	1	-2.18182
Gabbro	-3	10	450	-0.8	6	1	-2.90909
Gabbro	-2	0.1	200	5	6	1	5.72727
Gabbro	-2	0.1	250	3.1	6	1	5.55455
Gabbro	-2	0.1	300	1.8	6	1	5.43636
Gabbro	-2	0.1	350	0.8	6	1	5.34545
Gabbro	-2	0.1	400	0	6	1	5.27273
Gabbro	-2	0.1	450	-0.8	6	1	5.2
Gabbro	-2	1	200	5	6	1	4.5
Gabbro	-2	1	250	3.1	6	1	3.55
Gabbro	-2	1	300	1.8	6	1	2.9
Gabbro	-2	1	350	0.8	6	1	2.4
Gabbro	-2	1	400	0	6	1	2
Gabbro	-2	1	450	-0.8	6	1	1.6
Gabbro	-2	3	200	5	6	1	3.75
Gabbro	-2	3	250	3.1	6	1	2.325
Gabbro	-2	3	300	1.8	6	1	1.35
Gabbro	-2	3	350	0.8	6	1	0.6
Gabbro	-2	3	400	0	6	1	0
Gabbro	-2	3	450	-0.8	6	1	-0.6
Gabbro	-2	10	200	5	6	1	3.27273
Gabbro	-2	10	250	3.1	6	1	1.54545
Gabbro	-2	10	300	1.8	6	1	0.363636
Gabbro	-2	10	350	0.8	6	1	-0.545455
Gabbro	-2	10	400	0	6	1	-1.27273
Gabbro	-2	10	450	-0.8	6	1	-2
Gabbro	-1	0.1	200	5	6	1	5.81818
Gabbro	-1	0.1	250	3.1	6	1	5.64545
Gabbro	-1	0.1	300	1.8	6	1	5.52727
Gabbro	-1	0.1	350	0.8	6	1	5.43636
Gabbro	-1	0.1	400	0	6	1	5.36364
Gabbro	-1	0.1	450	-0.8	6	1	5.29091
Gabbro	-1	1	200	5	6	1	5
Gabbro	-1	1	250	3.1	6	1	4.05
Gabbro	-1	1	300	1.8	6	1	3.4
Gabbro	-1	1	350	0.8	6	1	2.9
Gabbro	-1	1	400	0	6	1	2.5
Gabbro	-1	1	450	-0.8	6	1	2.1
Gabbro	-1	3	200	5	6	1	4.5
Gabbro	-1	3	250	3.1	6	1	3.075
Gabbro	-1	3	300	1.8	6	1	2.1
Gabbro	-1	3	350	0.8	6	1	1.35
Gabbro	-1	3	400	0	6	1	0.75
Gabbro	-1	3	450	-0.8	6	1	0.15
Gabbro	-1	10	200	5	6	1	4.18182
Gabbro	-1	10	250	3.1	6	1	2.45455
Gabbro	-1	10	300	1.8	6	1	1.27273
Gabbro	-1	10	350	0.8	6	1	0.363636
Gabbro	-1	10	400	0	6	1	-0.363636
Gabbro	-1	10	450	-0.8	6	1	-1.09091
Gabbro	0	0.1	200	5	6	1	5.90909
Gabbro	0	0.1	250	3.1	6	1	5.73636
Gabbro	0	0.1	300	1.8	6	1	5.61818
Gabbro	0	0.1	350	0.8	6	1	5.52727
Gabbro	0	0.1	400	0	6	1	5.45455
Gabbro	0	0.1	450	-0.8	6	1	5.38182
Gabbro	0	1	200	5	6	1	5.5
Gabbro	0	1	250	3.1	6	1	4.55
Gabbro	0	1	300	1.8	6	1	3.9
Gabbro	0	1	350	0.8	6	1	3.4
Gabbro	0	1	400	0	6	1	3
Gabbro	0	1	450	-0.8	6	1	2.6
Gabbro	0	3	200	5	6	1	5.25
Gabbro	0	3	250	3.1	6	1	3.825
Gabbro	0	3	300	1.8	6	1	2.85
Gabbro	0	3	350	0.8	6	1	2.1
Gabbro	0	3	400	0	6	1	1.5
Gabbro	0	3	450	-0.8	6	1	0.9
Gabbro	0	10	200	5	6	1	5.09091
Gabbro	0	10	250	3.1	6	1	3.36364
Gabbro	0	10	300	1.8	6	1	2.18182
Gabbro	0	10	350	0.8	6	1	1.27273
Gabbro	0	10	400	0	6	1	0.545455
Gabbro	0	10	450	-0.8	6	1	-0.181818
