# Supplementary material
Source: Research Square preprint supplement (doi:10.21203/rs.3.rs-10142139/v1)
Supplement: Supplementary file 4 [file da55775c9d9e557b62f0d732.xlsx]

## Sheet: Table S2
Table S2. Compiled zircon Hf–O isotope compositions and apparent crystallisation depths of Neoproterozoic low-δ¹⁸O magmatic regions
Sample information		Zircon U–Pb and Lu–Hf isotope data						Zircon oxygen isotope data		Apparent crystallisation pressure/depth							References
Region	Analysis no.	206Pb/238U age	±2σ	176Lu/177Hf	TDM2	εHf(t)	±2σ	δ18O	±2σ	Best-fit P	Lower P	Upper P	Best-fit depth	Lower depth	Upper depth		Region	Reference
		Ma	Ma		Ma			‰	‰	GPa	GPa	GPa	km	km	km		South China	Yang, Y.N., Wang, X.C., Li, Q.L., Li, X.H., 2016. Integrated in situ U–Pb age and Hf–O analyses of zircon from Suixian Group in northern Yangtze: New insights into the Neoproterozoic low-δ18O magmas in the South China Block. Precambrian Res. 273, 151-164. doi:10.1016/j.precamres.2015.12.008
South China	12SZ20@01	769.174	11.473	0.00139333	1779.42	-5.60295	1.37414	3.33556	0.240124	0.136789	0.090623	0.188362	4.97994	3.29922	6.85751			Zou, H., Bagas, L., Li, X.Y., Liu, H., Jiang, X.W., Li, Y., 2020. Origin and evolution of the Neoproterozoic Dengganping Granitic Complex in the western margin of the Yangtze Block, SW China: Implications for breakup of Rodina Supercontinent. Lithos 370-371, 105602. doi:10.1016/j.lithos.2020.105602
South China	12SZ20@03	746.43	10.6267	0.0027099	1805.7	-6.49213	1.29478	5.27596	0.285913	0.00294483	0.00148058	0.00526319	0.107209	0.053902	0.191612			Qi, H., Zhao, J., 2020. Petrogenesis of the Neoproterozoic low-δ18O granitoids at the western margin of the Yangtze Block in South China. Precambrian Res. 351, 105953. doi:10.1016/j.precamres.2020.105953
South China	12SZ20@04	733.571	10.8006	0.00135377	1845.79	-7.48558	1.30589	2.5145	0.330193	0.153515	0.10255	0.209743	5.58885	3.73345	7.63592			This study
South China	12SZ20@07	719.342	10.2182	0.00158683	1655.5	-3.94485	1.4691	4.74627	0.222098	0.0778139	0.0495034	0.111338	2.83289	1.80222	4.05337		Northern Madagascar	Armistead, S.E., Collins, A.S., Merdith, A.S., et al., 2019. Evolving Marginal Terranes During Neoproterozoic Supercontinent Reorganization: Constraints From the Bemarivo Domain in Northern Madagascar. Tectonics, 38 (6): 2019-2035.
South China	12SZ20@08	739.463	10.5353	0.00152837	1719.02	-4.88088	1.54975	5.1392	0.205039	0.0922738	0.059426	0.130508	3.35932	2.16346	4.75126		India/Malani	Wang, W., Cawood, P.A., Pandit, M.K., et al., 2019. Coupled Precambrian crustal evolution and supercontinent cycles: Insights from in-situ U-Pb, O- and Hf-isotopes in detrital zircon, NW india. American Journal of Science, 318 (10): 989-1017.
South China	12SZ20@09	746.063	10.6387	0.00162983	1768.09	-5.74785	1.41808	3.43999	0.270734	0.0686456	0.043279	0.0990597	2.49911	1.57562	3.60637		Central Madagascar	Archibald, D.B., Collins, A.S., Foden, J.D., et al., 2016. Genesis of the Tonian Imorona–Itsindro magmatic Suite in central Madagascar: Insights from U–Pb, oxygen and hafnium isotopes in zircon. Precambrian Research, 281: 312-337.
South China	12SZ20@10	733	10.4379	0.00173291	1774.99	-6.09302	1.36062	1.79462	0.365824	0.0508262	0.0313597	0.0748583	1.85038	1.14168	2.72529			Zhou, J.L., Li, X.H., Tang, G.Q., et al., 2018. New evidence for a continental rift tectonic setting of the Neoproterozoic Imorona-Itsindro Suite (central Madagascar). Precambrian Research, 306: 94-111.
South China	12SZ20@11	744.638	10.5799	0.00157728	1655.99	-3.55133	1.67131	3.87338	0.309257	0.080011	0.0510031	0.114265	2.91288	1.85682	4.15994		Arabian–Nubian Shield	Gamal El Dien, H., Li, Z., Abu Anbar, M., Doucet, L.S., Murphy, J.B., Evans, N.J., Xia, X., Li, J. 2021. Two-stage crustal growth in the Arabian-Nubian shield: Initial arc accretion followed by plume-induced crustal reworking, Precambrian Res. 359: 106211. doi:10.1016/j.precamres.2021.106211
South China	12SZ20@12	747.17	10.5913	0.00402915	1744.18	-5.26669	1.67044	3.32376	0.413188	6.29037e-05	2.39878e-05	0.000145997	0.00229007	0.000873298	0.00531515			Li, X.H., Abd El Rahman, Y., Abu Anbar, M., Li, J., Ling, X.X., Wu, L.G., Masoud, A.E. 2018. Old Continental Crust Underlying Juvenile Oceanic Arc: Evidence From Northern Arabian‐Nubian Shield, Egypt, Geophys. Res. Lett. 45 (7): 3001-3008. doi:10.1002/2018GL077121
South China	12SZ20@13	737.282	10.6109	0.00232208	2030.04	-11.0919	1.45035	2.82244	0.156381	0.0091224	0.0049748	0.0150987	0.33211	0.181112	0.549682			Blades, M.L., Alessio, B.L., Collins, A.S., Foden, J., Payne, J.L., Glorie, S., Holden, P., Thorpe, B., Al-Khirbash, S. 2020. Unravelling the Neoproterozoic accretionary history of Oman, using an array of isotopic systems in zircon, J. Geol. Soc. 177 (2): 357-378. doi:10.1144/jg
South China	12SZ20@14	718.057	10.2015	0.00158285	1772.44	-6.27979	1.48125	3.54706	0.390346	0.0787217	0.0501227	0.112548	2.86594	1.82477	4.09742		Iceland	Banik, T.J., Coble, M.A., Miller, C.F., et al., 2023. Petrogenesis and Geodynamic Evolution in the Northern Westfjords, Iceland, Elucidated by Iceland's Oldest Silicic Rocks. Journal of Geophysical Research: Solid Earth, 128 (6): e2022JB026265.
South China	12SZ20@15	718.058	10.2008	0.0017222	1799.21	-6.81099	1.84674	4.04561	0.292408	0.0524397	0.0324279	0.0770708	1.90912	1.18057	2.80584			Carley, T.L., Miller, C.F., Fisher, C.M., et al., 2020. Petrogenesis of Silicic Magmas in Iceland through Space and Time: The Isotopic Record Preserved in Zircon and Whole Rocks. The Journal of Geology, 128 (1): 1-28.
South China	12SZ20@16	746.335	10.5846	0.00143097	1811.23	-6.59742	1.299	5.62754	0.294367	0.122573	0.0805666	0.170049	4.46238	2.93311	6.19079		Australia/Stavely belt	Mole, D.R., Lewis, C.J., Bodorkos, S., et al., 2025. A slab origin for low-δ18O arc magmas. Geology, 53 (4): 311-316.
South China	12SZ24@01	749.709	10.6775	0.00404573	1949.74	-9.30823	1.46973	4.80072	0.391697	5.99354e-05	2.27765e-05	0.000139565	0.00218201	0.000829202	0.00508099
South China	12SZ24@02	739.021	10.4825	0.00316195	2231.8	-15.0923	1.53506	4.97117	0.301157	0.000788306	0.000360519	0.00154087	0.0286991	0.013125	0.0560971
South China	12SZ24@03	772.65	10.9317	0.00237446	1842.41	-6.80078	1.36388	3.46933	0.288576	0.00783037	0.00422358	0.0130954	0.285072	0.153764	0.47675
South China	12SZ24@04	843.353	11.8697	0.00273965	1061.58	9.73739	1.37384	6.02524	0.368944	0.00270021	0.00134916	0.00485451	0.0983038	0.0491174	0.176733
South China	12SZ24@05	726.793	10.4649	0.00695638	1723.24	-5.1911	1.70694	2.35796	0.275061	1.23687e-08	2.55413e-09	5.12603e-08	4.50295e-07	9.29858e-08	1.86618e-06
South China	12SZ24@06	771.129	11.008	0.00158572	1976.34	-9.48062	1.34082	5.07802	0.305907	0.0780654	0.049675	0.111673	2.84205	1.80847	4.06558
South China	12SZ24@07	790.623	11.1982	0.00345869	1390.66	2.41887	1.64402	3.70634	0.341509	0.000331875	0.000142627	0.000687973	0.0120822	0.00519249	0.0250463
South China	12SZ24@08	765.246	10.8328	0.0029546	1678.38	-3.67025	2.44097	1.43682	0.2525	0.0014429	0.000689191	0.0027069	0.0525302	0.0250907	0.0985476
South China	12SZ24@10	733.015	10.402	0.00375415	1017.62	8.82856	2.37324	3.17434	0.359818	0.00014024	5.66517e-05	0.000308237	0.00510559	0.00206246	0.0112217
South China	12SZ24@11	726.047	10.3536	0.00206849	2266.09	-15.9723	1.30845	5.48061	0.277182	0.0191068	0.0109883	0.030075	0.695603	0.400041	1.09491
South China	12SZ24@12	742.888	10.7295	0.00384464	1902.83	-8.48298	1.60585	4.26422	0.408052	0.000107719	4.2697e-05	0.00024104	0.00392163	0.00155443	0.00877529
South China	12SZ24@13	750.56	10.6367	0.00208183	1774.21	-5.79923	1.28004	1.83304	0.259814	0.018378	0.0105397	0.0290043	0.669069	0.383708	1.05593
South China	12SZ24@14	779.994	11.0727	0.00277785	1305.04	3.93634	1.3977	4.68915	0.222214	0.00241564	0.00119735	0.00437589	0.087944	0.0435908	0.159309
South China	12SZ28@01	757.873	10.7342	0.00131032	1877.9	-7.73549	1.23248	3.93515	0.324839	0.174245	0.117464	0.236028	6.34358	4.27638	8.59283
South China	12SZ28@02	737.733	10.5081	0.00231265	1499.39	-0.569524	1.24176	4.43884	0.212638	0.00937671	0.00512359	0.0154906	0.341368	0.18653	0.563951
South China	12SZ28@03	771.715	11.3039	0.0025676	1693.93	-3.87344	1.28164	1.57629	0.228499	0.00445908	0.00230976	0.00774806	0.162337	0.0840893	0.282076
South China	12SZ28@04	744.577	10.5633	0.00149296	2019.71	-10.7648	1.22654	5.47814	0.251679	0.102309	0.0663794	0.143689	3.72465	2.41661	5.23115
South China	12SZ28@05	741.944	10.5213	0.00267676	1901.79	-8.47063	1.30795	2.80459	0.371572	0.00324358	0.00164215	0.0057592	0.118086	0.059784	0.209669
South China	12SZ28@06	758.199	11.0443	0.00130644	2026.99	-10.6917	1.27932	3.85586	0.261137	0.176228	0.118897	0.23853	6.41575	4.32855	8.68391
South China	12SZ28@07	733.404	10.4485	0.00353415	1641.31	-3.44683	1.29758	5.67214	0.362749	0.000266331	0.000112663	0.000560416	0.00969606	0.00410162	0.0204025
South China	12SZ28@08	1840.29	14.6634	0.00048731	2762.23	-8.01124	1.41835	7.55973	0.319241	1.91968	1.53769	2.20921	69.8877	55.9811	80.4285
South China	12SZ28@09	744.91	10.5685	0.00322824	1946.36	-9.3122	1.38702	2.84249	0.211341	0.000649769	0.000293062	0.00128687	0.0236555	0.0106692	0.0468497
South China	12SZ28@10	731.5	10.3813	0.00150569	1813.61	-6.88138	1.23896	3.58955	0.274826	0.0985811	0.0637905	0.138803	3.58894	2.32236	5.05328
South China	12SZ28@13	732.02	10.7138	0.00220985	1879.37	-8.18086	1.27713	3.90473	0.235255	0.0126535	0.00706466	0.0204827	0.460664	0.257196	0.745693
South China	12SZ28@14	755.579	12.3344	0.00159881	1816.31	-6.55163	1.31392	4.71413	0.283905	0.0751422	0.0476839	0.107771	2.73563	1.73598	3.9235
South China	12SZ28@15	752.972	10.6694	0.00158652	1690.12	-4.09358	1.26295	4.14411	0.232954	0.0778844	0.0495515	0.111432	2.83546	1.80397	4.05679
South China	12SZ28@16	740.195	10.4978	0.00257493	1837.37	-7.21916	1.26576	1.92987	0.166753	0.00436473	0.00225742	0.00759516	0.158902	0.0821837	0.276509
South China	12SZ28@17	746.193	10.5782	0.00242511	1650.36	-3.41788	1.44623	3.06043	0.303542	0.00675537	0.00360528	0.0114115	0.245936	0.131254	0.415446
South China	12SZ28@18	720.648	10.3156	0.00103207	1115.12	6.71993	1.2707	5.2647	0.352699	0.392165	0.280241	0.502731	14.2771	10.2025	18.3024
South China	12SZ28@19	766.331	10.8471	0.00255501	1788.39	-5.83082	1.28738	1.71918	0.224078	0.0046257	0.0024024	0.00801758	0.168403	0.0874618	0.291888
South China	12SZ06@01	776.118	11.3423	0.0016691	1103.86	7.82908	1.30353	5.96003	0.373799	0.0612188	0.0382803	0.0890323	2.22873	1.39363	3.24131
South China	12SZ06@02	794.667	11.2759	0.00208756	1172.37	6.78101	1.31672	6.42554	0.29536	0.018074	0.0103529	0.0285568	0.658001	0.376908	1.03964
South China	12SZ06@03	772.333	10.9374	0.00105455	1260.82	4.68557	1.28203	4.69654	0.306104	0.367292	0.261234	0.472946	13.3716	9.51048	17.2181
South China	12SZ06@04	777.992	11.0175	0.0023737	1430.27	1.43756	1.29947	5.96923	0.371944	0.00784782	0.00423368	0.0131226	0.285708	0.154131	0.47774
South China	12SZ06@05	804.866	11.5396	0.00144338	1185.94	6.67846	1.30044	6.16123	0.373897	0.118217	0.0775021	0.16441	4.30382	2.82154	5.98551
South China	12SZ06@06	929.115	13.7542	0.0013002	1023.13	11.8716	1.33346	5.49197	0.326457	0.179466	0.12124	0.242612	6.53362	4.41385	8.83252
South China	12SZ06@07	791.792	11.1862	0.00212578	1167.63	6.82817	1.34769	7.26985	0.301968	0.016168	0.00918726	0.0257395	0.588611	0.334472	0.937073
South China	12SZ06@08	761.966	10.8397	0.00117784	1164.29	6.41632	1.26276	5.72536	0.401025	0.256391	0.177705	0.338305	9.33416	6.46954	12.3163
South China	12SZ06@09	753.665	10.7277	0.00119535	1240.55	4.78515	1.32693	5.08702	0.240226	0.243629	0.168242	0.322583	8.86955	6.125	11.744
South China	12SZ06@10	783.267	11.7378	0.00134417	2000.03	-9.75696	1.29691	5.3673	0.436508	0.157871	0.105673	0.215286	5.74746	3.84713	7.83771
South China	12SZ06@11	810.041	11.594	0.00189826	1207.23	6.34258	1.33422	4.99726	0.211504	0.0313856	0.0187053	0.0477644	1.14262	0.680987	1.73891
South China	12SZ06@12	797.917	11.2675	0.00159892	1275.74	4.80134	1.31313	5.24711	0.336101	0.0751196	0.0476685	0.10774	2.7348	1.73542	3.9224
South China	12SZ06@13	822.142	11.5886	0.0014181	1514.32	0.486989	1.30034	6.059	0.309933	0.127259	0.083873	0.176101	4.633	3.05348	6.41114
South China	12SZ06@14	808.463	11.4654	0.00160119	1214.12	6.1821	1.27933	5.38824	0.186343	0.0746232	0.0473309	0.107077	2.71673	1.72313	3.89823
South China	12SZ06@15	801.818	11.3363	0.0013866	961.47	11.0327	1.32945	5.61066	0.35014	0.1395	0.0925492	0.191839	5.07862	3.36934	6.98408
South China	12SZ06@16	799.434	11.288	0.00156679	1214.59	6.02826	1.31057	5.7513	0.349141	0.0824945	0.0527019	0.117568	3.0033	1.91867	4.28017
South China	12SZ06@17	827.863	11.6664	0.000939957	1340.05	4.01573	1.24328	6.92674	0.374933	0.512983	0.373723	0.645724	18.6757	13.6058	23.5082
South China	12SZ06@18	2003.44	15.2854	0.000397264	2977.26	-9.70703	1.4559	7.03247	0.301521	2.49599	2.0374	2.82167	90.8689	74.1737	102.726
South China	12SZ06@19	761.806	10.7884	0.00052609	1067.86	8.30625	1.28895	4.6721	0.245833	1.71446	1.36219	1.98825	62.4165	49.5919	72.3843
South China	12SZ06@20	823.294	11.6298	0.00135657	1119.7	8.27493	1.29766	6.36171	0.447633	0.152266	0.101657	0.208153	5.54339	3.70091	7.57801
South China	12SZ06@21	800.026	11.3019	0.000981824	1293.97	4.47685	1.29759	5.64457	0.234864	0.454038	0.327891	0.576285	16.5297	11.9372	20.9802
South China	12SZ06@22	785.494	11.2076	0.00165061	1282.28	4.47359	1.30242	5.9797	0.336596	0.0646108	0.0405582	0.0936217	2.35222	1.47656	3.40839
South China	12SZ06@23	765.243	10.8566	0.00266148	1005.61	9.58083	1.30505	5.42764	0.218181	0.00339133	0.00172246	0.00600335	0.123465	0.0627077	0.218558
South China	12SZ06@24	741.584	10.8364	0.00194385	1172.26	5.93296	1.28183	5.18277	0.265318	0.0274792	0.0162215	0.0421987	1.00041	0.590559	1.53629
South China	12SZ06@25	847.11	13.9492	0.00209097	1135.96	8.33779	1.32492	7.10029	0.34925	0.017895	0.010243	0.0282931	0.651484	0.372908	1.03004
South China	12SZ06@26	798.854	11.3983	0.000891039	1094.15	8.38443	1.28484	6.37767	0.306286	0.591618	0.435452	0.737526	21.5384	15.853	26.8504
South China	12SZ06@27	832.324	11.7653	0.00108787	1446.08	1.99722	1.2816	5.9817	0.396335	0.333284	0.235396	0.431998	12.1335	8.56984	15.7273
South China	12SZ07@01	858.571	12.1543	0.000768516	973.307	11.7129	1.2971	6.01123	0.262039	0.84562	0.638593	1.0289	30.7856	23.2486	37.4581
South China	12SZ07@02	803.443	11.3409	0.00131846	1247.37	5.448	1.28555	5.95288	0.343855	0.17016	0.114514	0.230865	6.19483	4.16899	8.40487
South China	12SZ07@03	762.148	10.8569	0.00197741	1203.75	5.64363	1.2557	5.45318	0.236526	0.0249179	0.0146064	0.0385207	0.907161	0.531761	1.40238
South China	12SZ07@04	1987.8	19.8135	0.00053954	2991.92	-10.2612	1.4988	6.99417	0.256556	1.64853	1.30612	1.91689	60.0163	47.5507	69.7865
South China	12SZ07@05	793.037	11.2029	0.000614705	1313.56	3.97987	1.3326	5.84865	0.307586	1.32411	1.0327	1.56276	48.2057	37.5963	56.8939
South China	12SZ07@06	2010.6	21.0976	0.000269271	3020.96	-10.4778	1.56827	7.02459	0.21924	3.62495	3.03938	3.99536	131.97	110.652	145.455
South China	12SZ07@07	817.195	11.5847	0.000878921	1408.46	2.49711	1.27753	7.53028	0.19128	0.612893	0.452258	0.762217	22.313	16.4649	27.7493
South China	12SZ07@08	2019.31	15.8065	0.000634523	2966.37	-9.2274	1.43549	7.02908	0.225954	1.24978	0.970678	1.48083	45.4993	35.3385	53.9109
South China	12SZ07@09	741.724	10.6415	0.00224976	1789.84	-6.25068	1.26429	3.01352	0.241148	0.0112634	0.00623617	0.0183772	0.410057	0.227034	0.669042
South China	12SZ07@10	811.619	11.4501	0.00282803	1611.36	-1.60244	1.32464	5.41727	0.233615	0.00208683	0.00102355	0.00381801	0.0759732	0.0372633	0.138999
South China	12SZ07@11	801.12	11.3101	0.00112489	1183.65	6.66339	1.28435	6.64359	0.280895	0.299186	0.20968	0.390655	10.8922	7.63363	14.2222
South China	12SZ07@12	785.884	11.1701	0.00252025	2336.44	-16.4317	1.3679	5.49507	0.331121	0.00511906	0.00267807	0.00881182	0.186364	0.0974977	0.320803
South China	12SZ07@13	748.794	10.7461	0.00178262	1246.67	4.58635	1.32852	6.45109	0.251637	0.0439701	0.0268483	0.0654009	1.60077	0.97744	2.38099
South China	12SZ07@14	771.152	10.9116	0.000974439	1294.22	4.00969	1.27214	5.2158	0.272577	0.463919	0.335545	0.587966	16.8894	12.2159	21.4055
South China	12SZ07@15	797.676	11.2643	0.000768737	1310.42	4.11575	1.26337	5.14847	0.275195	0.845074	0.638151	1.02828	30.7658	23.2325	37.4356
South China	12SZ07@16	802.271	11.3253	0.00114932	1170.01	6.94985	1.28136	7.10588	0.248208	0.27862	0.19427	0.365566	10.1435	7.07261	13.3088
South China	12SZ07@17	708.706	10.088	0.00209598	1036.62	8.06734	1.2433	5.14997	0.262936	0.0176356	0.010084	0.0279108	0.642043	0.367119	1.01612
South China	12SZ07@18	741.516	10.9854	0.00132935	1926.15	-8.95355	1.34297	6.03168	0.275778	0.164842	0.110682	0.224133	6.00124	4.0295	8.1598
South China	12SZ07@19	797.574	11.3193	0.00134691	2322.46	-15.9553	1.31445	6.04714	0.251872	0.156616	0.104773	0.213691	5.70177	3.81436	7.77962
South China	12SZ07@20	872.487	12.2757	0.0020459	1311.67	5.28936	1.31203	8.4459	0.293928	0.0204076	0.0117921	0.0319791	0.74296	0.429304	1.16423
South China	12SZ07@21	1675.3	29.8251	0.00040061	2764.51	-10.7399	1.80675	6.3678	0.239743	2.47175	2.01621	2.79612	89.9865	73.402	101.796
South China	12SZ07@22	789.368	11.1539	0.00146739	1082.74	8.456	1.31704	6.69844	0.327497	0.110227	0.0719011	0.154028	4.01292	2.61763	5.60754
South China	12SZ07@24	803.504	11.3643	0.00259219	2326.2	-15.9476	1.32438	5.78232	0.327809	0.00415058	0.00213892	0.00724723	0.151106	0.0778694	0.263843
South China	12SZ07@25	776.968	10.9934	0.00214003	2211.63	-14.0772	1.33333	3.38755	0.295106	0.0155103	0.00878725	0.0247622	0.564666	0.319909	0.901492
South China	12SZ07@26	779.941	11.1125	0.000938734	2084.19	-11.4816	1.26374	5.38685	0.263312	0.514815	0.375154	0.647874	18.7424	13.6579	23.5865
South China	12SZ07@27	1978.67	29.7385	0.000285134	3032.73	-11.2387	1.8245	6.96076	0.303444	3.46112	2.89239	3.8268	126.006	105.3	139.318
South China	12SZ07@28	1984.31	20.5614	0.00064057	3001.66	-10.5166	1.55008	6.97123	0.313093	1.22794	0.952509	1.45669	44.7043	34.6771	53.0324
South China	12SZ07@29	785.712	11.1053	0.000711626	1275.97	4.60217	1.29042	5.55043	0.205085	0.998178	0.762842	1.20091	36.3397	27.772	43.7205
South China	12SZ07@30	781.12	11.1465	0.00168019	2386.75	-17.5049	1.32377	5.72747	0.297916	0.0592718	0.0369769	0.0863902	2.15785	1.34618	3.14512
South China	12SZ07@31	784.123	11.2916	0.0034858	2115.13	-12.0494	1.37886	3.65735	0.271259	0.000306654	0.000131042	0.000639112	0.011164	0.00477071	0.0232675
South China	12SZ07@32	1977.1	18.6996	0.00031192	3053.77	-11.6923	1.47563	6.53587	0.357595	3.20111	2.66013	3.55814	116.54	96.8447	129.538
South China	12SZ07@33	785.412	11.1493	0.000808298	1246.9	5.16897	1.28998	6.11197	0.197545	0.753017	0.563941	0.923473	27.4144	20.5308	33.62
South China	12SZ07@34	797.25	11.2768	0.00394767	1212.91	6.02441	1.37075	5.7534	0.31568	7.97696e-05	3.09432e-05	0.000182178	0.00290409	0.00112652	0.00663236
South China	12SZ07@35	2025.34	22.4758	0.000427638	3004.62	-9.90528	1.6421	6.64458	0.289354	2.28446	1.85291	2.59812	83.168	67.457	94.5872
South China	12SZ07@36	875.797	12.3458	0.00081612	952.137	12.4048	1.31106	5.81324	0.427889	0.73604	0.550323	0.904052	26.7963	20.0351	32.9129
South China	12SZ07@37	763.223	10.8478	0.000982572	990.675	9.8414	1.26631	4.55053	0.353228	0.453049	0.327125	0.575116	16.4937	11.9093	20.9377
South China	12SZ07@38	805.274	11.3653	0.00178492	2274.17	-14.8723	1.34926	5.55342	0.260521	0.0436758	0.0266558	0.0649929	1.59006	0.97043	2.36613
South China	12SZ07@39	778.798	11.0239	0.000616493	1317.04	3.68355	1.30863	6.04763	0.367409	1.31723	1.02694	1.55519	47.9551	37.3868	56.6182
South China	12SZ07@40	810.544	11.435	0.000967593	1189.08	6.70795	1.31879	6.65904	0.402853	0.473273	0.342802	0.599008	17.23	12.48	21.8075
South China	12SZ07@41	2738.91	9.72388	0.000436679	3150.74	-1.10322	1.32143	5.97233	0.450901	2.22503	1.80129	2.53506	81.0043	65.5777	92.2915
South China	12SZ07@42	798.84	11.3209	0.00142074	1142.44	7.43617	1.29862	6.72687	0.348974	0.126285	0.0831849	0.174844	4.59753	3.02843	6.36538
South China	12SZ07@43	2505.77	7.18928	0.00127637	3322.36	-8.49053	1.29408	5.96701	0.420381	0.192375	0.130611	0.258839	7.0036	4.75502	9.42329
South China	12SZ07@44	760.687	10.7718	0.00230147	1897.58	-8.08619	1.238	6.42881	0.319623	0.00968739	0.00530577	0.0159685	0.352679	0.193162	0.581348
South China	12SZ07@45	815.757	11.5041	0.000972765	1927.16	-7.78934	1.26719	10.5381	0.325506	0.466189	0.337305	0.590648	16.9721	12.2799	21.5031
South China	12SZ07@46	2024.91	15.7778	0.000305016	2977.28	-9.35627	1.40828	7.09508	0.254731	3.2662	2.71814	3.62553	118.909	98.9567	131.991
South China	13SZ14@01	833.109	11.7943	0.000869807	1375.08	3.4098	1.27211	6.30333	0.289938	0.629397	0.465324	0.78133	22.9138	16.9406	28.4451
South China	13SZ14@02	1017.81	19.066	0.00159578	1781.17	-1.66004	1.41982	10.2566	0.394137	0.07581	0.0481382	0.108663	2.75994	1.75252	3.95599
South China	13SZ14@03	822.435	11.9887	0.00253698	1802.42	-5.21355	1.34216	6.51379	0.210988	0.0048754	0.00254167	0.00842024	0.177494	0.092532	0.306547
South China	13SZ14@04	778.413	11.4823	0.00135484	1564.52	-1.20353	1.25218	5.68444	0.21076	0.153038	0.102209	0.209136	5.57149	3.72102	7.61381
South China	13SZ14@05	748.574	10.7322	0.00216709	1192.05	5.65596	1.31439	5.38273	0.12107	0.0143334	0.0080746	0.0230064	0.521823	0.293964	0.83757
South China	13SZ14@06	778.398	11.1477	0.00122387	1102.13	7.89963	1.27839	3.72454	0.309484	0.224193	0.153898	0.29853	8.16199	5.6028	10.8683
South China	13SZ14@07	839.496	12.582	0.000942756	1795.56	-4.79902	1.30659	9.97329	0.372957	0.508814	0.370469	0.640832	18.5239	13.4873	23.3301
South China	13SZ14@08	817.674	11.5354	0.000828761	1041.66	9.71595	1.24542	6.36567	0.321867	0.709407	0.529007	0.873524	25.8267	19.259	31.8015
South China	13SZ14@10	830.897	13.2694	0.00151846	1345.4	3.9584	1.35447	5.22364	0.246523	0.0949766	0.0612938	0.134067	3.45772	2.23146	4.88085
South China	13SZ14@11	777.981	11.5095	0.00168747	2197.95	-13.7844	1.29099	5.54082	0.321241	0.0580267	0.0361449	0.0846974	2.11252	1.31589	3.08349
South China	13SZ14@12	792.349	11.2456	0.00154098	1268.16	4.86127	1.29144	5.67148	0.259421	0.0889412	0.0571286	0.126109	3.23799	2.07982	4.59112
South China	13SZ14@13	803.744	11.3477	0.00109865	1087.17	8.59972	1.2951	6.99154	0.281273	0.32298	0.227605	0.419537	11.7584	8.28618	15.2737
South China	13SZ14@14	768.386	10.8879	0.00103689	928.526	11.141	1.23735	5.07702	0.312593	0.386692	0.276051	0.496189	14.0779	10.0499	18.0643
South China	13SZ14@15	787.596	11.3009	0.00100532	1400.15	2.18708	1.24419	5.29396	0.413271	0.423979	0.304679	0.540643	15.4354	11.0921	19.6826
South China	13SZ14@16	878.201	12.3269	0.00124031	1020.75	11.0987	1.29699	6.02605	0.229237	0.2137	0.14619	0.285486	7.77998	5.3222	10.3934
South China	13SZ14@17	807.054	11.3895	0.00064776	1711.64	-3.65358	1.29615	9.86208	0.328812	1.20246	0.931345	1.42851	43.7769	33.9066	52.0062
South China	13SZ14@18	780.306	11.052	0.000941351	1274.89	4.53649	1.23518	5.52885	0.386296	0.510903	0.372099	0.643283	18.5999	13.5466	23.4194
South China	13SZ14@20	805.796	11.4273	0.00346754	2435.48	-18.108	1.32251	5.5862	0.273134	0.000323415	0.000138734	0.000671613	0.0117742	0.00505075	0.0244507
South China	13SZ14@21	782.4	11.0765	0.00160643	1032.97	9.3202	1.25385	5.66649	0.363595	0.0734913	0.0465618	0.105562	2.67553	1.69513	3.8431
South China	13SZ14@22	802.715	13.2512	0.00214462	1280.85	4.77709	1.33212	5.17676	0.331369	0.015304	0.00866205	0.0244551	0.557157	0.315351	0.890312
South China	13SZ14@23	775.274	11.0381	0.00132994	1313.49	3.69608	1.2925	3.51109	0.376742	0.164559	0.110478	0.223774	5.99093	4.02208	8.14673
South China	13SZ14@24	2024.9	30.0154	0.000519138	2916.49	-8.12245	1.83496	7.50371	0.333999	1.74956	1.39211	2.02617	63.6944	50.681	73.7646
South China	13SZ14@25	2612.55	17.0635	0.000671	2812.02	3.70409	1.48378	5.93579	0.306352	1.12369	0.866105	1.34109	40.9091	31.5314	48.8236
South China	13SZ14@28	760.664	10.7768	0.000711894	1387.39	2.00832	1.26479	5.49793	0.234523	0.997396	0.762201	1.20004	36.3112	27.7487	43.6885
South China	13SZ14@29	747.324	11.3136	0.000745614	1089.65	7.64673	1.27413	5.39569	0.366493	0.90401	0.685973	1.09497	32.9114	24.9735	39.8634
South China	13SZ14@30	1004.45	37.0826	0.00146131	1612.29	1.47328	1.96349	10.0162	0.252471	0.112197	0.0732795	0.156593	4.08465	2.66781	5.70091
South China	13SZ19@01	742.369	10.5453	0.00156477	1576.07	-2.00759	1.30542	3.80029	0.386844	0.082983	0.0530365	0.118216	3.02108	1.93085	4.30378
South China	13SZ19@02	1994.64	13.8687	0.00201827	3053.67	-11.4114	1.33709	6.593	0.238991	0.02212	0.0128558	0.0344733	0.805302	0.46803	1.25503
South China	13SZ19@03	1990.74	24.7527	0.000461233	3088.53	-12.1772	1.66166	6.37826	0.360886	2.07132	1.66825	2.37144	75.4084	60.7342	86.3347
South China	13SZ19@04	790.363	11.6477	0.000937288	1280.21	4.59296	1.28025	5.56789	0.237723	0.51699	0.376853	0.650425	18.8216	13.7197	23.6794
South China	13SZ19@05	753.065	10.8585	0.000966299	1269.18	4.21292	1.26818	3.86519	0.341445	0.475061	0.34419	0.601117	17.2951	12.5306	21.8843
South China	13SZ19@06	760.376	11.0787	0.00133962	1202	5.65014	1.27098	5.24058	0.302994	0.15998	0.107187	0.217965	5.82422	3.90223	7.93523
South China	13SZ19@07	1718.59	27.013	0.00114308	2764.37	-10.0375	1.6826	6.06309	0.262779	0.283737	0.198097	0.37182	10.3297	7.21193	13.5365
South China	13SZ19@08	822.612	11.6584	0.000938083	2041.96	-9.96193	1.33262	9.19814	0.321901	0.515793	0.375918	0.64902	18.7779	13.6857	23.6282
South China	13SZ19@09	779.589	11.34	0.00195125	1120.16	7.56464	1.31394	6.77372	0.322796	0.0268928	0.0158507	0.0413588	0.979058	0.577061	1.50571
South China	13SZ19@10	801.686	11.3283	0.00120973	1180.22	6.73979	1.31952	6.07982	0.447031	0.233626	0.160848	0.31022	8.50537	5.85584	11.2939
South China	13SZ19@11	754.011	10.9332	0.000976757	1499.56	-0.309952	1.27932	6.33118	0.23165	0.460796	0.333124	0.584276	16.7757	12.1277	21.2711
South China	13SZ19@12	814.706	11.5864	0.000737417	1453.37	1.57194	1.27967	6.86457	0.24727	0.925874	0.703771	1.11963	33.7074	25.6215	40.7612
South China	13SZ19@13	790.026	11.2146	0.000643199	1284.34	4.50655	1.25946	5.57352	0.27882	1.21856	0.944715	1.44632	44.3629	34.3933	52.6548
South China	13SZ19@14	723.226	10.3956	0.0038628	2039.33	-11.5116	1.31238	3.74469	0.241285	0.000102166	4.03419e-05	0.000229436	0.00371944	0.00146869	0.00835285
South China	13SZ19@15	2020.25	24.6086	0.000347488	3060.13	-11.1168	1.62685	6.9284	0.406036	2.8858	2.3803	3.23034	105.06	86.657	117.604
South China	13SZ19@16	781.054	11.0609	0.00186871	961.448	10.6997	1.26738	3.11854	0.368042	0.0342096	0.0205151	0.0517583	1.24543	0.746871	1.88431
South China	13SZ19@17	2049.62	31.0392	0.000415588	2984.27	-9.09432	1.86785	6.81566	0.253773	2.36614	1.92401	2.68461	86.1417	70.0457	97.7357
South China	13SZ19@18	755.626	10.8595	0.00183417	1757.99	-5.39601	1.30733	7.1516	0.294201	0.0378344	0.0228537	0.0568523	1.3774	0.83201	2.06976
South China	13SZ19@19	1959.57	26.7504	0.000307895	3027.22	-11.4385	1.70922	6.87918	0.230486	3.2389	2.6938	3.59728	117.915	98.0705	130.962
South China	13SZ19@20	818.012	12.1733	0.00137712	1164.45	7.31134	1.28747	6.18817	0.291501	0.143409	0.0953323	0.196846	5.22097	3.47067	7.16636
South China	13SZ19@21	765.895	10.9628	0.000689115	1214.72	5.48902	1.26971	5.04375	0.262039	1.06588	0.818436	1.27667	38.8045	29.796	46.4783
South China	13SZ19@22	831.361	12.0426	0.00073795	1718.86	-3.4085	1.26836	8.75555	0.36037	0.924436	0.702599	1.11801	33.655	25.5788	40.7022
South China	13SZ19@23	2527.39	13.3905	0.000668896	3439.8	-10.5397	1.39428	6.13164	0.262378	1.1306	0.871817	1.34877	41.1608	31.7394	49.1034
South China	13SZ19@24	782.32	11.1665	0.00232949	1298.89	4.0952	1.30373	5.14621	0.212736	0.00892737	0.00486088	0.0147976	0.32501	0.176965	0.538721
South China	13SZ19@25	802.673	11.3451	0.0013662	1145.42	7.43917	1.32276	6.30644	0.383163	0.148048	0.0986413	0.202774	5.38984	3.59114	7.38218
South China	13SZ19@26	819.453	11.563	0.00114171	1251.31	5.62725	1.27007	4.1099	0.308613	0.284875	0.198949	0.373209	10.3712	7.24293	13.5871
South China	13SZ19@28	801.758	13.0551	0.00111122	1286.46	4.65227	1.2653	5.92938	0.424835	0.311359	0.218838	0.405449	11.3353	7.96701	14.7608
South China	13SZ19@29	838.672	11.8131	0.0018268	1516.57	0.706308	1.26291	5.64867	0.394394	0.0386553	0.0233856	0.0580012	1.40728	0.851375	2.11159
South China	13SZ19@30	2411.58	38.3544	0.000575399	3013.51	-3.73517	2.10815	7.36635	0.306823	1.48488	1.16766	1.73892	54.0587	42.5098	63.307
South China	13SZ19@31	797.809	11.7889	0.000960376	1201.84	6.25319	1.25011	7.61024	0.198249	0.483336	0.350621	0.610872	17.5963	12.7647	22.2394
South China	13SZ19@32	835.684	11.8022	0.00127385	1275.65	5.40856	1.27139	4.06534	0.347681	0.193795	0.131645	0.260619	7.0553	4.79266	9.48811
South China	13SZ19@33	768.622	10.907	0.00125127	1735.15	-4.73412	1.23798	6.34637	0.413651	0.206978	0.141267	0.277106	7.53524	5.14295	10.0883
South China	13SZ19@34	801.531	11.4003	0.00133918	1395.84	2.49441	1.28455	6.02556	0.366284	0.160185	0.107334	0.218225	5.83168	3.90759	7.9447
South China	13SZ19@37	2011.09	53.5435	0.000410881	3074.96	-11.5685	2.70312	7.18266	0.39179	2.39883	1.95252	2.71916	87.3318	71.0834	98.9937
South China	13SZ19@39	764.023	10.8246	0.00296744	1941.16	-8.90269	1.26859	3.80116	0.218101	0.00138988	0.00066208	0.00261407	0.0505998	0.0241037	0.0951679
South China	12SZ14@01	732.705	10.3976	0.00136843	1467.64	-0.0211814	1.28373	4.46564	0.463855	0.147093	0.0979592	0.201554	5.35506	3.5663	7.33777
South China	12SZ14@02	727.372	10.3268	0.00171988	1559.59	-1.92191	1.26736	6.0575	0.337657	0.0527951	0.0326636	0.0775575	1.92206	1.18915	2.82356
South China	12SZ14@04	745.97	10.5988	0.00137514	1782.42	-6.03218	1.3066	2.42145	0.327971	0.14424	0.0959243	0.197908	5.25121	3.49222	7.20504
South China	12SZ14@05	739.477	10.556	0.0012785	2372.55	-17.8777	1.28543	6.05451	0.238753	0.191185	0.129745	0.257347	6.96028	4.72351	9.36896
South China	12SZ14@06	736.619	10.4517	0.00173899	1567.07	-1.92218	1.30717	2.44174	0.131177	0.0499337	0.0307697	0.0736322	1.81789	1.1202	2.68066
South China	12SZ14@07	734.458	10.5831	0.00102821	1705.22	-4.68564	1.27533	7.25722	0.33959	0.396607	0.283646	0.508038	14.4389	10.3264	18.4956
South China	12SZ14@08	741.164	10.5109	0.00200714	1688.92	-4.25965	1.29749	4.24904	0.215585	0.0228496	0.0133109	0.0355319	0.831863	0.484596	1.29357
South China	12SZ14@09	759.628	10.7578	0.00122512	1970.66	-9.54889	1.28452	4.24056	0.184705	0.22338	0.153299	0.297521	8.13238	5.58102	10.8315
South China	12SZ14@10	757.121	10.7643	0.00223772	1848.6	-7.17047	1.32365	5.11529	0.24933	0.0116661	0.00647546	0.0189889	0.424717	0.235746	0.69131
South China	12SZ14@11	769.561	10.9109	0.00122751	1840.1	-6.79889	1.32865	4.66546	0.179941	0.221828	0.152158	0.295594	8.07588	5.53947	10.7614
South China	12SZ14@12	770.093	10.8974	0.00177729	1884.45	-7.67295	1.31551	3.30599	0.162455	0.0446587	0.0272993	0.0663552	1.62585	0.993859	2.41573
South China	12SZ14@13	753.915	10.7091	0.00483311	2182.36	-13.8842	1.48701	4.14531	0.241717	6.03566e-06	1.94479e-06	1.64265e-05	0.000219734	7.0802e-05	0.000598023
South China	12SZ14@14	731.091	10.3833	0.0014052	1585.71	-2.37763	1.28903	4.49191	0.174459	0.132139	0.0873253	0.182388	4.81067	3.17917	6.64
South China	12SZ14@15	715.534	10.1697	0.00258629	1559.93	-2.11997	1.33338	5.12327	0.174203	0.00422249	0.00217866	0.00736419	0.153724	0.0793163	0.268101
South China	12SZ14@16	743.011	10.5359	0.0020663	1903.6	-8.48615	1.35481	5.21603	0.135019	0.0192296	0.0110641	0.0302551	0.700073	0.402798	1.10147
South China	12SZ14@17	738.478	10.5687	0.00205939	1555.85	-1.67177	1.27411	3.8411	0.255393	0.0196209	0.0113056	0.0308285	0.714319	0.41159	1.12234
South China	12SZ14@18	758.817	10.7469	0.00089366	1835.34	-6.87428	1.35419	6.33412	0.185671	0.587114	0.4319	0.732292	21.3745	15.7237	26.6598
South China	12SZ14@19	774.482	11.0248	0.00186302	1667.26	-3.2989	1.31617	4.88289	0.253957	0.0347817	0.0208831	0.0525647	1.26626	0.760268	1.91367
South China	12SZ14@20	739.694	10.5042	0.00200046	1877.7	-8.02443	1.28424	5.63893	0.271439	0.0232986	0.0135914	0.0361822	0.848209	0.49481	1.31725
South China	12SZ14@22	740.053	10.5059	0.000814137	1850.88	-7.48085	1.25877	5.24196	0.223618	0.740307	0.553744	0.908936	26.9516	20.1596	33.0907
South China	12SZ14@25	742.037	10.5226	0.00218972	1792.8	-6.30413	1.30469	4.648	0.228699	0.0134181	0.00752319	0.0216339	0.488499	0.273889	0.787605
South China	12SZ17@01	740.37	10.5181	0.00163491	1384.25	1.74436	1.26523	5.03524	0.146415	0.0676367	0.0425976	0.097702	2.46238	1.55081	3.55694
South China	12SZ17@02	721.744	10.3252	0.00273061	1352.54	2.06947	1.29432	4.62	0.346076	0.00277233	0.00138782	0.00497526	0.10093	0.050525	0.181129
South China	12SZ17@03	728.164	10.3369	0.00232891	1011.88	8.86366	1.27905	4.17128	0.344111	0.00894244	0.00486968	0.0148209	0.325559	0.177286	0.539568
South China	12SZ17@04	719.751	10.2324	0.00283908	1269.4	3.67359	1.25761	4.7618	0.347537	0.0020207	0.000988822	0.00370512	0.0735656	0.035999	0.134888
South China	12SZ17@05	714.557	10.1954	0.00237323	1281.22	3.35876	1.27379	4.67401	0.168821	0.00785854	0.00423987	0.0131393	0.286098	0.154357	0.478349
South China	12SZ17@06	740.74	10.5972	0.00222169	1111.72	7.10767	1.30313	3.55334	0.254791	0.012224	0.00680792	0.0198339	0.445026	0.247849	0.722072
South China	12SZ17@07	719.476	10.2463	0.00205044	1036.43	8.2436	1.31526	3.93068	0.252343	0.0201394	0.0116261	0.0315871	0.733194	0.423258	1.14996
South China	12SZ17@08	727.376	10.3266	0.00216554	985.843	9.36112	1.41117	4.896	0.22705	0.0143983	0.0081138	0.0231035	0.524186	0.295391	0.841105
South China	12SZ17@09	725.134	10.3459	0.00232919	1107.33	6.94381	1.28706	3.7191	0.352896	0.00893525	0.00486548	0.0148098	0.325297	0.177133	0.539164
South China	12SZ17@10	732.887	10.4255	0.00243597	1112.84	6.95982	1.30047	3.81184	0.210553	0.00654494	0.00348503	0.0110798	0.238275	0.126876	0.403371
South China	12SZ17@11	706.366	10.0604	0.002321	1063.17	7.50952	1.25912	3.47017	0.297834	0.0091511	0.00499158	0.0151429	0.333155	0.181723	0.551294
South China	12SZ17@12	728.513	10.3526	0.00226234	1517.99	-1.08362	1.36686	6.178	0.218786	0.0108581	0.00599592	0.01776	0.395299	0.218288	0.646572
South China	12SZ17@13	721.973	10.2533	0.00198294	1034.36	8.32427	1.36158	3.92957	0.29102	0.0245197	0.0143564	0.0379466	0.892665	0.522659	1.38149
South China	12SZ17@14	722.27	10.2632	0.00190152	1062.54	7.77657	1.26383	4.15858	0.159192	0.0310887	0.0185158	0.0473431	1.13181	0.674085	1.72357
South China	12SZ17@15	739.743	10.5201	0.00385582	1054.11	8.22101	1.30937	3.9402	0.200873	0.000104266	4.12314e-05	0.000233829	0.00379589	0.00150107	0.00851277
South China	12SZ17@16	747.641	10.6629	0.00357835	957.931	10.2322	1.37647	4.13809	0.29147	0.00023413	9.81285e-05	0.00049699	0.00852374	0.00357247	0.0180934
South China	12SZ17@17	729.357	10.3525	0.0017806	1100.49	7.146	1.29105	4.08409	0.218328	0.0442296	0.0270182	0.0657606	1.61022	0.983625	2.39408
South China	12SZ17@19	739.748	10.5275	0.00188324	1323.32	2.93371	1.2794	4.90873	0.236902	0.0327908	0.0196045	0.0497547	1.19378	0.71372	1.81137
South China	12SZ17@20	732.785	10.4281	0.00242295	986.551	9.43386	1.29963	3.81262	0.340828	0.0067982	0.00362978	0.0114789	0.247495	0.132146	0.4179
South China	12SZ17@21	738.769	10.5058	0.00540466	1023.13	8.81218	1.41239	3.78267	0.289253	1.14038e-06	3.25974e-07	3.47562e-06	4.15166e-05	1.18674e-05	0.000126533
South China	12SZ17@22	720.738	10.2375	0.00247825	1016.55	8.65315	1.30735	3.90975	0.308073	0.00578581	0.00305364	0.00987706	0.210638	0.111171	0.359584
South China	12SZ17@23	718.881	10.215	0.00121747	1148.85	6.02972	1.25664	3.97593	0.209911	0.228413	0.157005	0.303764	8.31562	5.71592	11.0588
South China	12SZ17@24	722.414	10.2598	0.00127484	1301.72	3.08242	1.30254	5.79071	0.298932	0.193235	0.131237	0.259918	7.03492	4.77783	9.46257
South China	12SZ17@25	701.687	10.1296	0.00230203	1011.07	8.45557	1.30323	4.3976	0.239173	0.0096714	0.00529639	0.0159439	0.352097	0.19282	0.580454
South China	12SZ17@26	728.456	10.3537	0.00185124	1214.91	4.88525	1.30929	2.30451	0.299159	0.0359967	0.0216659	0.0542741	1.3105	0.78877	1.9759
South China	12SZ17@27	743.078	10.8006	0.00108971	1747.06	-5.37669	1.27259	3.58907	0.239681	0.331508	0.234052	0.429852	12.0689	8.5209	15.6492
South China	12SZ17@28	830.955	11.7562	0.00187005	1135.6	8.08561	1.29837	8.28719	0.290965	0.0340766	0.0204296	0.0515708	1.24059	0.743761	1.87749
South China	12SZ10@01	752.434	10.6619	0.00201978	1830.69	-6.90741	1.41863	3.06902	0.239975	0.0220224	0.012795	0.0343314	0.801748	0.465816	1.24987
South China	12SZ10@02	746.774	11.0637	0.00254252	1750.89	-5.41573	1.57914	3.76243	0.297949	0.0047973	0.00249805	0.00829446	0.174651	0.0909442	0.301968
South China	12SZ10@03	762.522	10.7964	0.00101774	1662.98	-3.41908	1.31356	2.29992	0.393314	0.408895	0.293076	0.522693	14.8862	10.6697	19.0292
South China	12SZ10@04	730.435	10.477	0.00189089	2158.35	-13.7774	1.35972	4.32853	0.273489	0.0320676	0.0191414	0.0487311	1.16745	0.696861	1.77411
South China	12SZ10@05	736.676	10.5602	0.00160328	1988.78	-10.2988	1.32262	5.96061	0.372488	0.0741687	0.047022	0.106469	2.70019	1.71188	3.8761
South China	12SZ10@07	748.788	10.6298	0.00174617	1862.24	-7.59109	1.33571	2.15846	0.231137	0.0488988	0.0300867	0.0722089	1.78021	1.09534	2.62884
South China	12SZ10@08	738.379	10.4994	0.00157915	2094.14	-12.3694	1.31763	5.15979	0.246325	0.0795749	0.0507052	0.113685	2.897	1.84597	4.1388
South China	12SZ10@09	733.502	10.5438	0.0015373	1738.99	-5.38923	1.28249	5.53532	0.337586	0.0899024	0.0577906	0.127379	3.27299	2.10392	4.63735
South China	12SZ10@10	725.006	10.3148	0.000944699	1964.32	-9.99553	1.27689	4.86027	0.374525	0.50594	0.368226	0.637457	18.4192	13.4056	23.2073
South China	12SZ10@11	732.988	10.4012	0.00333537	2026.49	-11.1163	1.40528	6.93961	0.387012	0.000475467	0.000209687	0.000961855	0.0173098	0.00763387	0.0350173
South China	12SZ10@13	763.399	10.8143	0.00256207	2268.39	-15.4547	1.33469	1.31301	0.376021	0.00453145	0.00234997	0.0078652	0.164972	0.085553	0.286341
South China	12SZ10@14	736.459	10.4477	0.00162023	1842.16	-7.38875	1.29919	6.1939	0.364978	0.0705938	0.044597	0.101678	2.57004	1.6236	3.70168
South China	12SZ10@16	731.438	10.4046	0.00139783	2077.27	-12.1428	1.26513	5.69288	0.393161	0.135006	0.0893577	0.186073	4.91504	3.25316	6.77418
South China	12SZ10@17	720.149	10.279	0.00159404	1855.75	-7.91832	1.27365	4.399	0.341293	0.0761955	0.0484007	0.109178	2.77397	1.76208	3.97474
South China	12SZ10@18	765.122	10.8479	0.00160911	1723.99	-4.58733	1.36351	4.10908	0.350333	0.0729194	0.0461736	0.104796	2.6547	1.68099	3.81521
South China	12SZ10@20	727.732	10.3307	0.00395261	1458	0.07384	1.72421	5.48807	0.181778	7.863e-05	3.04696e-05	0.000179751	0.0028626	0.00110928	0.006544
South China	12SZ10@22	748.622	10.6297	0.00228382	2171.2	-13.7467	1.47687	4.48356	0.232194	0.010199	0.00560666	0.0167531	0.371303	0.204116	0.609912
South China	12SZ10@23	740.17	10.5987	0.00170978	1544.97	-1.44279	1.28726	3.85338	0.276735	0.054372	0.0337104	0.0797146	1.97947	1.22726	2.90209
South China	12SZ10@24	731.447	10.8719	0.00177209	2186.34	-14.319	1.43306	4.66239	0.415444	0.0453408	0.0277465	0.0672993	1.65068	1.01014	2.4501
South China	12SZ10@25	777.081	11.0759	0.0032013	1729.26	-4.50421	1.40805	2.84169	0.347925	0.000702864	0.000318804	0.00138461	0.0255885	0.0116064	0.0504082
South China	12SZ10@26	732.382	10.3932	0.00176941	1749.17	-5.60939	1.29955	2.87003	0.38855	0.0456966	0.0279799	0.0677914	1.66363	1.01864	2.46801
South China	12SZ10@27	757.294	10.8535	0.001085	1691.28	-4.06321	1.31559	5.2926	0.401424	0.336093	0.237524	0.435391	12.2358	8.64728	15.8508
South China	12SZ10@28	749.826	10.6276	0.00241085	1848.96	-7.31304	1.44642	4.2536	0.328191	0.00704225	0.00376964	0.0118625	0.25638	0.137237	0.431867
South China	13SZ17@01	735.759	10.4562	0.00499632	1771.02	-5.98572	1.35194	6.09125	0.30352	3.75038e-06	1.16781e-06	1.05423e-05	0.000136537	4.25152e-05	0.000383803
South China	13SZ17@02	730.426	10.3673	0.00149995	1795.43	-6.53804	1.31542	2.44712	0.355472	0.100245	0.0649452	0.140986	3.64951	2.36439	5.13272
South China	13SZ17@03	730.024	10.3705	0.00181307	1846.36	-7.55563	1.32293	2.47202	0.340073	0.0402349	0.0244114	0.0602073	1.46479	0.888721	2.19191
South China	13SZ17@04	715.387	10.3019	0.00156002	1785.27	-6.57644	1.30936	2.27622	0.253933	0.0841397	0.0538293	0.119751	3.06319	1.95971	4.35967
South China	13SZ17@05	718.218	10.299	0.00163221	1820.8	-7.23596	1.34198	3.35213	0.254123	0.0681709	0.0429583	0.0984211	2.48183	1.56394	3.58312
South China	13SZ17@07	732.916	10.4013	0.00157344	1738.74	-5.37579	1.32899	2.56767	0.397147	0.0809107	0.0516181	0.115462	2.94563	1.87921	4.20352
South China	13SZ17@09	729.841	10.3894	0.00341986	1529.17	-1.28628	1.29632	2.5337	0.244168	0.000371651	0.000161026	0.000764526	0.0135303	0.00586233	0.0278333
South China	13SZ17@10	723.682	10.3602	0.00209053	1684.86	-4.45828	1.31072	3.56859	0.404475	0.0179179	0.0102571	0.0283269	0.652319	0.373421	1.03127
South China	13SZ17@11	740.51	10.5106	0.00129508	1772.3	-5.91828	1.35665	8.56905	0.313051	0.182165	0.123195	0.246011	6.63188	4.48504	8.95627
South China	13SZ17@12	739.032	10.483	0.00208162	1645.11	-3.42717	1.41013	3.33467	0.3458	0.0183893	0.0105466	0.0290209	0.669479	0.38396	1.05653
South China	13SZ17@13	738.112	10.6344	0.00240335	1807.32	-6.65552	1.43244	3.87577	0.29729	0.00719796	0.00385904	0.0121068	0.262049	0.140492	0.44076
South China	13SZ17@14	723.783	10.2942	0.00131326	1740.3	-5.55107	1.38702	3.37889	0.246967	0.172756	0.116388	0.234147	6.28937	4.23722	8.52436
South China	13SZ17@15	721.585	10.2959	0.0018315	1758.71	-5.9529	1.58288	2.70504	0.39924	0.0381296	0.0230448	0.0572656	1.38814	0.83897	2.08481
South China	13SZ17@16	792.869	11.2011	0.00214738	1197.21	6.26408	1.38324	6.21298	0.379049	0.0151813	0.00858765	0.0242723	0.552691	0.312642	0.883659
South China	13SZ17@17	737.881	10.4738	0.00222211	1781.28	-6.14209	1.32719	3.64779	0.283133	0.0122093	0.00679914	0.0198116	0.444491	0.24753	0.721262
South China	13SZ17@18	718.696	10.2094	0.00192095	1833.72	-7.48579	1.34689	2.55187	0.228716	0.0293765	0.0174249	0.0449083	1.06948	0.634372	1.63493
South China	13SZ17@19	731.348	10.402	0.00147385	1714.26	-4.91571	1.33853	2.58248	0.297137	0.10817	0.0704638	0.151347	3.93803	2.56531	5.50994
South China	13SZ17@20	799.101	11.4781	0.00131974	1199.18	6.32583	1.29283	6.65585	0.433265	0.169524	0.114056	0.230062	6.1717	4.15231	8.37562
South China	13SZ17@21	746.225	10.7243	0.00269695	1717.35	-4.7445	1.49977	4.07461	0.192243	0.00305819	0.00154176	0.00545179	0.111336	0.0561292	0.198478
South China	13SZ17@22	730.817	10.3794	0.00196748	1761.58	-5.8632	1.37957	4.2051	0.316625	0.0256502	0.015067	0.0395748	0.93382	0.548529	1.44076
South China	13SZ17@24	737.711	10.5606	0.00117043	1831	-7.12567	1.30377	4.68749	0.431134	0.261994	0.181871	0.345191	9.53814	6.6212	12.567
South China	13SZ17@25	720.977	10.2446	0.00206683	1668.08	-4.16942	1.479	3.74092	0.321371	0.0191999	0.0110457	0.0302115	0.69899	0.40213	1.09988
South China	13SZ17@26	708.589	10.0804	0.00159001	1735.72	-5.70355	1.33775	2.50923	0.357764	0.0770946	0.0490131	0.110378	2.80671	1.78437	4.01843
South China	Y0407@1	777.8	26.2	0.001062	1244	6.9		6.75	0.23	0.359398	0.255221	0.463466	13.0843	9.29158	16.873
South China	Y0407@2	727.3	19.9	0.001586	1147	7.8		5.13	0.13	0.078002	0.0496317	0.111589	2.83974	1.80689	4.0625
South China	Y0407@3	734.2	20.9	0.001446	1120	8.3		5.51	0.21	0.117319	0.0768711	0.163246	4.27112	2.79857	5.94312
South China	Y0407@4	713.2	35.5	0.000865	1210	6.6		6.51	0.3	0.638279	0.472367	0.791603	23.2372	17.197	28.8191
South China	Y0407@5	699.5	43.5	0.001091	967	10.3		5.64	0.4	0.330261	0.233109	0.428345	12.0235	8.48656	15.5943
South China	Y0407@6	712.7	25.8	0.001602	1090	8.5		6.18	0.22	0.074447	0.0472112	0.106841	2.71032	1.71877	3.88966
South China	Y0407@7	728.5	37.2	0.001356	962	10.7		6.39	0.26	0.152519	0.101838	0.208475	5.5526	3.7075	7.58975
South China	Y0407@8	802.8	24.4	0.00139	877	13		6.19	0.48	0.138126	0.0915724	0.190077	5.0286	3.33379	6.91994
South China	Y0407@9	694	110.4	0.002735	1070	8.6		5.85	0.24	0.00273705	0.0013689	0.00491621	0.099645	0.0498361	0.17898
South China	Y0407@10	628.2	95.6	0.001224	959	9.5		5.6	0.19	0.224108	0.153835	0.298424	8.15888	5.60052	10.8644
South China	Y0407@11	707.3	29.3	0.002339	988	10		5.43	0.23	0.00868328	0.00471857	0.0144201	0.316124	0.171784	0.524979
South China	Y0407@12	737.5	20.5	0.00153	1052	9.4		6.27	0.23	0.0918356	0.0591236	0.12993	3.34337	2.15245	4.73022
South China	Y0407@13	749.1	23.2	0.001286	1002	10.4		5.56	0.22	0.187049	0.126739	0.252153	6.8097	4.61406	9.1799
South China	Y0407@14	737.8	49.9	0.00141	870	12.3		6.28	0.18	0.130302	0.0860243	0.180022	4.74377	3.1318	6.5539
South China	Y0407@15	739.7	12.8	0.002119	1190	7.3		5.68	0.18	0.0164907	0.00938399	0.0262181	0.600362	0.341634	0.954497
South China	Y0407@16	751.5	34.9	0.001326	905	11.9		5.85	0.17	0.16646	0.111847	0.226183	6.06013	4.0719	8.2344
South China	Y0407@17	756.7	14	0.001235	1091	9		6.18	0.14	0.217035	0.148637	0.289636	7.90138	5.41127	10.5445
South China	Y0407@18	748.5	27.5	0.001291	1009	10.2		5.84	0.19	0.184342	0.124774	0.248751	6.71116	4.54253	9.05602
South China	Y0407@19	758.7	14.4	0.002047	1060	9.6		5.7	0.21	0.0203425	0.0117518	0.031884	0.740588	0.427836	1.16077
South China	Y0407@20	761.7	37.5	0.001651	1046	9.8		6.68	0.48	0.0645365	0.0405082	0.0935214	2.34951	1.47474	3.40474
South China	Y408@01	817.5	74.7	0.001619	1034	10.7		4.71	0.14	0.0708472	0.0447685	0.102018	2.57926	1.62984	3.71406
South China	Y408@02	722.7	40.9	0.001539	1116	8.2		5.21	0.19	0.0894573	0.0574839	0.126791	3.25678	2.09276	4.61594
South China	Y408@03	743.1	24.9	0.001134	1067	9.2		5.34	0.19	0.291348	0.203798	0.381107	10.6068	7.41948	13.8746
South China	Y408@04	751.5	14.9	0.001871	1232	6.7		5.52	0.19	0.033982	0.0203688	0.0514373	1.23715	0.741547	1.87263
South China	Y408@05	713.1	33.2	0.001263	1059	9		5.3	0.17	0.200022	0.136184	0.268416	7.28199	4.95791	9.77195
South China	Y408@06	641.9	79.4	0.002364	1316	4.1		4.78	0.22	0.0080729	0.00436396	0.013473	0.293902	0.158874	0.490499
South China	Y408@07	721.8	48.2	0.001478	1116	8.2		5.35	0.19	0.106869	0.0695559	0.14965	3.89067	2.53225	5.44816
South China	Y408@08	703.3	26.5	0.001945	1183	6.9		4.74	0.15	0.0273875	0.0161635	0.0420676	0.99707	0.588448	1.53151
South China	Y408@09	694.7	28.6	0.002459	1129	7.7		3.44	0.13	0.0061199	0.00324302	0.0104076	0.222801	0.118065	0.3789
South China	Y408@10	708	57.3	0.001263	998	9.9		5.43	0.16	0.200022	0.136184	0.268416	7.28199	4.95791	9.77195
South China	Y408@11	860.3	37.2	0.001399	1256	7.7		6.66	0.18	0.134548	0.0890328	0.185485	4.89837	3.24133	6.75276
South China	Y408@12	717.9	13.5	0.002141	1149	7.6		3.54	0.2	0.0154662	0.00876052	0.0246967	0.563064	0.318935	0.899107
South China	Y408@13	758.5	25.8	0.001398	1064	9.5		5.39	0.19	0.134941	0.0893115	0.185989	4.91267	3.25147	6.77113
South China	Y408@14	730	30.8	0.002805	1008	10		5.39	0.17	0.00223178	0.00109994	0.00406462	0.0812501	0.0400444	0.147977
South China	Y408@15	470.2	16.6	0.002444	1248	3.1		5.8	0.21	0.00639347	0.00339866	0.0108406	0.232761	0.123731	0.394663
South China	Y408@16	729.1	23.2	0.001118	1165	7.5		6.67	0.23	0.305261	0.214247	0.398043	11.1133	7.79988	14.4911
South China	Y408@17	813	73.3	0.000842	990	11.3		6.25	0.19	0.682547	0.507568	0.842657	24.8488	18.4785	30.6778
South China	Y408@18	769.8	14	0.001337	1045	9.9		6.18	0.59	0.161206	0.108067	0.219522	5.86886	3.9343	7.99191
South China	Y408@19	768	26.2	0.001819	1064	9.6		6.21	0.51	0.0395448	0.0239629	0.0592442	1.43967	0.872392	2.15685
South China	Y408@20	765.4	15.7	0.001993	998	10.6		2.93	1.49	0.023811	0.013912	0.0369233	0.866862	0.506482	1.34423
South China	Y0412@1	730.7	20	0.00278	1596	1.5		5.13	0.14	0.00240052	0.00118932	0.00435035	0.0873933	0.0432983	0.158379
South China	Y0412@2	671	42.8	0.00315	1736	-1.7		6.88	0.17	0.000816252	0.000374236	0.00159173	0.0297165	0.0136244	0.0579485
South China	Y0412@3	797.7	16.6	0.002289	1629	1.1		7.21	0.19	0.010046	0.00551656	0.0165187	0.365734	0.200836	0.601381
South China	Y0412@4	812.8	14.9	0.001894	1604	1.7		6.9	0.19	0.031778	0.0189562	0.0483209	1.15691	0.690119	1.75917
South China	Y0412@5	747.9	23.7	0.001536	1542	2.6		6.65	0.24	0.0902431	0.0580254	0.127829	3.28539	2.11247	4.65373
South China	Y0412@6	525	33.2	0.001846	1571	2		5.16	0.88	0.0365513	0.0220239	0.0550531	1.33069	0.801804	2.00426
South China	Y0412@7	795.6	19.4	0.002543	1410	4.6		6.88	0.23	0.00479056	0.00249429	0.00828359	0.174405	0.0908072	0.301573
South China	Y0412@8	809.5	20.4	0.001546	1498	3		6.36	0.23	0.0876501	0.0562401	0.124402	3.19099	2.04748	4.52897
South China	Y0412@9	779.7	37	0.001905	1517	2.9		6.6	0.29	0.0307751	0.0183156	0.0468979	1.1204	0.666799	1.70736
South China	Y0412@10	802	15.4	0.002403	1396	5		6.68	0.21	0.00720526	0.00386324	0.0121182	0.262315	0.140645	0.441177
South China	Y0412@11	785.9	24	0.001165	1563	2.1		6.29	0.19	0.266171	0.184981	0.350318	9.69023	6.73443	12.7537
South China	Y0412@12	801.6	20.5	0.001296	1433	4.5		6.64	0.17	0.181674	0.12284	0.245394	6.61404	4.4721	8.9338
South China	Y0412@13	784.4	23.2	0.002391	1383	5.1		6.66	0.14	0.0074618	0.00401086	0.0125199	0.271654	0.146019	0.4558
South China	Y0412@14	811.9	15.1	0.003327	1386	5.1		6.98	0.23	0.000487207	0.000215241	0.000983972	0.0177372	0.00783608	0.0358225
South China	Y0412@15	814.7	12.1	0.002232	1460	3.9		7.17	0.26	0.0118622	0.00659215	0.0192861	0.431854	0.239994	0.702131
South China	Y0412@16	807.9	13.8	0.001436	1439	4.2		6.89	0.24	0.12079	0.0793113	0.167742	4.39748	2.88741	6.10683
South China	Y0412@17	796.6	15.9	0.001584	1474	4		6.83	0.18	0.0784582	0.0499429	0.112197	2.85635	1.81822	4.08464
South China	Y0412@18	799.1	20.1	0.001297	1530	2.7		6.71	0.17	0.181145	0.122456	0.244728	6.59478	4.45815	8.90956
South China	Y0412@19	778.4	14.6	0.002788	1382	5		6.7	0.48	0.00234518	0.00115995	0.00425679	0.0853786	0.0422293	0.154973
South China	Y0412@20	785.5	14.8	0.001834	1506	3.5		6.24	0.43	0.0378527	0.0228655	0.0568779	1.37807	0.832442	2.0707
South China	Y0414@1	825.2	28.1	0.001362	1642	0.7		6.37	0.28	0.149874	0.099946	0.205104	5.45632	3.63863	7.46701
South China	Y0414@2	800.8	20.5	0.002163	1576	2.3		6.92	0.26	0.0145054	0.00817847	0.0232635	0.528083	0.297745	0.846931
South China	Y0414@3	502.3	59.7	0.001831	1752	-3.1		6.6	0.08	0.0381852	0.0230809	0.0573435	1.39017	0.840283	2.08765
South China	Y0414@4	806.1	13.6	0.001887	1562	2		6.53	0.15	0.0324332	0.0193754	0.0492488	1.18076	0.705382	1.79295
South China	Y0414@5	796.8	16.1	0.002586	1767	-1		6.17	0.12	0.00422611	0.00218067	0.00737008	0.153856	0.0793893	0.268315
South China	Y0414@6	766.3	26	0.0015	1560	2.3		6.64	0.13	0.10023	0.0649346	0.140966	3.64896	2.36401	5.13199
South China	Y0414@7	803.5	19.5	0.001148	1643	0.8		7.01	0.29	0.279696	0.195074	0.366881	10.1826	7.10187	13.3567
South China	Y0414@8	806.3	12.8	0.003299	1550	2.5		5.65	0.33	0.000528647	0.000234924	0.00106176	0.0192459	0.00855263	0.0386545
South China	Y0414@9	799.1	48.4	0.002511	1523	2.7		7.38	0.26	0.00525901	0.00275662	0.00903615	0.191459	0.100358	0.32897
South China	Y0414@10	691.6	18.7	0.001692	1603	2.3		6.74	0.13	0.0572654	0.0356369	0.0836613	2.0848	1.2974	3.04577
South China	Y0414@11	802.6	22	0.001028	1558	2.1		7.2	0.2	0.396849	0.283831	0.508327	14.4477	10.3332	18.5062
South China	Y0414@12	818.2	15.3	0.001667	1382	5.2		6.58	0.28	0.0615952	0.0385326	0.0895424	2.24243	1.40282	3.25988
South China	Y0414@13	741.8	28.3	0.002156	1450	4.2		7	0.25	0.0148044	0.00835935	0.0237103	0.538971	0.30433	0.863195
South China	Y0414@14	790.4	15.7	0.00236	1647	0.8		5.32	0.19	0.0081676	0.00441885	0.0136203	0.29735	0.160873	0.49586
South China	Y0414@15	806.8	18.9	0.001619	1564	2.1		6.76	0.48	0.0708472	0.0447685	0.102018	2.57926	1.62984	3.71406
South China	Y0414@16	744	22.6	0.001631	1556	1.8		7.13	0.13	0.0684114	0.0431208	0.0987447	2.49059	1.56986	3.5949
South China	Y0414@17	723.8	26.2	0.002373	1403	5.1		7.09	0.22	0.00786383	0.00424294	0.0131475	0.286291	0.154468	0.478649
South China	Y0414@18	811	20.2	0.001856	1402	4.9		7.06	0.24	0.0355011	0.0213463	0.0535773	1.29245	0.777135	1.95053
South China	NX-12-1	803	6.5	0.002733	970	11.53	0.5	3.49	0.31	0.00275306	0.00137748	0.004943	0.100228	0.0501485	0.179955
South China	NX-12-2	807	6.6	0.002875	960	11.75	0.6	3.72	0.31	0.00181978	0.000883826	0.00336054	0.066251	0.0321766	0.122344
South China	NX-12-4	784	9.5	0.002693	990	11.09	0.6	3.61	0.37	0.00309358	0.00156089	0.00551057	0.112625	0.0568257	0.200618
South China	NX-12-5	795	8.2	0.002158	1030	10.52	0.5	3.6	0.32	0.0147184	0.00830726	0.0235817	0.535837	0.302434	0.858517
South China	NX-12-6	798	8.4	0.003113	1000	11.11	0.6	3.78	0.22	0.000909227	0.000420107	0.00176009	0.0331013	0.0152944	0.0640778
South China	NX-12-7	797	9.6	0.002697	970	11.52	0.5	3.29	0.19	0.00305771	0.0015415	0.005451	0.111319	0.0561198	0.198449
South China	NX-12-8	799	9.4	0.002561	1010	11	0.5	3.61	0.2	0.00454564	0.00235786	0.00788817	0.165489	0.0858403	0.287177
South China	NX-12-9	797	10.6	0.003159	960	11.64	0.6	3.52	0.25	0.000795113	0.000363857	0.00155327	0.0289469	0.0132466	0.0565484
South China	NX-12-10	790	7.3	0.002903	950	11.79	0.5	3.61	0.32	0.00167713	0.000809778	0.00311434	0.0610576	0.0294808	0.113381
South China	NX-12-11	808	6.8	0.002503	1010	11.02	0.5	3.97	0.2	0.00538311	0.0028264	0.00923474	0.195977	0.102898	0.3362
South China	NX-12-12	808	7.4	0.002573	1050	10.38	0.5	4.34	0.39	0.00438936	0.00227108	0.00763509	0.159799	0.0826809	0.277963
South China	NX-12-13	801	6.7	0.001692	1000	11.1	0.5	3.8	0.32	0.0572654	0.0356369	0.0836613	2.0848	1.2974	3.04577
South China	NX-12-17	804	8.9	0.003166	1010	10.95	0.6	3.87	0.28	0.000779051	0.000355984	0.00152401	0.0283621	0.01296	0.055483
South China	NX-12-18	803	6.1	0.002304	1080	9.89	0.5	3.59	0.22	0.00961612	0.00526394	0.0158589	0.350084	0.191639	0.577361
South China	NX-12-19	809	6.4	0.002588	1040	10.52	0.6	3.88	0.17	0.00420154	0.00216708	0.00733014	0.152961	0.0788947	0.266861
South China	NX-12-20	812	6.2	0.002357	1100	9.72	0.6	3.47	0.25	0.00823935	0.00446048	0.0137318	0.299962	0.162388	0.499919
South China	NX-12-22	810	8.5	0.002537	960	11.87	0.4	4.27	0.18	0.0048751	0.0025415	0.00841976	0.177483	0.0925259	0.30653
South China	NX-12-23	822	8.4	0.003185	1040	10.75	0.5	3.56	0.26	0.00073707	0.000335463	0.00144732	0.0268338	0.0122129	0.052691
South China	NX-12-24	816	8.3	0.002655	1030	10.82	0.5	3.47	0.3	0.00345602	0.0017577	0.00611001	0.12582	0.0639908	0.222441
South China	NX-12-14	907	8.8	0.003054	950	13.13	0.5	3.35	0.28	0.00107988	0.000505165	0.00206616	0.0393142	0.018391	0.0752205
South China	NX-12-21	862	6.4	0.003498	1020	11.46	0.6	3.64	0.25	0.000295937	0.000126139	0.000618269	0.0107739	0.00459222	0.0225087
South China	NX-12-25	873	8	0.001921	950	12.77	0.4	4.76	0.36	0.0293725	0.0174224	0.0449025	1.06933	0.634279	1.63472
South China	NX-13-1	796	6.4	0.00574	890	12.68	0.7	4.75	0.34	4.29001e-07	1.14307e-07	1.39729e-06	1.56182e-05	4.16147e-06	5.08696e-05
South China	NX-13-2	807	6.9	0.002507	1040	10.53	0.6	3.89	0.24	0.00532069	0.00279129	0.00913491	0.193705	0.10162	0.332565
South China	NX-13-3	799	6.8	0.002207	950	11.84	0.6	3.91	0.32	0.012759	0.00712782	0.0206418	0.464505	0.259495	0.751487
South China	NX-13-4	810	7	0.001949	1000	11.28	0.6	4.42	0.27	0.02707	0.0159627	0.0416128	0.98551	0.581138	1.51496
South China	NX-13-5	802	6.2	0.002027	1050	10.35	0.5	4.8	0.45	0.0215639	0.0125097	0.0336647	0.785055	0.455429	1.2256
South China	NX-13-6	805	6.5	0.002784	980	11.48	0.6	3.94	0.44	0.00237269	0.00117454	0.00430332	0.0863801	0.0427605	0.156666
South China	NX-13-7	815	7.2	0.001758	1070	10.19	0.5	4.01	0.25	0.0472417	0.0289952	0.0699254	1.71988	1.0556	2.5457
South China	NX-13-8	796	6.1	0.002325	1050	10.29	0.5	3.8	0.36	0.00904503	0.00492959	0.0149793	0.329294	0.179467	0.545336
South China	NX-13-9	809	6.2	0.002729	990	11.33	0.6	3.41	0.36	0.00278535	0.00139481	0.00499702	0.101403	0.0507793	0.181922
South China	NX-13-11	796	7.9	0.003227	1060	10.16	0.7	3.48	0.34	0.000652123	0.0002942	0.00129121	0.0237412	0.0107107	0.0470079
South China	NX-13-12	797	8.1	0.002754	1050	10.32	0.7	3.72	0.3	0.00258956	0.00128998	0.00466883	0.0942754	0.0469632	0.169973
South China	NX-13-14	797	5.8	0.003068	1040	10.4	0.5	4.55	0.35	0.00103669	0.000483541	0.00198903	0.0377418	0.0176038	0.0724126
South China	NX-13-15	799	6.8	0.002184	1040	10.47	0.5	3.82	0.29	0.0136439	0.00765899	0.0219731	0.496721	0.278833	0.799954
South China	NX-13-16	808	7.2	0.002901	870	13.16	0.6	4.29	0.32	0.00168694	0.000814855	0.00313131	0.0614147	0.0296656	0.113998
South China	NX-13-17	805	6.9	0.002132	1030	10.64	0.6	4.02	0.23	0.0158774	0.00901041	0.0253081	0.578033	0.328033	0.921367
South China	NX-13-18	793	8.3	0.001073	1320	6.1	0.5	3.82	0.27	0.348055	0.246597	0.449818	12.6713	8.97761	16.3761
South China	NX-13-20	808	9.8	0.001859	1020	10.87	0.5	3.82	0.41	0.0351919	0.0211472	0.0531423	1.2812	0.769883	1.9347
South China	NX-13-21	797	6	0.002664	940	12.01	0.8	3.88	0.36	0.00336651	0.00170895	0.0059624	0.122561	0.0622161	0.217067
South China	NX-13-22	804	6.4	0.002574	1040	10.58	0.6	3.82	0.32	0.00437658	0.00226399	0.00761437	0.159334	0.0824229	0.277209
South China	NX-13-10	836	6.4	0.002101	930	12.54	0.6	3.66	0.29	0.0173793	0.00992697	0.0275324	0.632709	0.361401	1.00235
South China	NX-13-19	852	7.9	0.001623	980	12.06	0.5	3.9	0.14	0.0700258	0.0442124	0.100915	2.54936	1.6096	3.67391
South China	NX-13-23	868	8.3	0.002582	950	12.74	0.5	4.47	0.33	0.00427569	0.0022081	0.00745063	0.155661	0.0803879	0.271248
South China	NX-13-24	836	7.6	0.001774	1030	11.02	0.4	3.72	0.35	0.0450886	0.0275811	0.0669503	1.6415	1.00412	2.43739
South China	LZX@01	747.2	5.66	0.00172517	1412.99	3.82398	1.02057	4.21352	0.167879	0.0519868	0.0321278	0.0764501	1.89263	1.16964	2.78324
South China	LZX@02	747.3	4.8	0.00181391	1432.37	3.51749	0.986156	3.73925	0.192102	0.0401358	0.0243469	0.060069	1.46118	0.886374	2.18687
South China	LZX@03	746.6	7.1	0.00120601	1312.47	5.41081	0.936633	4.06933	0.130641	0.236178	0.162732	0.313378	8.59829	5.92444	11.4088
South China	LZX@04	748	8.91	0.00326442	1580.75	1.16784	1.05239	4.12334	0.167088	0.000584727	0.000261735	0.00116638	0.0212876	0.00952871	0.0424632
South China	LZX@05	749	4.53	0.0022627	1203.31	7.16918	1.23332	4.03762	0.157757	0.0108465	0.00598906	0.0177424	0.394877	0.218038	0.645928
South China	LZX@06	748.7	4.41	0.00121866	1366.47	4.58039	0.867737	3.83739	0.153467	0.227622	0.156422	0.302783	8.28681	5.69469	11.0231
South China	LZX@07	747.9	4.19	0.0023815	1387	4.24472	1.05879	5.8017	0.153779	0.00767126	0.00413166	0.0128472	0.27928	0.150417	0.467715
South China	LZX@08	751.5	4.27	0.00159165	1410.1	3.92236	1.19287	3.9499	0.162244	0.0767281	0.0487634	0.109889	2.79336	1.77528	4.00063
South China	LZX@09	751.3	9.05	0.00153507	1375.04	4.47605	1.07597	4.07082	0.158884	0.0904892	0.058195	0.128153	3.29435	2.11865	4.66555
South China	LZX@10	748.6	6.35	0.00144881	1404.36	3.97807	1.02354	4.13771	0.169325	0.116361	0.0761984	0.162002	4.23624	2.77408	5.89786
South China	LZX@11	747.8	5	0.00235804	1503.21	2.39851	1.24615	4.32351	0.184018	0.00821441	0.00444601	0.013693	0.299054	0.161861	0.498508
South China	LZX@12	747.8	7.24	0.00198967	1482.15	2.73316	1.00712	4.17091	0.147017	0.0240435	0.0140577	0.0372592	0.875327	0.511785	1.35646
South China	LZX@13	748.7	4.96	0.00134634	1494.22	2.55271	1.02037	4.03811	0.132311	0.156875	0.104959	0.21402	5.7112	3.82113	7.79162
South China	LZX@14	749.9	3.94	0.00220196	1433.3	3.53432	0.921993	4.05149	0.157378	0.0129479	0.00724096	0.0209265	0.47138	0.263614	0.761849
South China	LZX@15	747.1	12.15	0.00133466	1389.52	4.19524	1.08876	4.41169	0.176687	0.16231	0.108861	0.220923	5.90907	3.9632	8.04293
South China	LZX@16	748.2	3.86	0.00150901	1380.61	4.34985	0.978255	4.21748	0.200546	0.0976316	0.0631321	0.137557	3.55438	2.29839	5.0079
South China	LZX@17	749.2	11.31	0.00188822	1459.09	3.11658	0.985262	3.8483	0.141658	0.0323185	0.019302	0.0490864	1.17659	0.702707	1.78704
South China	LZX@18	747.7	4.87	0.00268642	1246.07	6.47624	1.12671	4.63507	0.161593	0.00315351	0.00159332	0.00561	0.114807	0.0580064	0.204238
South China	LZX@19	747	9.26	0.00169433	1297.83	5.6477	1.06472	3.88448	0.178577	0.0568771	0.0353779	0.0831324	2.07067	1.28797	3.02652
South China	LZX@20	746.9	3.67	0.00227012	1276.66	5.9818	0.956751	3.83194	0.158879	0.0106144	0.00585183	0.0173883	0.38643	0.213042	0.633039
South China	KYX@01	693.1	8.08	0.00117471	1222.63	6.18053	1.25079	4.64894	0.125256	0.258738	0.17945	0.341191	9.41963	6.53306	12.4214
South China	KYX@02	693.2	10.43	0.000937064	1463.65	2.36244	1.21137	5.00396	0.125643	0.517328	0.377117	0.65082	18.8338	13.7293	23.6938
South China	KYX@03	691.4	7.55	0.00117747	1344.57	4.22886	1.18475	5.14653	0.161037	0.256665	0.177909	0.338642	9.34414	6.47696	12.3286
South China	KYX@04	691.8	6.25	0.00157383	1738.77	-2.0281	1.25703	4.81186	0.159877	0.0808195	0.0515558	0.115341	2.94231	1.87694	4.19911
South China	KYX@05	693.5	5.63	0.00175522	1481.03	2.08989	1.07937	4.89554	0.151321	0.0476263	0.0292483	0.0704558	1.73388	1.06481	2.56501
South China	KYX@06	691.7	5.45	0.00110889	1353.02	4.09851	1.2517	7.6718	0.228704	0.313481	0.220437	0.408024	11.4126	8.02523	14.8545
South China	KYX@07	270.1	1.72	0.00109211	555.851	11.5232	1.09976	5.16831	0.1758	0.329198	0.232305	0.42706	11.9848	8.45729	15.5476
South China	KYX@08	689.1	11.43	0.00125521	1580.41	0.458371	1.09457	4.25167	0.103201	0.204616	0.13954	0.274158	7.44926	5.08008	9.98101
South China	KYX@09	699.1	14.48	0.0013129	1618.57	-0.0267072	1.10445	4.84206	0.11943	0.172938	0.116519	0.234377	6.296	4.24201	8.53273
South China	KYX@10	691.8	6.38	0.0010611	1299.67	4.94498	1.19148	4.24969	0.147687	0.360347	0.255943	0.464607	13.1188	9.31787	16.9145
South China	KYX@11	692.5	9.76	0.00112294	1374.13	3.77373	1.36508	8.34258	0.111698	0.300899	0.210968	0.39274	10.9545	7.68049	14.2981
South China	KYX@12	693.1	5.88	0.00150194	1405.64	3.28125	1.30054	4.77175	0.144206	0.0996642	0.064542	0.140224	3.62838	2.34972	5.10501
South China	KYX@13	273.3	7.67	0.00223104	588.473	11.0519	1.30483	7.40464	0.201848	0.0118955	0.00661203	0.0193367	0.433068	0.240718	0.703971
South China	KYX@14	689	7.37	0.0012782	1376.78	3.68909	1.38526	7.80708	0.163828	0.191352	0.129867	0.257556	6.96635	4.72792	9.37657
South China	KYX@15	694.6	6.05	0.000614202	1591.75	0.345543	1.19258	0.839689	0.142489	1.32606	1.03432	1.5649	48.2764	37.6554	56.9717
South China	KYX@16	691	7.27	0.00100485	1493.15	1.8675	1.04314	7.85299	0.153656	0.424554	0.305123	0.541327	15.4563	11.1083	19.7075
South China	KYX@17	690.8	5.45	0.00123334	1349.36	4.14557	1.20698	5.1401	0.163235	0.218088	0.14941	0.290946	7.93973	5.43943	10.5922
South China	KYX@18	688.4	4.97	0.00197928	1349.95	4.10679	1.33903	4.88167	0.132844	0.0247825	0.0145214	0.0383256	0.902231	0.528665	1.39528
South China	KYX@19	692	5.16	0.00117629	1487.83	1.96405	1.21264	8.09337	0.156316	0.257554	0.17857	0.339736	9.37652	6.50101	12.3684
South China	KYX@20	690.5	6.17	0.000905497	1251.55	5.69103	1.21889	5.13762	0.219761	0.567198	0.416215	0.709112	20.6494	15.1527	25.8159
South China	WJG@01	717.9	7.89	0.000634028	1620.66	0.169063	1.02067	4.46044	0.156744	1.25158	0.972182	1.48282	45.5651	35.3932	53.9835
South China	WJG@02	709.9	13.46	0.00103292	1565.48	0.948618	1.06919	5.11634	0.174563	0.391197	0.2795	0.501575	14.2419	10.1755	18.2603
South China	WJG@03	720.2	6.75	0.00124784	1574.13	0.936241	1.10991	4.66732	0.13002	0.209062	0.142792	0.279706	7.61112	5.19848	10.183
South China	WJG@04	719.4	4.47	0.00102191	1490.79	2.25053	1.14179	4.546	0.170735	0.403962	0.289287	0.516813	14.7066	10.5318	18.8151
South China	WJG@05	718.6	4.71	0.00107769	1614.98	0.267484	0.978406	5.03961	0.161731	0.343326	0.243007	0.444118	12.4991	8.84691	16.1685
South China	WJG@06	718.2	4.54	0.00081144	1353.16	4.41942	0.924457	4.85395	0.171604	0.74615	0.55843	0.915621	27.1643	20.3302	33.3341
South China	WJG@07	716.5	10.18	0.00118864	1489.85	2.23004	1.1337	5.14703	0.164139	0.248441	0.171806	0.328518	9.04476	6.25478	11.96
South China	WJG@08	718.9	10.84	0.0013559	1629.64	0.0377905	1.17038	4.57861	0.146222	0.152562	0.101869	0.20853	5.55417	3.70863	7.59175
South China	WJG@09	718.8	4.7	0.000911614	1657.29	-0.402825	0.858276	5.26335	0.183454	0.557172	0.408334	0.697422	20.2844	14.8658	25.3903
South China	WJG@10	718.8	4.45	0.00110688	1494.65	2.18186	1.08389	5.13564	0.158399	0.315322	0.221825	0.410257	11.4796	8.07576	14.9358
South China	WJG@11	717.5	3.84	0.00112246	1450.79	2.8623	1.03928	4.8277	0.143665	0.301314	0.21128	0.393244	10.9696	7.69184	14.3164
South China	WJG@12	713	11.52	0.00076634	1662.33	-0.553338	0.90006	4.95149	0.166437	0.851002	0.642951	1.035	30.9816	23.4073	37.6802
South China	WJG@13	719.7	5.58	0.000920348	1454.88	2.82433	0.921997	4.93218	0.124318	0.543163	0.39734	0.681064	19.7744	14.4656	24.7948
South China	WJG@14	718.6	4.37	0.00174158	1680.84	-0.78083	0.95224	4.85098	0.187542	0.0495587	0.0305221	0.0731167	1.80423	1.11119	2.66189
South China	WJG@15	718.9	5.28	0.00138215	1478.14	2.44512	0.973702	4.47865	0.139793	0.141322	0.0938457	0.194174	5.14497	3.41655	7.06908
South China	WJG@16	720.4	8.03	0.00121203	1708.05	-1.19148	1.10848	5.07129	0.144398	0.232065	0.159697	0.308289	8.44857	5.81393	11.2236
South China	WJG@17	720.5	7.09	0.00121925	1555.83	1.2307	1.0421	5.26384	0.14261	0.227235	0.156136	0.302303	8.2727	5.6843	11.0056
South China	WJG@18	646.1	3.21	0.00130332	1672.39	-1.5256	0.85967	4.71975	0.141821	0.177836	0.12006	0.240558	6.47431	4.37091	8.75776
South China	WJG@19	719.5	3.78	0.00112578	1470.94	2.56676	0.925782	4.77819	0.128549	0.298411	0.209098	0.389711	10.8639	7.61242	14.1878
South China	WJG@20	721.5	8.49	0.000738102	1467.05	2.65312	0.85556	4.83365	0.140144	0.924028	0.702266	1.11755	33.6402	25.5667	40.6855
South China	BK@01	784.6	5.05	0.00116779	1133.53	5.47986	1.05651	3.99795	0.155971	0.264017	0.183377	0.347675	9.6118	6.67603	12.6575
South China	BK@02	923.4	7.48	0.000276602	1061.75	10.1868	0.904586	4.80527	0.298355	3.5483	2.97054	3.91656	129.179	108.146	142.586
South China	BK@03	816.5	6.27	0.000172361	1036.09	8.46457	0.933341	4.84425	0.31128	4.80846	4.11442	5.19905	175.057	149.79	189.277
South China	BK@04	820.8	5.96	0.000511626	1209.85	4.16721	1.01148	4.70772	0.264612	1.7883	1.42517	2.06795	65.1048	51.8848	75.2859
South China	BK@05	866.2	5.61	0.000980226	980.8	11.0529	1.55185	4.3761	0.177708	0.456159	0.329532	0.578794	16.6069	11.997	21.0716
South China	BK@06	863.5	5.82	0.00104289	1054.29	9.15036	1.33478	4.46054	0.223334	0.379986	0.270923	0.488164	13.8338	9.86324	17.7721
South China	BK@07	819.2	6.23	0.000453508	1105	6.803	0.919752	4.61733	0.286986	2.11849	1.70901	2.42175	77.1259	62.2181	88.1661
South China	BK@08	794.5	5.67	0.000599231	1155.98	4.99025	1.09538	4.21023	0.188925	1.38522	1.08386	1.62987	50.4302	39.459	59.3372
South China	BK@09	743.9	5.55	0.000714246	1220.05	2.28518	1.07971	4.61155	0.279281	0.99058	0.75662	1.19239	36.0631	27.5455	43.4102
South China	BK@10	735	5.57	0.000391639	1189.52	2.77021	1.05582	4.42406	0.156777	2.53725	2.07353	2.86512	92.3711	75.4889	104.308
South China	BK@11	788.3	5.07	0.000780105	1084.02	6.72569	1.05217	4.58629	0.160042	0.817525	0.615879	0.997001	29.7628	22.4217	36.2968
South China	BK@12	780.5	6.07	0.000412006	1138.58	5.08282	0.946801	5.24995	0.135002	2.39098	1.94567	2.71086	87.0461	70.8341	98.6917
South China	BK@13	761.2	4.83	0.00162245	1176.12	4.03372	1.21036	5.02031	0.0870082	0.070138	0.0442884	0.101066	2.55344	1.61236	3.6794
South China	BK@14	808.2	5.63	0.000504185	1177.08	4.72757	1.04095	4.84676	0.124476	1.82752	1.4587	2.11019	66.5326	53.1055	76.8237
South China	BK@15	773	5.12	0.000663744	1160.55	4.42032	1.15851	4.99361	0.104699	1.14772	0.885968	1.36779	41.7837	32.2546	49.7958
South China	BK@16	763.4	5.22	0.000411544	1160.53	4.14394	1.00214	4.89867	0.123957	2.3942	1.94848	2.71427	87.1633	70.9364	98.8156
South China	BK@17	772.1	5.49	0.000402749	1134.16	5.00923	0.942934	4.73799	0.122673	2.45639	2.00278	2.77992	89.4272	72.9131	101.206
South China	BK@18	858.9	6.51	0.000270946	1197.5	5.26487	0.894659	4.67144	0.111922	3.60729	3.02351	3.97722	131.327	110.074	144.795
South China	BK@19	808.6	4.7	0.00100518	1086.29	7.15186	1.27746	5.08937	0.116271	0.424144	0.304807	0.54084	15.4414	11.0968	19.6898
South China	BK@20	852	6.6	0.000312526	1150.83	6.32249	0.934901	4.71471	0.0979534	3.19547	2.6551	3.55229	116.334	96.6616	129.325
Northern Madagascar	BB06A12	724	7	0.00406604		7.67786	2.05312	4.24035	0.262825	5.6489e-05	2.13756e-05	0.00013207	0.00205654	0.000778202	0.00480813
Northern Madagascar	BB06A12	724	7	0.00224187		7.09613	1.39491	3.38013	0.0640522	0.0115256	0.00639191	0.0187757	0.419602	0.232704	0.683547
Northern Madagascar	BB06A12	724	7	0.00221948		8.4502	1.49115	4.13083	0.157503	0.0123032	0.00685525	0.0199537	0.447912	0.249572	0.726435
Northern Madagascar	BB06A12	724	7	0.00345579		6.82291	1.79731	4.07107	0.140284	0.000334688	0.000143924	0.000693406	0.0121846	0.00523968	0.0252442
Northern Madagascar	BB06A12	724	7	0.00352019		7.91394	1.83312	4.66853	0.0946653	0.000277398	0.000117688	0.000582089	0.0100989	0.00428457	0.0211915
Northern Madagascar	BB06A12	724	7	0.00262859		7.7162	1.73711	4.63593	0.164325	0.00373259	0.00190889	0.00656456	0.135889	0.0694952	0.238989
Northern Madagascar	BB06A12	724	7	0.00283894		7.30427	1.44134	3.91284	0.0988304	0.00202154	0.000989263	0.00370655	0.0735962	0.0360151	0.134941
Northern Madagascar	BB06A12	724	7	0.00276174		7.71426	1.77564	4.45218	0.208751	0.00253174	0.00125914	0.0045716	0.0921706	0.0458402	0.166433
Northern Madagascar	BB06A12	724	7	0.0026162		8.65802	1.63777	4.56712	0.111017	0.00386989	0.00198426	0.00678935	0.140887	0.0722389	0.247173
Northern Madagascar	BB06A12	724	7	0.00303617		9.23478	1.8382	4.54465	0.269638	0.0011375	0.000534111	0.00216873	0.0414118	0.0194448	0.0789547
Northern Madagascar	BDW315A	718	7	0.000396101		7.0507	1.01112	5.01962	0.196519	2.50446	2.04482	2.83059	91.1773	74.4436	103.05
Northern Madagascar	BDW315A	718	7	0.000444562		7.74233	0.826327	4.9066	0.15936	2.17447	1.75746	2.48134	79.1638	63.982	90.3356
Northern Madagascar	BDW315A	718	7	0.000385114		7.32473	0.806787	5.36317	0.142735	2.58598	2.11625	2.91638	94.1453	77.0441	106.174
Northern Madagascar	BDW315A	718	7	0.000396783		7.36467	0.652676	5.13901	0.226205	2.49949	2.04047	2.82535	90.9963	74.2853	102.86
Northern Madagascar	BDW315A	718	7	0.00151326		7.39989	1.16967	4.62866	0.372342	0.0964294	0.0622992	0.135977	3.51061	2.26807	4.9504
Northern Madagascar	BDW315A	718	7	0.000439678		7.89579	0.964409	5.21962	0.244489	2.20566	1.78449	2.51449	80.2992	64.966	91.5426
Northern Madagascar	BDW315A	718	7	0.000466357		7.12674	0.853209	5.01949	0.124096	2.0406	1.64175	2.33865	74.2902	59.7694	85.1409
Northern Madagascar	BDW315A	718	7	0.00054746		7.43178	0.714873	5.18338	0.382018	1.6109	1.27419	1.87608	58.6464	46.3882	68.3005
Northern Madagascar	BT0636	754	7	0.00147983		-4.80283	1.2779	5.0756	0.0963511	0.106301	0.0691597	0.148908	3.86999	2.51783	5.42116
Northern Madagascar	BT0636	754	7	0.000857879		-2.96319	1.0189	5.50643	0.347061	0.65167	0.482997	0.807071	23.7247	17.584	29.3822
Northern Madagascar	BT0636	754	7	0.000635257		-2.6349	1.08324	5.33132	0.259835	1.2471	0.968454	1.47788	45.4021	35.2575	53.8035
Northern Madagascar	BT0636	754	7	0.00104558		-1.57737	0.922346	5.44472	0.272376	0.377024	0.268661	0.484617	13.7259	9.78087	17.643
Northern Madagascar	BT0636	754	7	0.0020928		-2.09019	1.14028	3.41437	0.510413	0.0177998	0.0101846	0.0281528	0.648018	0.370782	1.02493
Northern Madagascar	BT0636	754	7	0.000996051		-2.59267	0.89403	5.3479	0.658162	0.435591	0.313632	0.554431	15.8581	11.4181	20.1846
Northern Madagascar	BT0636	754	7	0.000819021		-2.16534	0.873614	5.65742	0.392422	0.72984	0.545357	0.896953	26.5706	19.8543	32.6545
Northern Madagascar	BT0636	754	7	0.000736044		-2.32137	0.778893	5.0406	0.140121	0.929586	0.706796	1.12381	33.8425	25.7316	40.9135
Northern Madagascar	BT0636	754	7	0.00157392		-1.86489	1.16664	1.58846	0.265663	0.0807975	0.0515408	0.115312	2.94152	1.87639	4.19804
Northern Madagascar	BT0636	754	7	0.00109501		-2.06019	0.846686	5.30941	0.303665	0.32642	0.230204	0.423699	11.8836	8.38079	15.4252
Northern Madagascar	BT0641	746	4	0.00217873		-5.35067	0.975338	0.601289	0.206844	0.013855	0.00778608	0.0222898	0.504406	0.28346	0.811484
Northern Madagascar	BT0641	746	4	0.00144456		-5.20424	0.826415	4.85975	0.190684	0.117813	0.0772182	0.163886	4.28911	2.8112	5.96644
Northern Madagascar	BT0641	746	4	0.00155775		-5.66916	0.989523	5.67351	0.12121	0.0846985	0.0542126	0.120493	3.08353	1.97366	4.38665
Northern Madagascar	BT0641	746	4	0.00223999		-5.75827	1.10577	2.01318	0.157785	0.0115889	0.00642955	0.0188718	0.421907	0.234074	0.687046
Northern Madagascar	BT0641	746	4	0.00122492		-5.6741	0.882832	4.94261	0.157213	0.223507	0.153393	0.297678	8.13698	5.58441	10.8373
Northern Madagascar	BT0641	746	4	0.000790908		-5.79246	0.787495	5.83282	0.261251	0.792179	0.595435	0.968159	28.8401	21.6774	35.2468
Northern Madagascar	BT0641	746	4	0.00167086		-5.39674	1.07274	5.52136	0.255384	0.0609063	0.0380709	0.0886086	2.21735	1.38601	3.22588
Northern Madagascar	BT0641	746	4	0.00172073		-5.89436	1.18774	2.21506	0.110281	0.0526635	0.0325763	0.0773773	1.91727	1.18597	2.817
Northern Madagascar	BT0641	746	4	0.000911246		-4.91095	0.838649	4.34583	0.280196	0.557771	0.408805	0.698121	20.3062	14.8829	25.4158
Northern Madagascar	BT0641	746	4	0.00199389		-4.37797	1.23765	4.97717	0.149426	0.0237496	0.0138736	0.0368345	0.864627	0.505082	1.341
Northern Madagascar	BT0751	768	8	0.000718477		-7.94535	0.701134	2.08052	0.148035	0.978437	0.746682	1.17876	35.621	27.1837	42.914
Northern Madagascar	BT0751	768	8	0.00110683		-6.80779	0.848693	2.20976	0.135681	0.315369	0.221861	0.410314	11.4813	8.07706	14.9379
Northern Madagascar	BT0751	768	8	0.00122034		-6.1822	0.953637	1.95804	0.307784	0.226515	0.155607	0.301411	8.24651	5.66502	10.9732
Northern Madagascar	BT0751	768	8	0.00153961		-5.62095	1.01048	2.68525	0.155732	0.0892979	0.0573742	0.12658	3.25098	2.08876	4.60828
Northern Madagascar	BT0751	768	8	0.00119369		-5.05605	0.999792	1.3438	0.358557	0.244812	0.169118	0.324043	8.91264	6.1569	11.7971
Northern Madagascar	BT0751	768	8	0.00115557		-4.35219	0.895138	2.23839	0.258369	0.273594	0.190516	0.359416	9.96047	6.93594	13.0849
Northern Madagascar	BT0751	768	8	0.00142185		-4.82717	1.26974	3.70178	0.318391	0.125877	0.082897	0.174318	4.58268	3.01795	6.34621
Northern Madagascar	BT0751	768	8	0.00100857		-10.0185	1.33089	2.65735	0.102012	0.419974	0.301596	0.535882	15.2896	10.9799	19.5093
Northern Madagascar	BT0751	768	8	0.00155763		-4.37278	1.05214	2.46706	0.0936885	0.0847288	0.0542334	0.120533	3.08464	1.97442	4.38812
Northern Madagascar	RK7219	750	4	0.00220746		-8.59942	1.54682	1.61324	0.363061	0.0127421	0.00711768	0.0206163	0.463889	0.259126	0.750557
Northern Madagascar	RK7219	750	4	0.00164035		-8.20531	1.3161	2.97407	0.382549	0.0665721	0.0418793	0.096268	2.42362	1.52466	3.50473
Northern Madagascar	RK7219	750	4	0.00184139		-8.14099	1.64031	3.4381	0.209667	0.0370458	0.0223434	0.0557469	1.34869	0.813435	2.02952
Northern Madagascar	RK7219	750	4	0.00228475		-7.6812	2.08611	3.94202	0.146698	0.0101713	0.00559035	0.0167107	0.370296	0.203522	0.608369
Northern Madagascar	RK7219	750	4	0.00138994		-6.65459	1.57374	2.31546	0.336503	0.138151	0.0915902	0.190109	5.02951	3.33443	6.92111
Northern Madagascar	RK7219	750	4	0.00156613		-6.81772	1.36	4.25432	0.160038	0.0826544	0.0528114	0.11778	3.00912	1.92265	4.2879
Northern Madagascar	RK7219	750	4	0.00155161		-6.07436	1.19911	3.54241	0.244922	0.0862273	0.0552621	0.122518	3.13919	2.01187	4.46041
Northern Madagascar	RK7219	750	4	0.00228213		-6.43335	1.64186	4.41159	0.139551	0.0102493	0.00563632	0.0168301	0.373135	0.205196	0.612717
Northern Madagascar	RK7219	750	4	0.00111882		-6.47275	1.16796	3.56356	0.20326	0.30453	0.213698	0.397155	11.0867	7.77988	14.4588
Northern Madagascar	RK7219	750	4	0.00114658		-5.00664	1.17328	3.75662	0.226626	0.280858	0.195943	0.368302	10.2249	7.13351	13.4084
Northern Madagascar	RT06467	756	6	0.00114565		-15.339	0.71481	6.38707	0.559252	0.281622	0.196515	0.369236	10.2527	7.15431	13.4424
Northern Madagascar	RT06467	756	6	0.00116941		-9.21545	0.998327	7.04056	0.231809	0.262772	0.182451	0.346147	9.56649	6.6423	12.6018
Northern Madagascar	RT06467	756	6	0.000908131		-14.0313	0.930437	7.08308	0.120988	0.56286	0.412804	0.704055	20.4915	15.0285	25.6318
Northern Madagascar	RT06467	756	6	0.000794517		-15.2415	0.955144	6.71865	0.284643	0.783888	0.588758	0.958711	28.5382	21.4343	34.9028
Northern Madagascar	RT06467	756	6	0.00112432		-13.8019	0.87978	6.90946	0.238898	0.299684	0.210055	0.391261	10.9103	7.64725	14.2442
Northern Madagascar	RT06467	756	6	0.000827923		-9.12322	0.832695	6.59268	0.216347	0.711142	0.530394	0.875515	25.8898	19.3095	31.874
Northern Madagascar	RT06467	756	6	0.000737802		-13.2556	0.789833	5.82985	0.228069	0.924835	0.702925	1.11846	33.6696	25.5907	40.7186
Northern Madagascar	RT06467	756	6	0.00051203		-8.42805	0.818547	6.2522	0.205971	1.78619	1.42338	2.06569	65.0282	51.8194	75.2033
Northern Madagascar	RT06467	756	6	0.000625671		-13.1992	0.835371	6.6303	0.208848	1.28245	0.997904	1.51688	46.6888	36.3297	55.2234
Northern Madagascar	RT06467	756	6	0.000558675		-12.2839	0.851757	5.79463	0.263381	1.55908	1.23031	1.81977	56.7599	44.7907	66.2505
Northern Madagascar	RT0678	738	7	0.00200531		10.0466	2.4693	1.86879	0.135926	0.0229714	0.0133869	0.0357083	0.836296	0.487364	1.3
Northern Madagascar	RT0678	738	7	0.00197255		20.3111	7.17895	2.35128	0.140691	0.0252737	0.0148301	0.0390331	0.920114	0.539904	1.42104
Northern Madagascar	RT0678	738	7	0.00332942		4.33069	5.754	2.03476	0.346794	0.000483776	0.000213617	0.000977512	0.0176123	0.00777695	0.0355873
Northern Madagascar	RT0678	738	7	0.00290467		10.7742	2.3922	3.18069	0.470201	0.001669	0.00080557	0.00310026	0.0607615	0.0293276	0.112868
Northern Madagascar	RT0678	738	7	0.00212179		9.04861	2.07452	2.66232	0.086376	0.016357	0.00930247	0.02602	0.595495	0.338666	0.947282
Northern Madagascar	RT0678	738	7	0.00134308		12.3613	3.75427	1.26581	0.249068	0.158374	0.106034	0.215925	5.76577	3.86027	7.86098
Northern Madagascar	RT07121	707	5	0.000825442		5.71866	1.09227	4.57571	0.217839	0.716304	0.534522	0.881437	26.0778	19.4598	32.0896
Northern Madagascar	RT07121	707	5	0.00078281		6.41052	0.926984	4.46588	0.184697	0.811104	0.610695	0.989699	29.529	22.233	36.031
Northern Madagascar	RT07121	707	5	0.000995917		7.42768	0.940571	5.55751	0.178681	0.435761	0.313764	0.554633	15.8643	11.4229	20.192
Northern Madagascar	RT07121	707	5	0.000754445		6.26339	0.938657	5.30971	0.28487	0.881032	0.6673	1.069	32.0749	24.2937	38.9181
Northern Madagascar	RT07121	707	5	0.000863076		7.05104	0.940406	4.71005	0.241649	0.64187	0.475216	0.795753	23.3679	17.3007	28.9702
Northern Madagascar	RT07121	707	5	0.000690777		5.78639	0.926938	4.83999	0.185581	1.06073	0.814198	1.27092	38.617	29.6417	46.2689
Northern Madagascar	RT07121	707	5	0.000757936		7.27794	1.03779	5.12171	0.126169	0.872109	0.660059	1.05891	31.75	24.0301	38.5506
Northern Madagascar	RT07121	707	5	0.00113449		7.04258	1.24406	4.62249	0.408882	0.290933	0.203487	0.380602	10.5917	7.40815	13.8562
Northern Madagascar	RT07121	707	5	0.000891719		7.23087	1.26191	4.81251	0.190482	0.590446	0.434528	0.736165	21.4958	15.8194	26.8008
Northern Madagascar	RT07121	707	5	0.000835251		7.50121	0.813591	4.80455	0.178392	0.696109	0.518386	0.858253	25.3426	18.8724	31.2455
Northern Madagascar	RT0776	713	6	0.00163562		5.73479	1.14974	4.83074	0.521521	0.0674968	0.0425031	0.0975137	2.45729	1.54737	3.55008
Northern Madagascar	RT0776	713	6	0.00105775		7.66578	0.997077	4.88409	0.305454	0.363874	0.25863	0.468844	13.2472	9.41567	17.0687
Northern Madagascar	RT0776	713	6	0.00265406		5.00281	1.33099	5.7563	0.100663	0.00346551	0.00176287	0.00612565	0.126165	0.0641791	0.22301
Northern Madagascar	RT0776	713	6	0.00165363		5.85823	1.09595	5.28816	0.194137	0.064043	0.0401763	0.0928547	2.33155	1.46266	3.38047
Northern Madagascar	RT0776	713	6	0.000662861		3.84266	0.932971	6.47044	0.339179	1.15067	0.888416	1.37108	41.8914	32.3437	49.9154
Northern Madagascar	RT0776	713	6	0.00305782		6.73162	1.71681	5.50026	0.36299	0.00106793	0.000499173	0.00204483	0.0388789	0.0181729	0.074444
Northern Madagascar	RT0776	713	6	0.00112229		7.28509	1.06339	5.81812	0.233277	0.301466	0.211393	0.393428	10.9752	7.69599	14.3232
Northern Madagascar	RT0776	713	6	0.00168149		7.7243	1.05239	5.44725	0.170894	0.0590464	0.0368262	0.086084	2.14964	1.34069	3.13397
Northern Madagascar	RT0776	713	6	0.000844296		6.4218	0.80267	5.66595	0.313339	0.677993	0.503939	0.837416	24.683	18.3464	30.487
Northern Madagascar	RT0776	713	6	0.00199811		5.656	1.24028	5.1167	0.166065	0.0234591	0.0136918	0.0364145	0.854054	0.498465	1.32571
India/Malani	RJW14-11@1	n,d	n,d	0.000719298		3.48763	1.51612	5.15298	0.31277	0.976098	0.744769	1.17614	35.5358	27.1141	42.8184
India/Malani	RJW14-11@2	806.216	261.569	0.000666213		-0.973119	0.637622	7.93674	0.249559	1.13948	0.879158	1.35864	41.484	32.0066	49.4627
India/Malani	RJW14-11@3	774.529	9.30281	0.000585276		-0.831442	0.346087	7.40014	0.267774	1.44274	1.13217	1.69287	52.5243	41.2178	61.6305
India/Malani	RJW14-11@5	751.187	10.948	0.000603834		1.8607	0.414454	7.20664	0.289496	1.36675	1.06838	1.60962	49.758	38.8955	58.5997
India/Malani	RJW14-11@7	741.092	11.6883	0.000584978		-0.23988	0.320582	7.69487	0.190592	1.44399	1.13323	1.69424	52.57	41.2563	61.6805
India/Malani	RJW14-11@9	757.889	8.7267	0.000984804		-0.836302	0.428624	7.452	0.201387	0.450111	0.324852	0.571638	16.3867	11.8266	20.8111
India/Malani	RJW14-11@10	759.451	8.8072	0.000509005		-0.977791	0.428624	8.22998	0.3028	1.80202	1.4369	2.08274	65.6043	52.3116	75.8241
India/Malani	RJW14-11@11	n,d	n,d	0.000602049		0.00440008	0.481759	8.02102	0.217699	1.37388	1.07436	1.61744	50.0176	39.113	58.8846
India/Malani	RJW14-11@12	n,d	n,d	0.00106365		-3.76006	0.609283	7.69736	0.236413	0.357673	0.253908	0.461392	13.0214	9.24376	16.7974
India/Malani	RJW14-11@14	715.448	8.34034	0.000359677		-1.19352	0.339671	7.32533	0.239833	2.78505	2.29134	3.1251	101.393	83.4183	113.772
India/Malani	RJW14-11@15	n,d	n,d	0.00133201		-1.53903	0.410912	6.9144	0.204656	0.163568	0.109766	0.222519	5.95487	3.99613	8.10101
India/Malani	RJW14-11@16	n,d	n,d	0.000816389		-2.18225	0.403827	7.39216	0.245269	0.735462	0.549861	0.903391	26.7752	20.0182	32.8888
India/Malani	RJW14-11@17	n,d	n,d	0.000879536		-2.36992	0.357777	7.78863	0.22361	0.611795	0.45139	0.760944	22.273	16.4333	27.7029
India/Malani	RJW14-11@20	763.321	9.18837	0.000925476		-1.27338	0.337231	7.91879	0.213211	0.535104	0.391023	0.67164	19.481	14.2356	24.4517
India/Malani	RJW14-11@21	768.258	9.07977	0.000882842		-1.68375	0.492386	7.35675	0.23542	0.605925	0.446749	0.754138	22.0593	16.2644	27.4551
India/Malani	RJW14-11@22	752.177	9.41541	0.000385069		-0.457463	0.456962	7.91231	0.291685	2.58632	2.11654	2.91674	94.1576	77.0549	106.187
India/Malani	RJW14-11@23	n,d	n,d	0.000447722		-0.617457	0.456962	7.66345	0.298461	2.15454	1.74019	2.46013	78.438	63.3534	89.5634
India/Malani	RJW14-11@25	756.25	8.54274	0.000617604		0.0223327	0.375488	7.02362	0.110949	1.31297	1.02338	1.5505	47.8	37.2572	56.4474
India/Malani	RJW14-11@26	759.286	9.65775	0.000482094		-1.22461	0.442793	7.76469	0.217161	1.94909	1.56296	2.24075	70.9586	56.901	81.5766
India/Malani	RJW14-11@27	755.084	9.8282	0.000787361		-1.42507	0.379031	7.54326	0.235144	0.800414	0.602073	0.977537	29.1399	21.9191	35.5882
India/Malani	RJW14-11@28	770.343	11.6678	0.000701285		-0.412121	0.361319	7.88587	0.272926	1.02873	0.787895	1.23514	37.4519	28.6841	44.9664
India/Malani	RJW14-11@29	n,d	n,d	0.000571479		-0.978105	0.417997	7.49938	0.282409	1.50195	1.18205	1.75754	54.6802	43.0339	63.9851
India/Malani	RJW14-11@30	n,d	n,d	0.000819408		-1.57858	0.49947	7.4515	0.380574	0.729016	0.544697	0.896009	26.5406	19.8302	32.6201
India/Malani	RJW14-12@1	758.73	9.62265	0.000566305		-1.00901	0.464052	7.62954	0.134271	1.52478	1.20132	1.78242	55.5111	43.7352	64.8909
India/Malani	RJW14-12@4	n,d	n,d	0.000546657		-0.833336	0.439255	7.73975	0.244459	1.61468	1.2774	1.88018	58.784	46.5049	68.4499
India/Malani	RJW14-12@5	n,d	n,d	0.000605576		-0.421206	0.488848	7.51235	0.253437	1.35983	1.06258	1.60201	49.5059	38.6843	58.3229
India/Malani	RJW14-12@6	745.887	8.46118	0.000612848		-1.57011	0.471137	7.90632	0.20734	1.3313	1.03871	1.57067	48.4674	37.8151	57.1817
India/Malani	RJW14-12@7	759.078	9.2929	0.000432948		-0.133254	0.605747	7.05902	0.17792	2.24936	1.82241	2.5609	81.8903	66.3468	93.2321
India/Malani	RJW14-12@8	766.164	9.67768	0.000488241		-1.96905	0.616374	7.61608	0.222995	1.91447	1.53322	2.20363	69.6983	55.8184	80.2252
India/Malani	RJW14-12@10	732.746	11.9413	0.000513248		-1.43967	0.364865	7.89734	0.235245	1.77987	1.41797	2.05886	64.7978	51.6226	74.9549
India/Malani	RJW14-12@11	761.646	9.9623	0.000476805		-1.25817	0.52073	7.97963	0.20831	1.97938	1.58901	2.27318	72.0613	57.8493	82.7575
India/Malani	RJW14-12@12	n,d	n,d	0.000810634		3.06845	0.665967	7.69288	0.260685	0.747906	0.559839	0.917629	27.2283	20.3815	33.4072
India/Malani	RJW14-12@14	762.918	10.0182	0.00051641		-0.250823	0.531357	7.70784	0.209075	1.76353	1.40402	2.04124	64.203	51.1149	74.3135
India/Malani	RJW14-12@15	750.682	9.67268	0.000828575		-1.62876	0.456967	7.08944	0.245937	0.70979	0.529314	0.873964	25.8406	19.2702	31.8175
India/Malani	RJW14-12@16	n,d	n,d	0.000778997		1.36569	0.598662	7.63802	0.220531	0.820171	0.618016	1.00001	29.8591	22.4995	36.4063
India/Malani	RJW14-12@17	762.734	10.7747	0.00065135		-2.05532	0.588035	7.04057	0.256927	1.18994	0.920956	1.41464	43.3211	33.5283	51.5014
India/Malani	RJW14-12@19	767.271	12.8849	0.000581707		-0.0111475	0.375492	7.35176	0.21614	1.45783	1.14487	1.70936	53.0736	41.6801	62.2311
India/Malani	RJW14-12@21	765.293	9.48958	0.00073763		0.192344	0.552611	7.4151	0.226047	0.925298	0.703302	1.11898	33.6864	25.6044	40.7376
India/Malani	RJW14-12@22	n,d	n,d	0.000455122		-1.19038	0.492391	7.63154	0.228512	2.10855	1.70041	2.41115	76.7638	61.9051	87.7803
India/Malani	RJW14-12@23	n,d	n,d	0.00056179		0.2399	0.334046	7.12186	0.283092	1.54499	1.21839	1.80443	56.2467	44.3567	65.6921
India/Malani	RJW14-12@24	764.818	9.88388	0.000680369		0.0131779	0.410916	8.0694	0.189604	1.09341	0.841113	1.30737	39.8067	30.6216	47.5961
India/Malani	RJW14-12@25	772.306	13.2149	0.000879548		1.00927	0.701391	7.83052	0.28652	0.611773	0.451372	0.760918	22.2722	16.4326	27.702
India/Malani	RJW14-12@26	n,d	n,d	0.000471248		-0.137595	0.414458	7.48591	0.19478	2.01171	1.61684	2.30777	73.2384	58.8628	84.0168
India/Malani	RJW14-56@5	625.46	27.182	0.00136681		-18.3287	0.268511	n,d	n,d	0.147786	0.0984543	0.202439	5.38031	3.58433	7.37
India/Malani	RJW14-56@14	738.008	13.6161	0.00153457		8.85565	0.400287	n,d	n,d	0.0906204	0.0582854	0.128327	3.29913	2.12194	4.67186
India/Malani	RJW14-56@1	748.904	9.31527	0.00150772		5.51748	0.446337	1.48841	0.220162	0.0979981	0.0633862	0.138038	3.56772	2.30764	5.02542
India/Malani	RJW14-56@13	747.155	13.7544	0.00181175		4.67405	0.442795	1.66644	0.317086	0.04039	0.0245123	0.0604236	1.47044	0.892394	2.19978
India/Malani	RJW14-56@19	762.089	10.0081	0.00157973		6.84675	0.324834	1.59463	0.202734	0.0794401	0.0506132	0.113505	2.8921	1.84262	4.13227
India/Malani	RJW14-56@7	763.244	9.93411	0.00167455		4.7871	0.425083	1.44901	0.239539	0.0602547	0.0376345	0.0877247	2.19363	1.37012	3.19371
India/Malani	RJW14-56@6	773.255	10.5141	0.00165634		7.84899	0.389659	n,d	n,d	0.0635399	0.0398381	0.0921746	2.31323	1.45035	3.35571
India/Malani	RJW14-56@11	779.046	10.4352	0.00156057		5.61646	0.393202	1.02162	0.139287	0.0840049	0.0537369	0.119573	3.05828	1.95634	4.35316
India/Malani	RJW14-56@18	774.329	10.4045	0.00123028		6.4704	0.287994	1.39465	0.254692	0.220043	0.150846	0.293376	8.01088	5.49169	10.6806
India/Malani	RJW14-56@16	781.168	10.0754	0.00142965		5.98952	0.361321	n,d	n,d	0.123047	0.0809011	0.170662	4.47966	2.94528	6.21314
India/Malani	RJW14-56@12	770.171	11.3546	0.00146496		8.05459	0.357778	1.41659	0.165473	0.11101	0.0724486	0.155047	4.04142	2.63756	5.64466
India/Malani	RJW14-56@20	799	9.40994	0.00160504		7.33537	0.304997	5.62016	0.285401	0.0737912	0.0467655	0.105964	2.68644	1.70255	3.85771
India/Malani	RJW14-56@2	824.007	10.0141	0.00180219		-1.1839	0.302553	6.45649	0.221316	0.0415315	0.0252555	0.0620137	1.512	0.919454	2.25767
India/Malani	RJW14-56@10	846.831	14.0794	0.00167352		-15.4754	0.295827	11.2301	0.181126	0.0604352	0.0377553	0.0879696	2.2002	1.37452	3.20262
India/Malani	RJW14-56@3	883.315	11.4755	0.000813273		-9.9658	0.327395	7.33022	0.282134	0.742174	0.555241	0.911073	27.0196	20.2141	33.1685
India/Malani	RJW14-56@4	1443.13	13.7449	0.000668565		-11.3299	0.369073	8.57448	0.32399	1.1317	0.87272	1.34999	41.2005	31.7723	49.1477
India/Malani	RJW14-56@8	1710.65	13.1388	0.000714962		-5.25571	0.310268	7.67033	0.159644	0.988516	0.75493	1.19008	35.9879	27.484	43.3259
India/Malani	RJW14-56@9	2287.79	17.4788	0.000781261		0.711979	0.308029	n,d	n,d	0.814776	0.61366	0.993876	29.6627	22.3409	36.183
India/Malani	RJW14-56@17	2267.41	15.2494	0.0005145		-3.21329	0.269118	7.81895	0.21124	1.77338	1.41243	2.05187	64.5616	51.421	74.7002
India/Malani	RJW14-82@1	779.408	9.54408	0.00132954		8.6326	0.400295	3.40552	0.192378	0.164749	0.110616	0.224016	5.99787	4.02707	8.15552
India/Malani	RJW14-82@2	n,d	n,d	0.00363523		4.03313	0.517195	3.53369	0.212905	0.000198354	8.21493e-05	0.000425819	0.00722129	0.00299073	0.0155023
India/Malani	RJW14-82@3	775.625	9.30625	0.00202315		8.743	0.506567	3.16265	0.196119	0.0218071	0.012661	0.0340184	0.793908	0.460935	1.23847
India/Malani	RJW14-82@4	761.493	9.08857	0.00188791		3.93338	0.48177	3.25591	0.266136	0.0323478	0.0193207	0.0491279	1.17765	0.703389	1.78855
India/Malani	RJW14-82@5	777.761	10.4073	0.000882075		8.44273	0.51011	3.42497	0.230679	0.607283	0.447822	0.755712	22.1087	16.3034	27.5124
India/Malani	RJW14-82@6	783.928	11.3453	0.00209265		4.46414	0.669519	3.59852	0.259197	0.0178076	0.0101895	0.0281644	0.648305	0.370958	1.02535
India/Malani	RJW14-82@7	768.224	9.48918	0.00143912		13.2369	0.453431	2.91081	0.188935	0.119695	0.0785408	0.166324	4.35761	2.85936	6.05521
India/Malani	RJW14-82@8	770.254	9.09727	0.00185628		5.81192	0.478228	3.50377	0.203596	0.0354723	0.0213278	0.0535368	1.2914	0.77646	1.94906
India/Malani	RJW14-82@9	802.146	528.194	0.00250853		6.41281	0.644722	3.24095	0.256121	0.00529706	0.00277801	0.00909708	0.192845	0.101136	0.331188
India/Malani	RJW14-82@10	772.766	9.79654	0.00157548		9.50866	0.513652	3.34368	0.159549	0.0804308	0.05129	0.114824	2.92816	1.86726	4.18028
India/Malani	RJW14-82@11	n,d	n,d	0.00107983		9.36488	0.506567	3.46826	0.249572	0.341192	0.241389	0.441545	12.4214	8.788	16.0749
India/Malani	RJW14-82@12	n,d	n,d	0.00113075		11.2517	0.446346	3.74903	0.200574	0.294125	0.205881	0.384492	10.7079	7.49531	13.9978
India/Malani	RJW14-82@13	783.985	9.26542	0.00210963		10.0694	0.527822	3.2214	0.197976	0.0169475	0.00966286	0.0268943	0.61699	0.351786	0.979115
India/Malani	RJW14-82@15	1461.64	913.21	0.000814836		9.03432	0.715571	3.21342	0.180327	0.7388	0.552536	0.907212	26.8968	20.1156	33.028
India/Malani	RJW14-82@16	592.263	121.241	0.0013706		11.754	0.549077	3.38248	0.259523	0.146163	0.0972957	0.200366	5.32121	3.54215	7.29453
India/Malani	RJW14-82@17	759.3	8.76137	0.00130119		8.27365	0.312442	3.79241	0.157158	0.178948	0.120865	0.241959	6.51477	4.4002	8.80876
India/Malani	RJW14-82@18	771.174	8.85292	0.0015921		9.22248	0.324841	4.12306	0.228	0.076626	0.0486938	0.109753	2.78964	1.77275	3.99566
India/Malani	RJW14-82@19	n,d	n,d	0.00195797		6.62492	0.301815	3.46726	0.239246	0.0263716	0.0155217	0.0406112	0.960083	0.565082	1.47849
India/Malani	RJW14-82@20	928.461	17.6897	0.00150816		10.8828	0.290576	3.05782	0.385269	0.097873	0.0632995	0.137874	3.56316	2.30448	5.01944
India/Malani	RJW14-82@21	769.78	8.92569	0.00151133		9.88186	0.25718	3.67821	0.184559	0.0969715	0.0626747	0.13669	3.53034	2.28174	4.97633
India/Malani	RJW14-82@22	757.24	9.32893	0.00179492		6.50086	0.331217	3.98092	0.204851	0.0424202	0.0258352	0.0632496	1.54435	0.940558	2.30267
India/Malani	RJW14-82@23	758.303	10.2963	0.0021776		5.6952	0.343261	3.55852	0.250704	0.013901	0.00781379	0.0223588	0.506081	0.284469	0.813994
India/Malani	RJW14-82@24	775.38	8.76598	0.00139105		6.98419	0.345741	3.73457	0.185562	0.137703	0.0912719	0.189534	5.0132	3.32284	6.90019
India/Malani	RJW14-82@25	752.293	10.3192	0.00172474		7.07595	0.331926	3.4538	0.17957	0.0520524	0.0321713	0.0765401	1.89502	1.17123	2.78652
India/Malani	RJW14-82@26	761.367	9.07977	0.00190599		7.15717	0.287645	3.73806	0.235336	0.0306861	0.0182589	0.0467715	1.11716	0.664733	1.70276
India/Malani	RJW14-82@27	n,d	n,d	0.0019358		6.11828	0.396752	3.72459	0.148886	0.028132	0.0166349	0.0431324	1.02417	0.60561	1.57028
India/Malani	RJW14-82@28	n,d	n,d	0.00151796		6.74013	0.307129	3.43185	0.204837	0.0951154	0.0613897	0.13425	3.46277	2.23495	4.88749
India/Malani	RJW14-82@29	763.361	8.54671	0.00181276		3.80448	0.289771	3.7615	0.231617	0.0402708	0.0244347	0.0602574	1.4661	0.889571	2.19373
India/Malani	RJW14-95@1	772.033	10.6919	0.0015317		6.62993	0.314219	1.66345	0.221802	0.0913805	0.0588096	0.12933	3.3268	2.14102	4.70837
India/Malani	RJW14-95@2	774.734	9.76714	0.00129243		7.39186	0.328034	1.55224	0.249538	0.183575	0.124218	0.247786	6.68324	4.52227	9.02089
India/Malani	RJW14-95@3	776.086	9.85702	0.00139762		8.03595	0.297569	1.7976	0.192619	0.135089	0.0894165	0.18618	4.91806	3.2553	6.77805
India/Malani	RJW14-95@4	778.806	10.4385	0.00135368		9.604	0.289775	1.38717	0.278317	0.153553	0.102578	0.209792	5.59024	3.73445	7.63769
India/Malani	RJW14-95@5	795.549	11.1399	0.00154629		8.54461	0.309613	1.94272	0.246219	0.0875771	0.0561899	0.124305	3.18833	2.04565	4.52545
India/Malani	RJW14-95@6	771.731	9.69419	0.00129401		5.01164	0.481778	1.50636	0.166066	0.18273	0.123605	0.246722	6.65246	4.49996	8.98217
India/Malani	RJW14-95@7	788.445	9.9737	0.00152146		9.19965	0.520746	2.1068	0.243799	0.0941506	0.0607225	0.13298	3.42765	2.21066	4.84127
India/Malani	RJW14-95@8	780.686	9.59746	0.00149894		6.55776	0.309968	1.43754	0.235025	0.10054	0.0651502	0.141373	3.66026	2.37186	5.14681
India/Malani	RJW14-95@9	774.319	10.0215	0.00149324		6.64718	0.324138	1.25052	0.208124	0.102223	0.0663201	0.143577	3.72154	2.41445	5.22708
India/Malani	RJW14-95@11	793.739	9.90231	0.00156296		6.86017	0.343621	-1.10884	0.250652	0.0834225	0.0533377	0.1188	3.03708	1.94181	4.32503
India/Malani	RJW14-95@12	711.221	27.8692	0.00167643		5.49423	0.499413	1.50087	0.267359	0.0599241	0.0374132	0.087276	2.1816	1.36207	3.17737
India/Malani	RJW14-95@13	779.607	9.55277	0.00137263		8.28577	0.432183	1.43903	0.227757	0.145301	0.0966811	0.199265	5.28985	3.51977	7.25444
India/Malani	RJW14-95@14	795.066	11.4801	0.00129284		6.8221	0.478236	1.29441	0.258412	0.183356	0.124059	0.24751	6.67525	4.51648	9.01085
India/Malani	RJW14-95@15	787.276	9.82127	0.0014052		8.41621	0.312093	1.83451	0.213655	0.132139	0.087325	0.182387	4.81065	3.17915	6.63998
India/Malani	RJW14-95@16	n,d	n,d	0.0011502		7.02185	0.488863	1.48741	0.242358	0.277904	0.193735	0.36469	10.1174	7.05313	13.2769
India/Malani	RJW14-95@17	775.385	8.97997	0.00171017		8.49796	0.481778	1.63303	0.174071	0.054311	0.0336698	0.0796311	1.97724	1.22578	2.89905
India/Malani	RJW14-95@18	768.241	9.54493	0.001451		8.08018	0.27596	1.35824	0.175777	0.115622	0.0756801	0.161044	4.20935	2.75521	5.86296
India/Malani	RJW14-95@19	762.999	13.6913	0.00160862		7.61702	0.330868	1.75621	0.26413	0.0730248	0.0462451	0.104937	2.65854	1.6836	3.82035
India/Malani	RJW14-95@20	770.17	10.6357	0.00143581		7.11207	0.3252	1.68639	0.242848	0.120859	0.0793596	0.167831	4.39998	2.88917	6.11006
India/Malani	RJW14-95@21	773.227	9.67769	0.00132276		8.47901	0.316344	1.72778	0.254844	0.168041	0.112986	0.228185	6.11771	4.11338	8.30731
India/Malani	RJW14-95@22	766.957	10.6828	0.00134107		9.95521	0.340433	1.80009	0.171568	0.159302	0.1067	0.217105	5.79957	3.88453	7.90392
India/Malani	RJW14-95@23	778.958	9.69673	0.00134438		10.1033	0.315281	1.51833	0.27128	0.157774	0.105603	0.215162	5.7439	3.84458	7.83319
India/Malani	RJW14-95@24	n,d	n,d	0.00107515		7.73547	0.566798	1.30339	0.205984	0.345877	0.244943	0.447192	12.592	8.91738	16.2805
India/Malani	RJW14-95@25	785.481	9.63166	0.00144699		12.1079	0.549086	1.54476	0.159545	0.116982	0.0766341	0.162808	4.25884	2.78994	5.92718
India/Malani	RJW14-95@26	762.031	10.8797	0.00133846		8.03655	0.308551	1.39914	0.185377	0.160522	0.107576	0.218654	5.84397	3.91642	7.9603
India/Malani	RJW14-95@27	783.001	9.73835	0.00139296		8.76735	0.28765	1.51534	0.268487	0.136938	0.0907287	0.188553	4.98536	3.30307	6.86447
India/Malani	RJW14-95@28	775.871	9.84747	0.00140277		10.3859	0.346101	1.57169	0.218216	0.133077	0.0879898	0.183594	4.84481	3.20336	6.68391
India/Malani	RJW14-95@29	773.312	10.2275	0.00146443		8.69279	0.302528	1.24055	0.355665	0.11118	0.072568	0.15527	4.04764	2.64191	5.65274
India/Malani	RJW14-95@30	788.02	13.2221	0.00141981		6.91995	0.31351	1.3358	0.344795	0.126628	0.0834272	0.175287	4.61002	3.03725	6.38149
Central Madagascar	DA14-133-11	824	23	0.001808		5.39	1.9	6	0.56	0.0408336	0.0248009	0.0610418	1.48659	0.902902	2.22229
Central Madagascar	DA14-133-19	824	23	0.002332		4.96	1.23	5.56	0.55	0.00886231	0.00482292	0.014697	0.322641	0.175583	0.535061
Central Madagascar	DA14-133-23	824	23	0.002747		7.14	0.82	5.52	0.54	0.00264295	0.00131851	0.00475848	0.0962192	0.0480018	0.173237
Central Madagascar	DA14-133-24	824	23	0.004258		11.03	1.88	5.16	0.55	3.22785e-05	1.17328e-05	7.83908e-05	0.00117513	0.000427143	0.00285389
Central Madagascar	DA14-133-25	824	23	0.000867		4.47	1.35	6.17	0.55	0.634568	0.469423	0.787312	23.1021	17.0898	28.6629
Central Madagascar	DA14-140-04	770	21	0.001763		10.71	1.33	5.7	0.54	0.046558	0.0285457	0.0689818	1.69499	1.03923	2.51135
Central Madagascar	DA14-140-12	770	21	0.001334		5.16	1.53	6.6	0.56	0.162622	0.109085	0.221319	5.92042	3.97136	8.05732
Central Madagascar	DA14-140-17	770	21	0.002218		10.14	1.42	7.75	0.52	0.0123563	0.00688696	0.020034	0.449845	0.250727	0.729357
Central Madagascar	DA14-140-30	770	21	0.001746		3.89	1.35	7.12	0.54	0.0489237	0.0301032	0.0722432	1.78112	1.09594	2.63009
Central Madagascar	DA14-146-10	774	11	0.002282		8.91	1.86	7.33	0.55	0.0102531	0.00563857	0.0168359	0.373274	0.205278	0.612929
Central Madagascar	DA14-146-24	774	11	0.002228		8.35	1.91	6.37	0.54	0.0120013	0.00667507	0.0194969	0.436919	0.243013	0.709804
Central Madagascar	DA14-146-38	552	11	0.001136		3.74	1.71	6.16	0.53	0.289654	0.202528	0.379042	10.5452	7.37325	13.7994
Central Madagascar	DA14-146-40	552	11	0.003705		7.33	1.87	6.81	0.54	0.000161846	6.60565e-05	0.000352279	0.00589218	0.00240485	0.0128251
Central Madagascar	DA13-055-31	780	7	0.000916		1.64	2.37	5.39	0.17	0.550093	0.402776	0.689159	20.0267	14.6635	25.0895
Central Madagascar	DA13-055-32	780	7	0.000782		1.53	2.38	5.21	0.16	0.813022	0.612244	0.991881	29.5989	22.2893	36.1104
Central Madagascar	DA13-055-33	780	7	0.001273		1.83	2.36	4.38	0.33	0.194274	0.131994	0.26122	7.07275	4.80537	9.50998
Central Madagascar	DA13-055-35	780	7	0.001099		2.03	2.33	5.67	0.15	0.322647	0.227353	0.419134	11.7463	8.27702	15.259
Central Madagascar	DA13-055-40	780	7	0.000683		1.52	2.38	5.54	0.16	1.08506	0.834227	1.29806	39.5026	30.3709	47.2571
Central Madagascar	DA13-055-41	780	7	0.001239		2.53	2.41	5.85	0.16	0.214519	0.14679	0.286505	7.80977	5.34405	10.4305
Central Madagascar	DA13-055-44	780	7	0.000876		2.38	2.39	5.61	0.15	0.618134	0.456405	0.768291	22.5038	16.6159	27.9704
Central Madagascar	DA13-055-45	780	7	0.001225		2.46	2.38	5.66	0.16	0.223456	0.153355	0.297614	8.13513	5.58304	10.835
Central Madagascar	DA13-063-05	798	8	0.000492		1.46	3.08	5.36	0.17	1.89361	1.51532	2.18124	68.9387	55.1666	79.41
Central Madagascar	DA13-063-07	798	8	0.000717		1.69	3.09	5.31	0.17	0.982659	0.750137	1.1835	35.7747	27.3095	43.0866
Central Madagascar	DA13-063-08	798	8	0.000781		1.95	3.07	4.8	0.15	0.815396	0.61416	0.99458	29.6853	22.3591	36.2087
Central Madagascar	DA13-063-11	798	8	0.001059		2.44	3.33	5.95	0.15	0.362556	0.257625	0.46726	13.1992	9.3791	17.0111
Central Madagascar	DA13-063-13	798	8	0.000555		1.96	2.99	5.25	0.13	1.57587	1.24452	1.83803	57.3713	45.308	66.9154
Central Madagascar	DA13-063-14	798	8	0.001464		2.36	2.95	4.2	0.16	0.111321	0.0726665	0.155453	4.05276	2.6455	5.65942
Central Madagascar	DA13-063-15	798	8	0.000985		1.76	3	1.91	0.2	0.449853	0.324652	0.571333	16.3774	11.8193	20.8
Central Madagascar	DA13-064-10	2500	28	0.000566		2.62	2.77	6.45	0.16	1.52614	1.20247	1.7839	55.5606	43.777	64.9448
Central Madagascar	DA13-064-11	819	19	0.000567		2.77	3.36	5.03	0.14	1.5217	1.19871	1.77906	55.3988	43.6404	64.7686
Central Madagascar	DA13-064-20	819	19	0.00072		3.7	3.95	4.11	0.17	0.974102	0.743137	1.17389	35.4632	27.0546	42.7368
Central Madagascar	DA13-064-21	2462	30	0.000554		2.86	2.2	6.6	0.15	1.58048	1.24842	1.84303	57.5388	45.4498	67.0975
Central Madagascar	DA13-064-22	819	19	0.000652		2.24	2.89	4.51	0.31	1.18769	0.919087	1.41214	43.2391	33.4603	51.4105
Central Madagascar	DA13-064-29	2489	30	0.000769		3.48	2.81	5.75	0.18	0.844428	0.637628	1.02755	30.7422	23.2135	37.4089
Central Madagascar	DA13-064-30	819	19	0.000405		2.44	2.86	4.74	0.16	2.44032	1.98874	2.76296	88.8422	72.402	100.588
Central Madagascar	DA13-064-52	2445	30	0.001017		3.53	2.79	7.48	0.14	0.409783	0.293758	0.523751	14.9185	10.6945	19.0677
Central Madagascar	DA13-064-53	819	19	0.001216		2.55	2.96	4.7	0.2	0.229397	0.157729	0.304983	8.35141	5.74229	11.1032
Central Madagascar	DA13-064-60	819	19	0.001046		2.21	3.02	4.5	0.15	0.376561	0.268307	0.484061	13.7091	9.76797	17.6227
Central Madagascar	DA13-065-13	791	17	0.000674		2.58	3.01	4.61	0.13	1.1139	0.858022	1.3302	40.5528	31.2372	48.4271
Central Madagascar	DA13-065-16	791	17	0.001028		3.36	2.95	4.93	0.15	0.396849	0.283831	0.508327	14.4477	10.3332	18.5062
Central Madagascar	DA13-065-20	791	17	0.00068		2.63	2.6	5.33	0.15	1.09459	0.842084	1.30868	39.8496	30.6569	47.6439
Central Madagascar	DA13-065-21	791	17	0.001273		3.39	2.97	4.69	0.19	0.194274	0.131994	0.26122	7.07275	4.80537	9.50998
Central Madagascar	DA13-065-23	791	17	0.001381		3.94	3.19	5.09	0.16	0.141798	0.0941845	0.194783	5.16229	3.42888	7.09127
Central Madagascar	DA13-012-77	849	17	0.000788		2.68	3.23	5.79	0.28	0.798924	0.600871	0.97584	29.0856	21.8753	35.5264
Central Madagascar	DA13-012-81	849	17	0.000957		1.93	3.09	5.79	0.17	0.488117	0.354339	0.616501	17.7704	12.9001	22.4443
Central Madagascar	DA13-012-83	849	17	0.000869		1.99	2.52	6.99	0.13	0.630879	0.466499	0.783045	22.9678	16.9834	28.5075
Central Madagascar	DA13-012-84	849	17	0.004887		4.48	3.04	6.23	0.15	5.15818e-06	1.64339e-06	1.4189e-05	0.000187789	5.98292e-05	0.000516565
Central Madagascar	DA13-012-88	849	17	0.001181		2.28	2.64	6.31	0.16	0.25404	0.17596	0.335413	9.24859	6.40599	12.2111
Central Madagascar	DA13-012-89	849	17	0.001755		2.35	2.27	6.53	0.16	0.0476567	0.0292683	0.0704978	1.73499	1.06554	2.56654
Central Madagascar	DA13-017-05	823	17	0.001091		2.61	2.98	7.24	0.24	0.330261	0.233109	0.428345	12.0235	8.48656	15.5943
Central Madagascar	DA13-017-06	823	17	0.000954		2.31	2.98	6.92	0.25	0.492404	0.357677	0.621547	17.9265	13.0216	22.628
Central Madagascar	DA13-017-10	823	17	0.001478		3.71	2.92	4.54	0.25	0.106869	0.0695559	0.14965	3.89067	2.53225	5.44816
Central Madagascar	DA13-017-12	823	17	0.001996		5.57	2.8	8.33	0.25	0.0236036	0.0137822	0.0366235	0.859313	0.501756	1.33332
Central Madagascar	DA13-017-18	620	20	0.001159		3.52	3.13	8.03	0.25	0.270868	0.188483	0.356077	9.86123	6.86189	12.9633
Central Madagascar	DA13-017-19	2681	20	0.001124		2.1	2.66	6.02	0.25	0.299967	0.210267	0.391606	10.9206	7.655	14.2568
Central Madagascar	DA13-017-22	823	17	0.000801		3.63	2.89	7.04	0.25	0.76921	0.57695	0.941969	28.0039	21.0044	34.2933
Central Madagascar	DA13-017-25	823	17	0.001043		2.93	3.03	5.3	0.25	0.379869	0.270834	0.488024	13.8295	9.85997	17.767
Central Madagascar	DA13-017-26	823	17	0.00101		3.87	2.96	4.46	0.25	0.418232	0.300254	0.533809	15.2261	10.9311	19.4338
Central Madagascar	DA13-017-27	2622	20	0.000586		1.72	2.67	6.54	0.25	1.4397	1.12961	1.68954	52.4135	41.1247	61.5094
Central Madagascar	DA13-017-28	823	17	0.00102		4.97	2.8	5.89	0.25	0.406214	0.291017	0.519499	14.7886	10.5947	18.9129
Central Madagascar	DA13-017-29	541	20	0.000429		4.56	2.98	0.61	0.27	2.2754	1.84504	2.58852	82.8383	67.1705	94.2377
Central Madagascar	DA13-017-32	823	17	0.000616		1.39	3.01	6.63	0.24	1.31912	1.02852	1.55727	48.024	37.4445	56.694
Central Madagascar	DA13-017-34	823	17	0.001477		4.05	3.04	6.33	0.25	0.107181	0.0697736	0.150057	3.90203	2.54018	5.46298
Central Madagascar	DA13-017-37	2377	20	0.000628		3.62	2.72	5.52	0.25	1.27377	0.990669	1.50731	46.3729	36.0663	54.8751
Central Madagascar	DA13-017-40	2603	20	0.001148		2.23	2.87	3.58	0.25	0.279696	0.195074	0.366881	10.1826	7.10187	13.3567
Central Madagascar	DA13-017-43	2477	20	0.000161		1.83	2.57	6.88	0.25	4.97039	4.26311	5.36206	180.952	155.203	195.211
Central Madagascar	DA13-017-44	823	17	0.000438		1.39	2.95	6	0.25	2.21648	1.79387	2.52598	80.693	65.3076	91.9609
Central Madagascar	DA13-017-49	823	17	0.001307		2.26	2.96	7.24	0.25	0.175941	0.118689	0.238167	6.40529	4.32099	8.67071
Central Madagascar	DA13-017-50	2468	20	0.000597		1.87	2.84	6.91	0.25	1.39426	1.09144	1.63979	50.7593	39.735	59.698
Central Madagascar	DA13-017-63	2518	20	0.001096		4.41	2.11	5.65	0.25	0.325482	0.229495	0.422565	11.8495	8.35499	15.3839
Central Madagascar	DA13-017-69	620	20	0.001068		1.86	3.07	6.11	0.25	0.353166	0.25048	0.455971	12.8574	9.11899	16.6001
Central Madagascar	DA13-017-70	541	20	0.00064		2.39	3.05	5.26	0.25	1.22998	0.954207	1.45895	44.7786	34.7388	53.1146
Central Madagascar	DA13-017-72	541	20	0.000822		7.9	3.17	6.05	0.25	0.723529	0.540303	0.889721	26.3408	19.6703	32.3912
Central Madagascar	DA13-017-75	823	17	0.000837		2.8	3.04	6.44	0.25	0.692569	0.515561	0.854184	25.2137	18.7695	31.0974
Central Madagascar	DA13-020-02	758	10	0.001891		3.56	2.82	6.12	0.28	0.0320572	0.0191347	0.0487164	1.16707	0.696619	1.77357
Central Madagascar	DA13-020-03	758	10	0.00075		6.14	2.6	2.98	0.28	0.892523	0.676634	1.08199	32.4932	24.6335	39.391
Central Madagascar	DA13-020-07	758	10	0.001137		3.44	2.71	5.12	0.28	0.288811	0.201897	0.378013	10.5145	7.35024	13.7619
Central Madagascar	DA13-020-10	758	10	0.001005		3.49	2.74	4.71	0.24	0.424373	0.304983	0.541111	15.4497	11.1032	19.6997
Central Madagascar	DA13-020-16	758	10	0.00095		2.95	2.71	4.58	0.25	0.49818	0.362176	0.62834	18.1368	13.1854	22.8753
Central Madagascar	DA13-020-20	758	10	0.000815		2.86	2.42	5.73	0.28	0.738446	0.552252	0.906807	26.8839	20.1053	33.0132
Central Madagascar	DA13-020-26	758	10	0.001104		2.96	2.71	5.19	0.24	0.317978	0.223829	0.413478	11.5763	8.1487	15.0531
Central Madagascar	DA13-020-31	758	10	0.000906		3.19	2.69	5.3	0.25	0.566367	0.415561	0.708143	20.6192	15.1289	25.7807
Central Madagascar	DA13-020-32	758	10	0.000961		2.76	2.53	2.96	0.25	0.482457	0.349938	0.609836	17.5643	12.7398	22.2017
Central Madagascar	DA13-020-35	758	10	0.001702		2.71	2.47	4.67	0.25	0.05562	0.0345404	0.0814185	2.0249	1.25748	2.96412
Central Madagascar	DA13-020-37	758	10	0.000983		3.77	2.71	6.02	0.31	0.452484	0.326688	0.574447	16.4731	11.8934	20.9133
Central Madagascar	DA13-020-40	758	10	0.00103		3.43	2.79	5.36	0.28	0.394542	0.282063	0.505572	14.3637	10.2688	18.4058
Central Madagascar	DA13-020-43	758	10	0.000991		3.19	2.67	6.22	0.3	0.442053	0.318622	0.562094	16.0934	11.5998	20.4636
Central Madagascar	DA13-020-44	758	10	0.000825		1.56	2.69	3.88	0.3	0.717228	0.535261	0.882497	26.1114	19.4867	32.1282
Central Madagascar	DA13-029-51	828	14	0.00161		4.07	2.11	7.2	0.17	0.0727307	0.0460455	0.104543	2.64784	1.67633	3.80601
Central Madagascar	DA13-029-52	828	14	0.001077		1.73	2.11	7.48	0.17	0.34402	0.243534	0.444955	12.5244	8.86609	16.199
Central Madagascar	DA13-029-53	828	14	0.000953		2.17	2.23	6.4	0.21	0.493842	0.358796	0.623238	17.9788	13.0623	22.6896
Central Madagascar	DA13-029-56	828	14	0.000756		1.35	2.16	6.93	0.14	0.877046	0.664065	1.06449	31.9298	24.176	38.754
Central Madagascar	DA13-029-58	828	14	0.001195		1.91	2.14	6.84	0.15	0.24388	0.168427	0.322893	8.8787	6.13177	11.7552
Central Madagascar	DA13-029-60	828	14	0.001248		2.17	2.06	7.03	0.19	0.208963	0.142719	0.279583	7.60751	5.19584	10.1785
Central Madagascar	DA13-049-22	827	16	0.001435		2.85	2.74	6.04	0.17	0.121143	0.0795595	0.168199	4.41032	2.89644	6.12345
Central Madagascar	DA13-049-24	827	16	0.001624		2.28	2.7	7.02	0.15	0.0698219	0.0440745	0.100641	2.54194	1.60457	3.66394
Central Madagascar	DA13-049-25	827	16	0.001265		1.88	2.65	7.03	0.18	0.198859	0.135335	0.266961	7.23965	4.92702	9.71899
Central Madagascar	DA13-049-27	827	16	0.001196		1.49	2.6	7.45	0.16	0.24317	0.167902	0.322017	8.85285	6.11264	11.7233
Central Madagascar	DA13-077-10	837	15	0.000513		3.89	2.12	4.23	0.28	1.78115	1.41907	2.06025	64.8446	51.6626	75.0054
Central Madagascar	DA13-077-36	527	9	0.000543		2.6	2.32	2.81	0.29	1.63198	1.29208	1.89896	59.414	47.0393	69.1334
Central Madagascar	DA13-077-39	837	15	0.000534		1.46	2.25	4.35	0.29	1.67537	1.32893	1.94597	60.9936	48.3811	70.845
Central Madagascar	DA13-077-43	837	15	0.000684		1.83	2.15	4.2	0.3	1.0819	0.831624	1.29454	39.3876	30.2761	47.1289
Central Madagascar	DA13-077-44	837	15	0.000732		8.47	2.06	4.1	0.3	0.940612	0.715785	1.13623	34.2439	26.0589	41.3657
Central Madagascar	DA13-077-47	837	15	0.000839		3.59	2.02	3.23	0.3	0.688543	0.512349	0.849554	25.0671	18.6526	30.9289
Central Madagascar	DA13-077-60	837	15	0.000727		4.72	2.06	4.64	0.29	0.954424	0.727057	1.15178	34.7468	26.4692	41.9315
Central Madagascar	DA13-083-48	795	12	0.00132		2.99	2.97	6.19	0.29	0.169397	0.113964	0.2299	6.16707	4.14896	8.36976
Central Madagascar	DA13-083-49	795	12	0.001636		3.18	2.96	6.43	0.29	0.0674214	0.0424523	0.0974121	2.45454	1.54552	3.54639
Central Madagascar	DA13-083-51	795	12	0.001431		2.33	2.96	6.22	0.31	0.122564	0.0805602	0.170037	4.46205	2.93288	6.19037
Central Madagascar	DA13-083-52	795	12	0.00177		3.11	2.94	5.94	0.29	0.0456175	0.027928	0.067682	1.66075	1.01675	2.46403
Central Madagascar	DA13-083-53	795	12	0.000881		1.82	2.9	5.36	0.3	0.609189	0.449329	0.757923	22.1781	16.3583	27.5929
Central Madagascar	DA13-083-54	677	11	0.001378		3.54	3.03	5.63	0.32	0.143044	0.0950716	0.196377	5.20764	3.46118	7.14931
Central Madagascar	DA13-083-55	795	12	0.001329		3.04	2.99	5.86	0.29	0.16501	0.110803	0.224346	6.00735	4.0339	8.16754
Central Madagascar	DA13-083-56	795	12	0.001229		1.95	2.93	6.28	0.3	0.220865	0.15145	0.294397	8.04081	5.51369	10.7178
Central Madagascar	DA13-083-57	795	12	0.001948		2.7	2.9	6.12	0.31	0.027149	0.0160127	0.041726	0.988388	0.582957	1.51908
Central Madagascar	DA13-083-59	795	12	0.00146		3.99	2.87	6.15	0.29	0.112627	0.0735805	0.157152	4.1003	2.67877	5.72127
Central Madagascar	DA13-083-62	677	11	0.001486		2.15	2.84	5.38	0.35	0.104405	0.0678385	0.146432	3.80098	2.46973	5.331
Central Madagascar	DA13-083-63	547	12	0.000779		2.34	2.93	5.62	0.3	0.820164	0.61801	1	29.8589	22.4993	36.406
Central Madagascar	DA13-083-66	795	12	0.001293		2.35	3.05	6.75	0.29	0.18327	0.123997	0.247402	6.67214	4.51423	9.00693
Central Madagascar	DA13-083-68	795	12	0.001067		1.71	2.88	6.5	0.29	0.354197	0.251264	0.457212	12.8949	9.14753	16.6453
Central Madagascar	DA13-083-69	677	11	0.001074		1.92	2.89	6.29	0.31	0.347042	0.245828	0.448597	12.6344	8.9496	16.3316
Central Madagascar	DA13-083-70	677	11	0.001503		2.21	2.9	6.05	0.29	0.0993568	0.0643287	0.139821	3.61718	2.34195	5.09033
Central Madagascar	DA13-083-72	795	12	0.001648		2.78	2.87	5.42	0.32	0.0651034	0.0408898	0.0942869	2.37015	1.48863	3.43261
Central Madagascar	DA13-083-73	795	12	0.002215		3.45	2.92	6.34	0.34	0.0124649	0.00695183	0.020198	0.453797	0.253088	0.735327
Central Madagascar	BGS-TK64A-06	764	16	0.001831		1.83	2.69	3.98	0.17	0.0381852	0.0230809	0.0573435	1.39017	0.840283	2.08765
Central Madagascar	BGS-TK64A-07	764	16	0.000954		1.71	2.64	5.4	0.16	0.492404	0.357677	0.621547	17.9265	13.0216	22.628
Central Madagascar	BGS-TK64A-12	764	16	0.00162		2.09	2.7	5.55	0.17	0.0706409	0.0446288	0.101741	2.57175	1.62476	3.70398
Central Madagascar	BGS-TK64A-13	764	16	0.000559		1.53	2.75	5.05	0.16	1.5576	1.22906	1.81816	56.7061	44.7452	66.192
Central Madagascar	BGS-TK64A-14	764	16	0.001224		2.32	2.64	6.04	0.15	0.224108	0.153835	0.298424	8.15888	5.60052	10.8644
Central Madagascar	BGS-TK64A-16	764	16	0.000587		1.57	2.65	5.75	0.17	1.4355	1.12609	1.68496	52.261	40.9964	61.3425
Central Madagascar	BGS-TK64A-18	764	16	0.001038		1.62	2.72	4.99	0.15	0.385447	0.275099	0.4947	14.0326	10.0152	18.01
Central Madagascar	BGS-WB005-01	793	11	0.001081		2.46	2.4	3.66	0.14	0.340031	0.240508	0.440145	12.3792	8.75595	16.0239
Central Madagascar	BGS-WB005-04	793	11	0.001532		3.42	2.42	4.04	0.17	0.0913017	0.0587552	0.129226	3.32393	2.13904	4.70459
Central Madagascar	BGS-WB005-08	793	11	0.001761		3.26	2.26	3.65	0.28	0.0468303	0.0287246	0.0693577	1.7049	1.04575	2.52504
Central Madagascar	BGS-WB005-09	793	11	0.00089		3.1	2.51	4.11	0.22	0.593412	0.436868	0.739611	21.6038	15.9046	26.9263
Central Madagascar	BGS-WB005-13	793	11	0.002816		5.08	2.28	2.75	0.23	0.00216134	0.00106277	0.00394492	0.0786858	0.0386913	0.143619
Central Madagascar	BGS-WB005-14	793	11	0.001622		3.25	2.29	3.64	0.21	0.0702302	0.0443508	0.101189	2.5568	1.61463	3.6839
Central Madagascar	BGS-WB1451-04	774	16	0.001482		2.87	2.59	3.9	0.14	0.10563	0.0686918	0.148032	3.84556	2.50079	5.38926
Central Madagascar	BGS-WB1451-11	774	16	0.00177		4.67	2.83	4.58	0.14	0.0456175	0.027928	0.067682	1.66075	1.01675	2.46403
Central Madagascar	BGS-WB1451-13	774	16	0.001833		3.79	2.58	3.95	0.17	0.0379632	0.0229371	0.0570327	1.38209	0.835048	2.07633
Central Madagascar	BGS-WB1451-17	774	16	0.002779		5.53	2.57	1.69	0.13	0.00240753	0.00119304	0.00436218	0.0876485	0.0434338	0.15881
Central Madagascar	BGS-WB1451-18	774	16	0.001418		2.04	2.44	3.87	0.15	0.127298	0.0839004	0.176151	4.63441	3.05448	6.41296
Central Madagascar	BGS-PP156-03r	819	23	0.001746		4.23	2.79	8	0.35	0.0489237	0.0301032	0.0722432	1.78112	1.09594	2.63009
Central Madagascar	BGS-PP156-04r	819	23	0.0018		5	2.36	8.92	0.34	0.0417972	0.0254287	0.0623834	1.52167	0.925759	2.27113
Central Madagascar	BGS-PP156-06r	819	23	0.001266		3.01	2.37	6.18	0.33	0.19828	0.134913	0.266237	7.21858	4.91164	9.69261
Central Madagascar	BGS-PP156-12	819	23	0.002651		3.02	2.32	9.43	0.36	0.00349656	0.00177981	0.00617679	0.127296	0.0647957	0.224872
Central Madagascar	BGS-PP156-14c	2459	20	0.000534		1.7	2.72	4.32	0.35	1.67537	1.32893	1.94597	60.9936	48.3811	70.845
Central Madagascar	BGS-PP156-18r	819	23	0.001219		2.48	2.28	7.71	0.34	0.227399	0.156257	0.302507	8.27868	5.68871	11.0131
Central Madagascar	BGS-RT07-32-09	768	8	0.002286		3.05	2.85	6.39	0.38	0.0101342	0.00556853	0.0166539	0.368947	0.202728	0.606303
Central Madagascar	DA13-074-41	821	11	0.000321		1.28	2.59	9.79	0.31	3.11748	2.58571	3.47143	113.495	94.1353	126.381
Central Madagascar	DA13-074-43	821	11	0.000406		1.24	2.56	9.46	0.29	2.43321	1.98253	2.75547	88.5836	72.1761	100.316
Central Madagascar	DA13-074-45	821	11	0.000825		1.86	2.62	9.67	0.29	0.717228	0.535261	0.882497	26.1114	19.4867	32.1282
Central Madagascar	DA13-074-47	821	11	0.000412		1.44	2.55	9.71	0.35	2.39102	1.94571	2.71091	87.0475	70.8354	98.6932
Central Madagascar	DA13-074-48	821	11	0.000431		1.4	2.48	9.54	0.29	2.26217	1.83354	2.57449	82.3567	66.752	93.7269
Central Madagascar	DA13-074-52	821	11	0.000654		1.61	2.68	9.67	0.28	1.18079	0.91336	1.40449	42.9877	33.2518	51.1318
Central Madagascar	DA13-074-53	821	11	0.000382		1.93	2.56	10.22	0.31	2.60957	2.13694	2.94116	95.0038	77.7974	107.076
Central Madagascar	DA13-074-54	657	11	0.000445		1.39	2.59	10.88	0.29	2.1717	1.75505	2.47839	79.0629	63.8945	90.2282
Central Madagascar	DA13-074-55	821	11	0.000488		1.17	2.54	9.84	0.28	1.91582	1.53438	2.20507	69.7473	55.8606	80.2779
Central Madagascar	DA13-074-56	821	11	0.000655		1.89	2.65	9.65	0.36	1.17735	0.91051	1.40068	42.8626	33.148	50.9931
Central Madagascar	DA13-074-62	821	11	0.000447		2.75	2.62	9.65	0.31	2.15907	1.74412	2.46496	78.6032	63.4964	89.7392
Central Madagascar	DA13-074-63	821	11	0.000593		1.35	2.6	10.06	0.31	1.41061	1.10517	1.65771	51.3547	40.2349	60.3504
Central Madagascar	DA13-074-65	821	11	0.000553		1.76	2.68	10.24	0.29	1.58509	1.25232	1.84805	57.7068	45.5921	67.2801
Central Madagascar	DA13-074-69	821	11	0.000328		1.11	2.56	9.41	0.29	3.05451	2.52976	3.40602	111.202	92.0985	123.999
Central Madagascar	DA13-076-46	813	10	0.000478		1.33	2.49	9.64	0.31	1.9725	1.58308	2.26582	71.8107	57.6338	82.4893
Central Madagascar	DA13-076-47	813	10	0.000367		0.79	2.44	9.18	0.35	2.72622	2.23949	3.06352	99.2507	81.531	111.531
Central Madagascar	DA13-076-48	813	10	0.000428		1.18	2.54	9.17	0.29	2.28205	1.85081	2.59557	83.0802	67.3807	94.4942
Central Madagascar	DA13-076-49	813	10	0.000451		2.18	2.47	9.18	0.36	2.13404	1.72245	2.43831	77.6919	62.7077	88.769
Central Madagascar	DA13-076-50	813	10	0.001292		1.71	2.59	9.49	0.4	0.183805	0.124385	0.248076	6.69162	4.52835	9.03144
Central Madagascar	DA13-076-51	813	10	0.000671		1.53	2.59	9.35	0.29	1.12369	0.866104	1.34108	40.9091	31.5314	48.8235
Central Madagascar	DA13-076-52	813	10	0.000507		1.29	2.54	9.56	0.3	1.81258	1.44593	2.09411	65.9888	52.6404	76.2383
Central Madagascar	DA13-076-53	813	10	0.000535		1.28	2.46	8.4	0.29	1.67049	1.32478	1.94069	60.816	48.2301	70.6528
Central Madagascar	DA13-076-55	813	10	0.000668		1.57	2.5	8.67	0.29	1.13356	0.874262	1.35206	41.2684	31.8284	49.2231
Central Madagascar	DA13-076-56	813	10	0.000511		2.16	2.5	8.76	0.3	1.79157	1.42796	2.07147	65.2238	51.9865	75.4141
Central Madagascar	DA13-076-58	813	10	0.000735		2.86	2.52	9.45	0.3	0.932421	0.709106	1.12701	33.9457	25.8157	41.0298
Central Madagascar	DA13-076-59	813	10	0.001174		2.47	2.52	8.94	0.28	0.259278	0.179851	0.341855	9.43928	6.54767	12.4456
Central Madagascar	DA13-076-60	813	10	0.000709		2.42	2.56	8.57	0.29	1.00585	0.769126	1.20951	36.6189	28.0008	44.0335
Central Madagascar	DA13-076-61	813	10	0.000811		1.8	2.54	9.43	0.31	0.747108	0.559199	0.916717	27.1992	20.3582	33.374
Central Madagascar	DA13-076-62	813	10	0.00036		1.21	2.54	9.42	0.29	2.78243	2.28902	3.12235	101.297	83.3342	113.672
Central Madagascar	BGS-WB37-04	842	15	0.001626		4.42	3.3	4.2	0.14	0.069416	0.0437998	0.100096	2.52716	1.59458	3.64408
Central Madagascar	BGS-WB37-06	842	15	0.001565		3.2	3.01	5.61	0.21	0.0829269	0.0529981	0.118142	3.01904	1.92945	4.30107
Central Madagascar	BGS-WB37-07	842	15	0.00117		2.69	2.89	5.8	0.2	0.262319	0.182114	0.345591	9.55	6.63003	12.5816
Central Madagascar	BGS-WB37-08	842	15	0.001567		3.24	3.09	5.68	0.14	0.0824448	0.0526679	0.117501	3.00148	1.91743	4.27776
Central Madagascar	BGS-WB37-09	842	15	0.00329		3.41	3.02	6.69	0.32	0.000542702	0.000241625	0.00108805	0.0197576	0.00879659	0.0396115
Central Madagascar	BGS-RK395-05	814	30	0.00151		2.75	3.07	6.07	0.16	0.0973497	0.0629368	0.137187	3.54411	2.29128	4.99442
Central Madagascar	BGS-RK395-06	814	30	0.001176		2.14	3.04	7.06	0.44	0.257771	0.178731	0.340002	9.3844	6.50687	12.3781
Central Madagascar	BGS-RK395-08	814	30	0.001784		3.54	3.06	5.76	0.15	0.0437931	0.0267325	0.0651555	1.59433	0.973224	2.37205
Central Madagascar	BGS-RK395-16	814	30	0.001233		2.83	3.12	6.29	0.15	0.218304	0.149569	0.291214	7.94758	5.4452	10.6019
Central Madagascar	BGS-RK395-17	814	30	0.001309		3.11	3.12	7.1	0.18	0.174918	0.117949	0.236876	6.36805	4.29406	8.62372
Central Madagascar	BGS-RK395-20	814	30	0.001263		3.34	3.29	4.23	0.16	0.200022	0.136184	0.268416	7.28199	4.95791	9.77195
Central Madagascar	BGS-RK395-21	814	30	0.001019		2.21	3.14	6.24	0.14	0.4074	0.291927	0.520912	14.8318	10.6279	18.9643
Arabian–Nubian Shield	04-02	735	11.7	0.00159644		7.98238	1.22809	7.89741	0.306935	0.0756646	0.0480393	0.108469	2.75464	1.74892	3.94891
Arabian–Nubian Shield	04-13	769	12.7	0.00206827		5.80395	1.03156	8.23094	0.48358	0.0191193	0.010996	0.0300933	0.696058	0.400322	1.09558
Arabian–Nubian Shield	04-12	789	13.58	0.00142103		6.18243	1.0413	6.56053	0.322251	0.12618	0.0831109	0.174709	4.59371	3.02573	6.36045
Arabian–Nubian Shield	04-20	740	12.34	0.00271173		6.00115	1.1892	7.87945	0.295922	0.00292919	0.00147215	0.00523713	0.10664	0.0535952	0.190663
Arabian–Nubian Shield	04-27	697	12.98	0.00221648		6.88974	1.08091	7.83361	0.43652	0.0124112	0.00691973	0.0201168	0.451842	0.25192	0.732373
Arabian–Nubian Shield	04-01	750	11.48	0.00106737		6.28359	0.785968	9.5208	0.285998	0.353818	0.250976	0.456755	12.8811	9.13702	16.6286
Arabian–Nubian Shield	04-07	734	11.67	0.0015471		6.22358	0.900287	7.8917	0.407138	0.0873702	0.0560476	0.124031	3.1808	2.04047	4.51549
Arabian–Nubian Shield	08-04	781	11.79	0.00164848		7.3374	0.967022	8.65067	0.334434	0.0650127	0.0408287	0.0941645	2.36685	1.48641	3.42815
Arabian–Nubian Shield	08-08	743	11.69	0.00276154		7.49256	1.23605	8.69872	0.352611	0.00253325	0.00125994	0.00457413	0.0922254	0.0458694	0.166526
Arabian–Nubian Shield	08-12	735	11.67	0.0017481		8.80146	1.25863	8.70372	0.311913	0.0486255	0.0299065	0.0718326	1.77026	1.08878	2.61514
Arabian–Nubian Shield	08-13	721	13.82	0.00211232		8.4767	1.11598	5.92898	0.300754	0.0168149	0.00958183	0.0266981	0.612162	0.348836	0.971971
Arabian–Nubian Shield	08-18	749	11.09	0.0025899		7.74431	1.20646	7.90253	0.337621	0.00417834	0.00215425	0.0072924	0.152117	0.0784278	0.265487
Arabian–Nubian Shield	08-20	765	12.46	0.00223264		7.4522	1.66907	8.48018	0.367643	0.0118399	0.00657892	0.0192525	0.431045	0.239512	0.700905
Arabian–Nubian Shield	08-25	736	22.55	0.00219866		6.10835	1.16934	8.4377	0.300742	0.0130732	0.00731609	0.0211151	0.475942	0.266349	0.768718
Arabian–Nubian Shield	08-27	760	13.43	0.00159607		9.73569	1.22293	7.15992	0.362673	0.0757461	0.0480947	0.108578	2.75761	1.75094	3.95288
Arabian–Nubian Shield	19-30	864	11.9	0.00254542		11.1782	1.21627	5.29727	0.380057	0.00475682	0.00247547	0.0082292	0.173177	0.0901219	0.299592
Arabian–Nubian Shield	19-33	855	11.88	0.00096663		10.9905	0.83384	3.97636	0.418834	0.474603	0.343835	0.600578	17.2784	12.5177	21.8646
Arabian–Nubian Shield	19-34	901	12.46	0.000673685		11.7474	0.679407	1.74937	0.304681	1.11493	0.858868	1.33134	40.5901	31.2679	48.4686
Arabian–Nubian Shield	19-36	838	11.73	0.00142508		10.2051	0.85325	5.15346	0.288107	0.124696	0.0820637	0.172793	4.53969	2.98761	6.2907
Arabian–Nubian Shield	19-39	838	11.7	0.00188614		11.525	1.05212	5.83256	0.335613	0.0325148	0.0194277	0.0493643	1.18373	0.707283	1.79716
Arabian–Nubian Shield	19-56	837	11.82	0.0014503		10.161	0.81191	6.0082	0.359655	0.115856	0.0758442	0.161347	4.21786	2.76118	5.87402
Arabian–Nubian Shield	19-57	818	11.48	0.00158487		10.6981	0.857699	1.94188	0.423024	0.0782587	0.0498068	0.111931	2.84909	1.81327	4.07496
Arabian–Nubian Shield	19-63	819	11.67	0.00159741		10.3735	1.00729	4.63553	1.37332	0.0754499	0.0478932	0.108182	2.74683	1.7436	3.93847
Arabian–Nubian Shield	25-04	847	11.87	0.00114802		9.29716	0.647318	5.67558	0.34069	0.279681	0.195063	0.366863	10.1821	7.10147	13.356
Arabian–Nubian Shield	25-13	842.3	12.61	0.000982461		9.87891	0.982875	5.61787	0.288924	0.453195	0.327238	0.575288	16.499	11.9134	20.944
Arabian–Nubian Shield	25-16	904.4	12.3	0.00138864		11.3677	1.01608	4.89418	0.394574	0.138675	0.0919629	0.190782	5.0486	3.348	6.94559
Arabian–Nubian Shield	25-17	833.3	12.07	0.0014449				4.03525	0.34907	0.117697	0.0771367	0.163736	4.28489	2.80824	5.96097
Arabian–Nubian Shield	25-20	835.1	12.01	0.0014449				5.77393	0.282407	0.117697	0.0771367	0.163736	4.28489	2.80824	5.96097
Arabian–Nubian Shield	MR-01-01	837	10.99	0.000460775		9.52722	0.917275	3.85332	0.429877	2.07409	1.67064	2.3744	75.5091	60.8212	86.4423
Arabian–Nubian Shield	MR-01-02	825.8	10.93	0.00137318		8.43095	0.981422	4.65812	0.472187	0.145069	0.0965152	0.198968	5.28137	3.51373	7.24361
Arabian–Nubian Shield	MR-01-03	817.9	11.17	0.000829474		9.35603	0.981422	6.05784	0.407432	0.707933	0.52783	0.871833	25.773	19.2162	31.7399
Arabian–Nubian Shield	MR-01-07	816.7	10.82	0.000495602		9.43559	0.77635	2.33529	0.660114	1.87383	1.49836	2.15999	68.2186	54.5492	78.6367
Arabian–Nubian Shield	MR-01-12	802.5	10.32	0.00191381		8.37629	0.781024	2.358	0.462844	0.0299951	0.0178185	0.045789	1.092	0.6487	1.66699
Arabian–Nubian Shield	MR-01-13	832.2	19.37	0.000675632		9.5089	0.621927	2.69048	0.610815	1.10862	0.853656	1.32431	40.3603	31.0782	48.2128
Arabian–Nubian Shield	MR-01-18	808.8	10.57	0.000657602		7.86674	0.646469	2.39599	0.449267	1.16845	0.903136	1.39081	42.5386	32.8796	50.6338
Arabian–Nubian Shield	MR-01-25	804.5	10.54	0.000516664		8.07633	0.766736	2.34607	0.508539	1.76223	1.40291	2.03984	64.1556	51.0744	74.2623
Arabian–Nubian Shield	MR-02-11	766.6	10.08	0.000466655		9.90092	0.905736	3.53772	0.417544	2.03883	1.64021	2.33675	74.2256	59.7137	85.0719
Arabian–Nubian Shield	MR-02-16	760.8	10.23	0.00138247		9.28135	0.657475	2.45955	0.409019	0.141193	0.0937537	0.194008	5.14026	3.4132	7.06306
Arabian–Nubian Shield	MR-02-24	808.6	10.76	0.000804252		9.9095	0.661161	4.45151	0.506106	0.761951	0.571116	0.933681	27.7396	20.792	33.9916
Arabian–Nubian Shield	MR-02-28	776.2	11.22	0.000942535		9.82001	0.854558	4.98772	0.468278	0.509142	0.370725	0.641217	18.5358	13.4966	23.3441
Arabian–Nubian Shield	MR-02-30	774.7	14.27	0.000776382		10.3941	0.862647	2.42709	0.421024	0.826448	0.623087	1.00714	30.0877	22.6841	36.6659
Arabian–Nubian Shield	MR-02-35	762.3	11.82	0.000613593		10.0377	0.75012	2.00814	0.449146	1.32841	1.03629	1.56749	48.3623	37.7272	57.0661
Arabian–Nubian Shield	MR-02-38	756.3	11.85	0.000748586		10.1569	0.937111	3.81504	0.426909	0.89621	0.67963	1.08616	32.6274	24.7426	39.5426
Arabian–Nubian Shield	MR-04-03	763.4	9.22	0.000854497		10.7847	0.680501	4.77161	0.408676	0.658126	0.488128	0.814521	23.9597	17.7708	29.6535
Arabian–Nubian Shield	MR-04-06	830.7	9.18	0.0010735		8.65207	0.85644	6.23451	0.436253	0.347553	0.246215	0.449212	12.653	8.96371	16.354
Arabian–Nubian Shield	MR-04-18	777.5	10.69	0.00164321		9.65608	0.858616	3.85921	0.420148	0.0660193	0.0415067	0.0955227	2.4035	1.51109	3.4776
Arabian–Nubian Shield	MR-04-28	788.8	14.64	0.00118953		10.4806	0.911098	4.31482	0.416172	0.2478	0.171331	0.327727	9.0214	6.23747	11.9312
Arabian–Nubian Shield	MR-05-05	765	9.26	0.000316356		8.94273	0.985393	4.57843	0.46639	3.15998	2.62351	3.51551	115.042	95.5114	127.986
Arabian–Nubian Shield	MR-05-06	763.5	9.93	0.00040976		9.15912	0.65134	5.67655	0.416374	2.40669	1.95937	2.72746	87.6178	71.333	99.2958
Arabian–Nubian Shield	MR-05-07	769.7	9.42	0.000308676		8.88873	0.666633	4.7431	0.410007	3.23153	2.68723	3.58964	117.647	97.8313	130.685
Arabian–Nubian Shield	MR-05-08	771.6	9.48	0.000325351		8.67016	0.548224	3.98417	0.409822	3.07819	2.55079	3.43062	112.064	92.864	124.895
Arabian–Nubian Shield	MR-05-11	770.9	9.84	0.000259478		9.13972	0.574818	5.34991	0.423297	3.72994	3.13384	4.10311	135.792	114.09	149.378
Arabian–Nubian Shield	MR-05-12	751.5	11.97	0.000193349		9.21888	0.703163	6.03531	0.532626	4.52305	3.85322	4.91083	164.666	140.28	178.784
Arabian–Nubian Shield	MR-05-14	758.7	10.85	0.000610705		8.22266	0.729023	5.06265	0.416857	1.33965	1.04569	1.57984	48.7712	38.0692	57.5157
Arabian–Nubian Shield	MR-05-17	761.7	9.15	0.000487936		9.27716	0.637071	4.14562	0.409839	1.91618	1.53468	2.20546	69.7603	55.8717	80.2919
Arabian–Nubian Shield	MR-05-18	765.4	8.82	0.00234161		8.08289	0.745895	4.86444	0.46412	0.0086175	0.00468026	0.0143183	0.313729	0.17039	0.521271
Arabian–Nubian Shield	MR-07-05	858.3	9.54	0.00193853		11.5585	1.14026	4.33823	0.427585	0.027909	0.0164936	0.0428137	1.01606	0.600467	1.55868
Arabian–Nubian Shield	MR-07-06	854.8	9.49	0.000817275		12.0037	0.768683	3.90122	0.455826	0.733565	0.548341	0.901219	26.7062	19.9629	32.8098
Arabian–Nubian Shield	MR-07-11	833.2	9.69	0.00115399		11.0703	0.757658	3.43798	0.430468	0.274853	0.191456	0.360956	10.0063	6.97014	13.141
Arabian–Nubian Shield	MR-07-12	831.1	9.44	0.000876978		11.4115	1.2446	5.8878	0.485013	0.616374	0.455012	0.766252	22.4397	16.5652	27.8962
Arabian–Nubian Shield	MR-07-16	816.1	8.9	0.00117541		10.6812	1.06178	4.96363	0.52174	0.258216	0.179062	0.34055	9.40062	6.51893	12.398
Arabian–Nubian Shield	MR-07-18	813.2	8.98	0.00153309		10.5206	0.650367	2.71196	0.405783	0.0910113	0.0585549	0.128842	3.31336	2.13175	4.69064
Arabian–Nubian Shield	MR-07-19	812.7	9.14	0.00187002		10.0887	0.85627	3.71483	0.406578	0.0340791	0.0204312	0.0515743	1.24068	0.743819	1.87761
Arabian–Nubian Shield	MR-07-22	843	8.98	0.000709511		10.8874	0.733926	2.35221	0.402577	1.00435	0.767899	1.20783	36.5644	27.9561	43.9724
Arabian–Nubian Shield	MR-07-23	997	11	0.0010464		15.1892	0.77931	2.54226	0.402093	0.376125	0.267974	0.48354	13.6932	9.75586	17.6037
Arabian–Nubian Shield	MR-07-24	805.8	10.84	0.000676336		11.4567	0.874243	4.20223	0.409197	1.10634	0.851782	1.32178	40.2776	31.01	48.1207
Arabian–Nubian Shield	MR-07-32	795.4	8.47	0.00107912		10.6884	1.09225	2.84014	0.415373	0.341904	0.241928	0.442403	12.4474	8.80765	16.1061
Arabian–Nubian Shield	MR-07-36	786	8.56	0.00107824		12.6587	0.78688	3.75798	0.441496	0.342782	0.242594	0.443462	12.4793	8.83189	16.1447
Arabian–Nubian Shield	S02-5 - 27	753	43	0.003109	760	14	1.32	4.95	0.22	0.000919893	0.000425392	0.00177932	0.0334896	0.0154868	0.0647781
Arabian–Nubian Shield	S02-5 - 28	678	28	0.002293	1050	8.55	1.04	4.86	0.18	0.0099295	0.00544804	0.0163401	0.361493	0.198341	0.594879
Arabian–Nubian Shield	S02-5 - 29	724	26	0.00258	930	11.08	0.92	4.94	0.15	0.00430069	0.00222194	0.00749123	0.156571	0.0808919	0.272726
Arabian–Nubian Shield	S02-5 - 30	701	23	0.00257	810	12.66	0.86	4.92	0.21	0.00442792	0.00229247	0.00769759	0.161203	0.0834597	0.280239
Arabian–Nubian Shield	S02-5 - 31	696	24	0.00378	860	11.74	1.14	4.5	0.18	0.000130059	5.2255e-05	0.000287327	0.00473493	0.0019024	0.0104604
Arabian–Nubian Shield	S02-5 - 32	755	59	0.002334	1190	7.38	0.42	4.81	0.23	0.00881079	0.00479287	0.0146174	0.320766	0.174489	0.532161
Arabian–Nubian Shield	S02-5 - 33	670	20	0.002888	1010	9.04	0.86	4.83	0.19	0.0017521	0.00084864	0.0032439	0.063787	0.0308956	0.118098
Arabian–Nubian Shield	S02-5 - 34	715	19	0.002191	1030	9.34	0.71	4.97	0.26	0.0133683	0.00749327	0.0215591	0.486686	0.2728	0.784881
Arabian–Nubian Shield	S02-5 - 35	697	24	0.002247	1030	9.18	0.66	5	0.18	0.0113546	0.00629028	0.0185158	0.413375	0.229004	0.674086
Arabian–Nubian Shield	S02-5 - 36	719	30	0.002966	850	12.13	1.08	4.95	0.22	0.00139572	0.000665066	0.00262432	0.0508126	0.0242124	0.0955409
Arabian–Nubian Shield	S02-5 - 37	714	22	0.00253	790	13.12	0.69	4.79	0.2	0.00497561	0.00259771	0.00858145	0.181142	0.0945722	0.312416
Arabian–Nubian Shield	S02-5 - 38	729	23	0.002565	820	12.82	0.81	4.87	0.26	0.00449294	0.00232857	0.00780289	0.16357	0.084774	0.284072
Arabian–Nubian Shield	S02-5 - 39	696	26	0.00477	700	14.23	1.65	4.93	0.17	7.255e-06	2.3688e-06	1.94998e-05	0.000264126	8.62387e-05	0.000709908
Arabian–Nubian Shield	S02-5 - 40	690	19	0.002042	990	9.73	0.44	5.15	0.21	0.0206412	0.0119369	0.0323201	0.751463	0.434573	1.17665
Arabian–Nubian Shield	S02-5 - 41	706	18	0.00349	730	13.92	0.98	4.95	0.18	0.00030292	0.000129332	0.000631857	0.0110281	0.00470847	0.0230034
Arabian–Nubian Shield	S02-5 - 42	699	21	0.002334	870	11.59	0.62	4.93	0.22	0.00881079	0.00479287	0.0146174	0.320766	0.174489	0.532161
Arabian–Nubian Shield	S02-5 - 43	710	23	0.002155	990	9.85	0.57	4.67	0.16	0.0148477	0.00838551	0.0237748	0.540544	0.305283	0.865544
Arabian–Nubian Shield	S02-5 - 44	688	21	0.001913	970	9.89	0.63	5.06	0.21	0.0300656	0.0178634	0.0458894	1.09457	0.650336	1.67065
Arabian–Nubian Shield	S02-5 - 45	749	27	0.00256	900	11.78	0.93	4.82	0.28	0.00455892	0.00236524	0.00790963	0.165972	0.086109	0.287958
Arabian–Nubian Shield	S02-5 - 46	739	22	0.002181	880	11.9	0.56	4.96	0.19	0.0137638	0.00773113	0.022153	0.501084	0.28146	0.806502
Arabian–Nubian Shield	S02-5 - 47	698	32	0.002768	780	13.03	0.9	5.05	0.13	0.00248599	0.00123476	0.00449454	0.0905049	0.0449528	0.163628
Arabian–Nubian Shield	S02-5 - 48	706	23	0.002316	960	10.36	0.71	5.05	0.18	0.00928551	0.0050702	0.0153501	0.338048	0.184586	0.558837
Arabian–Nubian Shield	S02-5 - 49	688	16	0.003446	1000	9.54	0.78	5.2	0.24	0.000344381	0.000148396	0.000712107	0.0125375	0.00540251	0.025925
Arabian–Nubian Shield	S02-5 - 50	697	22	0.002571	870	11.55	0.74	5.01	0.24	0.00441503	0.00228532	0.0076767	0.160734	0.0831993	0.279478
Arabian–Nubian Shield	S02-5 - 51	703	22	0.002234	970	10.06	0.75	5.24	0.18	0.0117932	0.00655108	0.0191816	0.429343	0.238499	0.698325
Arabian–Nubian Shield	S02-5 - 52	686	25	0.002155	850	11.72	0.71	4.93	0.18	0.0148477	0.00838551	0.0237748	0.540544	0.305283	0.865544
Arabian–Nubian Shield	S02-5 - 53	718	30	0.00229	840	12.4	0.99	5.02	0.19	0.0100167	0.00549935	0.0164739	0.364669	0.200209	0.599749
Arabian–Nubian Shield	S16 - 9	707.3	9.8	0.000752	900	11.34	0.78	4.27	0.16	0.887334	0.672418	1.07613	32.3043	24.4801	39.1775
Arabian–Nubian Shield	S16 - 12	732	18	0.000749	870	11.96	0.81	5.12	0.18	0.895129	0.678752	1.08494	32.5881	24.7106	39.4982
Arabian–Nubian Shield	S16 - 13	712	12	0.00102	990	9.9	0.65	4.65	0.13	0.406214	0.291017	0.519499	14.7886	10.5947	18.9129
Arabian–Nubian Shield	S16 - 14	724.7	8.7	0.001709	870	11.9	0.68	4.85	0.2	0.0544964	0.0337931	0.0798845	1.984	1.23027	2.90827
Arabian–Nubian Shield	S16 - 15	705	12	0.000681	1000	9.69	0.39	4.77	0.28	1.0914	0.839457	1.30513	39.7336	30.5613	47.5146
Arabian–Nubian Shield	S16 - 16	712	11	0.001025	920	11.03	0.65	4.83	0.18	0.400336	0.286505	0.512488	14.5746	10.4305	18.6576
Arabian–Nubian Shield	S16 - 17	688.7	9.5	0.000926	930	10.5	0.65	4.9	0.23	0.534287	0.390384	0.670684	19.4513	14.2123	24.4169
Arabian–Nubian Shield	S16 - 18	717	10	0.0010209	970	10.26	0.74	4.91	0.19	0.40515	0.290199	0.51823	14.7499	10.565	18.8667
Arabian–Nubian Shield	S16 - 19	702	17	0.0004197	970	10.17	0.48	5.2	0.21	2.33794	1.89945	2.65477	85.1151	69.1512	96.6496
Arabian–Nubian Shield	S16 - 20	698	19	0.0005545	1050	8.78	0.62	5.23	0.16	1.57817	1.24647	1.84053	57.455	45.3788	67.0064
Arabian–Nubian Shield	S16 - 21	688	12	0.000814	850	11.88	0.71	4.69	0.26	0.740602	0.553981	0.909274	26.9624	20.1682	33.103
Arabian–Nubian Shield	S16 - 22	696	14	0.0010275	1010	9.41	0.53	4.7	0.26	0.397428	0.284275	0.509018	14.4688	10.3493	18.5313
Arabian–Nubian Shield	S16 - 23	700.4	7.6	0.000833	1100	8.14	0.65	4.57	0.18	0.700693	0.522046	0.863519	25.5094	19.0056	31.4373
Arabian–Nubian Shield	S16 - 24	730.1	9.2	0.000939	950	10.76	0.6	4.52	0.17	0.514416	0.374842	0.647405	18.7278	13.6465	23.5694
Arabian–Nubian Shield	S16 - 25	704	14	0.0006312	1130	7.61	0.74	4.33	0.26	1.26194	0.980811	1.49426	45.9423	35.7074	54.4
Arabian–Nubian Shield	S16 - 26	704	16	0.000836	990	9.81	0.59	5.02	0.23	0.694591	0.517174	0.856508	25.2873	18.8283	31.182
Arabian–Nubian Shield	S16 - 27	718	24	0.0019855	1020	9.53	0.95	4.73	0.22	0.0243373	0.014242	0.0376835	0.886025	0.518493	1.37191
Arabian–Nubian Shield	S16 - 28	739	13	0.000564	960	10.75	0.6	4.82	0.23	1.53506	1.21001	1.79363	55.8855	44.0515	65.2987
Arabian–Nubian Shield	S16 - 29	703	14	0.001071	980	9.93	0.59	4.79	0.15	0.350091	0.248143	0.452269	12.7454	9.03389	16.4653
Arabian–Nubian Shield	S16 - 30	710	12	0.000945	1010	9.61	0.68	4.94	0.17	0.505496	0.367879	0.636935	18.4031	13.393	23.1883
Arabian–Nubian Shield	16EG32@01	2069.7		0.000257276		-2.78645	1.08107	6.1832	0.123777	3.75396	3.15547	4.12773	136.667	114.878	150.274
Arabian–Nubian Shield	16EG32@02	748.919		0.000730766		2.79228	0.962824	6.04157	0.149685	0.944001	0.71855	1.14005	34.3673	26.1595	41.5046
Arabian–Nubian Shield	16EG32@03	746.188		0.00101302		-10.0016	0.920039	5.40821	0.19361	0.41456	0.29743	0.52944	15.0925	10.8282	19.2748
Arabian–Nubian Shield	16EG32@04	2630.25		0.000789163		-6.83822	0.989231	2.04995	0.145727	0.796218	0.59869	0.97276	28.9871	21.7959	35.4143
Arabian–Nubian Shield	16EG32@05	845.53		0.00103558		-15.9442	0.965701	6.20514	0.132798	0.388176	0.277187	0.497964	14.1319	10.0913	18.1289
Arabian–Nubian Shield	16EG32@06	1764.43		0.000638323		-9.3706	0.870808	6.52381	0.0918284	1.23601	0.959221	1.46562	44.9981	34.9214	53.3572
Arabian–Nubian Shield	16EG32@07	732.276		0.000746485		-9.77714	0.957325	4.52002	0.314393	0.901718	0.684108	1.09238	32.8279	24.9056	39.7691
Arabian–Nubian Shield	16EG32@09	2060.88		0.00023003		-6.57919	0.876941	6.6046	0.100836	4.06431	3.43591	4.44494	147.965	125.088	161.822
Arabian–Nubian Shield	16EG32@10	812.751		0.000555736		3.58596	0.930684	7.62844	0.150645	1.5725	1.24166	1.83436	57.2483	45.2039	66.7817
Arabian–Nubian Shield	16EG32@11	2468.13		0.000398163		-8.21573	0.85819	5.92038	0.130314	2.48945	2.03168	2.81478	90.6308	73.9655	102.475
Arabian–Nubian Shield	16EG32@12	759.896		0.00129269		7.46046	0.980052	6.00865	0.195191	0.183436	0.124117	0.247611	6.67819	4.51861	9.01454
Arabian–Nubian Shield	16EG32@13	737.095		0.000864517		-26.4527	1.00183	6.99908	0.172907	0.639179	0.473081	0.792643	23.27	17.223	28.857
Arabian–Nubian Shield	16EG32@14	746.723		0.00113957		-9.593	0.984064	5.09253	0.214234	0.286656	0.200282	0.375384	10.436	7.29148	13.6662
Arabian–Nubian Shield	16EG32@15	822.122		0.000755869		6.6392	0.990826	7.15018	0.143434	0.877382	0.664338	1.06487	31.942	24.1859	38.7678
Arabian–Nubian Shield	16EG32@17	1742.92		0.000664967		-16.4043	4.9651	5.84657	0.127261	1.14363	0.882589	1.36325	41.635	32.1315	49.6306
Arabian–Nubian Shield	16EG32@18	2418.75		0.000465688		-10.1856	0.90671	5.60271	0.157539	2.04458	1.64518	2.3429	74.4351	59.8944	85.2957
Arabian–Nubian Shield	16EG32@19	852.927		0.000589314		8.77185	0.990233	5.16036	0.180745	1.42585	1.11797	1.67439	51.9095	40.701	60.9579
Arabian–Nubian Shield	16EG32@20	732.454		0.000565253		6.12282	0.96348	5.4117	0.155808	1.52947	1.20528	1.78753	55.6818	43.8794	65.0769
Arabian–Nubian Shield	16EG32@21	846.087		0.00076403		6.63741	0.96688	7.10779	0.198243	0.856751	0.647608	1.04152	31.1909	23.5768	37.9175
Arabian–Nubian Shield	16EG32@22	722.161		0.000353627		-2.91414	0.983041	7.48382	0.131246	2.83461	2.33507	3.1769	103.197	85.0106	115.658
Arabian–Nubian Shield	16EG32@23	1769.86		0.000448038		-10.3797	0.886138	6.27895	0.125766	2.15255	1.73847	2.45801	78.3657	63.2908	89.4864
Arabian–Nubian Shield	16EG32@24	738.011		0.00147543		6.0035	1.00599	5.43415	0.188792	0.107671	0.0701157	0.150697	3.91988	2.55263	5.48626
Arabian–Nubian Shield	16EG32@25	1936.66		0.000929726		-11.2627	0.930661	5.35585	0.162799	0.528515	0.385865	0.663929	19.2411	14.0478	24.171
Arabian–Nubian Shield	16EG32@26	771.557		0.00164379		-19.4332	1.0119	6.31137	0.14393	0.0659073	0.0414312	0.0953716	2.39942	1.50834	3.4721
Arabian–Nubian Shield	16EG32@27	1947.19		0.000997911		-9.83866	0.911743	6.16375	0.127938	0.433234	0.311814	0.551635	15.7723	11.3519	20.0828
Arabian–Nubian Shield	16EG32@28	848.312		0.000816901		6.93732	1.0158	6.82877	0.103214	0.734365	0.548981	0.902134	26.7353	19.9862	32.8431
Arabian–Nubian Shield	16EG32@29	725.298		0.000900202		-0.806448	1.01409	6.71058	0.14921	0.576022	0.423159	0.719389	20.9707	15.4055	26.1901
Arabian–Nubian Shield	16EG32@31	2206.94		0.000701067		-4.17873	0.85783	5.82937	0.168193	1.02938	0.788433	1.23587	37.4757	28.7037	44.9931
Arabian–Nubian Shield	16EG32@32	734.91		0.00106077		-9.50028	0.945196	5.49025	0.155667	0.360693	0.256206	0.465022	13.1314	9.32745	16.9296
Arabian–Nubian Shield	16EG32@33	759.013		0.00101294		-22.7065	0.97292	5.69372	0.133935	0.414666	0.297511	0.529565	15.0963	10.8312	19.2794
Arabian–Nubian Shield	16EG32@34	922.087		0.00120851		4.36863	0.935782	5.58351	0.182573	0.234459	0.161463	0.311252	8.53572	5.87824	11.3314
Arabian–Nubian Shield	16EG32@35	765.474		0.00193612		5.274	1.02627	5.68724	0.21533	0.0281058	0.0166183	0.043095	1.02322	0.605006	1.56892
Arabian–Nubian Shield	16EG32@36	829.728		0.000597486		7.69216	0.950036	6.69761	0.0960805	1.39228	1.08979	1.63762	50.6874	39.6747	59.6192
Arabian–Nubian Shield	16EG32@37	755.557		0.00206425		4.34042	0.993799	5.00052	0.0792862	0.0193446	0.011135	0.0304237	0.70426	0.405381	1.10761
Arabian–Nubian Shield	16EG32@38	746.043		0.00091094		-12.814	0.902576	5.24539	0.197888	0.558269	0.409196	0.698702	20.3243	14.8972	25.4369
Arabian–Nubian Shield	16EG32@39	823.47		0.000665281		5.12956	0.966151	5.8957	0.154163	1.14258	0.881722	1.36209	41.5969	32.1	49.5882
Arabian–Nubian Shield	16EG32@40	2852.48		0.000821494		-0.31599	0.867801	3.17726	0.147631	0.724597	0.541158	0.890945	26.3797	19.7014	32.4357
Arabian–Nubian Shield	16EG32@42	1766		0.000516337		-7.113	0.846825	5.70818	0.151397	1.76391	1.40435	2.04165	64.2167	51.1266	74.3283
Arabian–Nubian Shield	16EG32@43	725.964		0.00138166		5.1787	0.975788	7.27561	0.13212	0.141525	0.0939899	0.194433	5.15234	3.42179	7.07852
Arabian–Nubian Shield	16EG32@44	725.169		0.000912846		-16.1464	0.934368	5.8573	0.13565	0.555174	0.406765	0.695091	20.2117	14.8087	25.3055
Arabian–Nubian Shield	16EG32@45	765.586		0.00110736		-6.28689	0.92896	5.20391	0.140654	0.314879	0.221491	0.409719	11.4635	8.06359	14.9162
Arabian–Nubian Shield	16EG32@46	801.324		0.00154956		1.75554	1.00089	4.75707	0.119195	0.0867456	0.0556183	0.123205	3.15806	2.02484	4.48539
Arabian–Nubian Shield	16EG32@47	772.21		0.00210832		2.63369	1.03372	4.38304	0.196761	0.0170124	0.00970252	0.0269903	0.619353	0.35323	0.982609
Arabian–Nubian Shield	16EG32@48	800.489		0.00159362		-7.59585	0.975773	8.42403	0.165518	0.0762881	0.0484637	0.109302	2.77734	1.76437	3.97924
Arabian–Nubian Shield	16EG32@49	740.039		0.00101995		9.08622	1.01265	5.60287	0.171239	0.406276	0.291064	0.519572	14.7909	10.5965	18.9155
Arabian–Nubian Shield	16EG32@50	1752.55		0.000761287		-6.46722	0.974377	5.85671	0.0981448	0.863632	0.653184	1.04931	31.4414	23.7798	38.2012
Arabian–Nubian Shield	16EG32@51	717.346		0.00233464		-2.53445	1.08388	5.01041	0.159135	0.00879447	0.00478336	0.0145922	0.320171	0.174143	0.531242
Arabian–Nubian Shield	16EG32@52	729.601		0.00183863		3.49844	1.28881	3.12681	0.184796	0.0373448	0.0225368	0.0561662	1.35957	0.820475	2.04479
Arabian–Nubian Shield	16EG32@53	737.929		0.0023051		-14.4627	1.13176	5.00393	0.140872	0.00958543	0.00524594	0.0158118	0.348967	0.190984	0.575643
Arabian–Nubian Shield	16EG32@54	741.725		0.0016009		7.02719	1.00655	4.03145	0.168211	0.0746865	0.047374	0.107161	2.71904	1.7247	3.90132
Arabian–Nubian Shield	16EG32@55	753.054		0.00130812		-5.09599	0.932034	3.95366	0.15745	0.175368	0.118275	0.237445	6.38445	4.30592	8.64441
Arabian–Nubian Shield	16EG32@56	744.374		0.001381		3.81989	0.938358	5.98537	0.16096	0.141797	0.0941836	0.194781	5.16225	3.42885	7.09121
Arabian–Nubian Shield	16EG32@57	830.221		0.00097325		5.56325	1.00021	6.46762	0.188099	0.465531	0.336795	0.58987	16.9481	12.2614	21.4748
Arabian–Nubian Shield	16EG32@58	743.61		0.00122868		-12.5784	0.904015	5.53006	0.173557	0.221071	0.151601	0.294653	8.04831	5.5192	10.7271
Arabian–Nubian Shield	16EG32@59	841.603		0.00114385		3.53544	1.02898	5.01091	0.22313	0.283099	0.197619	0.37104	10.3065	7.19454	13.5081
Arabian–Nubian Shield	16EG32@60	762.685		0.00119188		-9.36331	0.977033	5.49216	0.117897	0.246107	0.170076	0.32564	8.95976	6.1918	11.8552
Arabian–Nubian Shield	16EG32@61	814.827		0.000664391		5.73546	1.0473	7.52038	0.115787	1.14555	0.884177	1.36539	41.7049	32.1893	49.7082
Arabian–Nubian Shield	16EG32@62	755.536		0.00133226		-1.89669	0.968012	5.70111	0.1542	0.163447	0.109679	0.222365	5.95047	3.99297	8.09544
Arabian–Nubian Shield	16EG32@63	929.826		0.000436576		-3.19165	0.972375	6.07265	0.199088	2.2257	1.80187	2.53578	81.0287	65.5989	92.3175
Arabian–Nubian Shield	16EG32@64	752.493		0.000555539		-7.04307	0.992029	4.8997	0.160209	1.5734	1.24243	1.83534	57.2813	45.2318	66.8175
Arabian–Nubian Shield	16EG32@65	2418.87		0.000554784		-8.25523	1.19589	5.50562	0.140435	1.57687	1.24536	1.83911	57.4074	45.3385	66.9546
Arabian–Nubian Shield	16EG32@67	778.516		0.00234514		12.4603	1.0129	5.19343	0.216381	0.00852925	0.00462891	0.0141816	0.310516	0.16852	0.516294
Arabian–Nubian Shield	16EG32@68	2337.9		0.000395001		-9.93793	1.08811	6.47011	0.127677	2.5125	2.05186	2.83907	91.4702	74.7	103.359
Arabian–Nubian Shield	16EG32@69	716.611		0.00103106		-21.116	0.94249	6.52347	0.172375	0.393325	0.28113	0.504118	14.3194	10.2348	18.3529
Arabian–Nubian Shield	16EG32@70	1999.17		0.000782575		-17.7139	1.00356	6.48557	0.15641	0.811659	0.611144	0.990331	29.5493	22.2493	36.054
Arabian–Nubian Shield	16EG32@71	717.697		0.0011492		7.01585	1.06831	5.2837	0.272809	0.278719	0.194344	0.365686	10.147	7.07528	13.3132
Arabian–Nubian Shield	16EG32@72	739.21		0.00130131		-9.96585	0.962273	5.68416	0.160304	0.178881	0.120816	0.241875	6.51235	4.39844	8.80571
Arabian–Nubian Shield	16EG32@74	730.778		0.00132971		-15.4741	1.01352	5.46174	0.133761	0.164669	0.110558	0.223914	5.99493	4.02496	8.15181
Arabian–Nubian Shield	16EG32@75	2497.72		0.000693425		-6.51419	0.784611	6.00083	0.136897	1.05258	0.807488	1.2618	38.3201	29.3974	45.9372
Arabian–Nubian Shield	16EG32@76	801.222		0.00082908		5.44913	1.00154	5.01789	0.132975	0.708747	0.52848	0.872767	25.8027	19.2399	31.774
Arabian–Nubian Shield	16EG32@78	824.797		0.00145743		2.77431	1.11172	5.71907	0.152041	0.113474	0.0741741	0.158254	4.13115	2.70038	5.76138
Arabian–Nubian Shield	16EG32@79	1760.48		0.00106946		-6.2171	0.999253	6.05619	0.181489	0.351669	0.249342	0.454169	12.8029	9.07755	16.5345
Arabian–Nubian Shield	16EG32@80	1746.57		0.000560006		-7.51707	0.952688	6.5923	0.196009	1.55304	1.2252	1.8132	56.5401	44.6047	66.0113
Arabian–Nubian Shield	16EG32@81	734.285		0.00119008		-8.41318	1.00657	5.76545	0.140797	0.247401	0.171035	0.327235	9.00687	6.2267	11.9133
Arabian–Nubian Shield	16EG32@82	714.136		0.00149373		-14.9945	1.01451	5.48418	0.124674	0.102077	0.0662185	0.143386	3.71623	2.41075	5.22012
Arabian–Nubian Shield	16EG32@83	715.589		0.00134341		8.8176	0.975743	6.27662	0.126133	0.158222	0.105925	0.215732	5.76023	3.8563	7.85394
Arabian–Nubian Shield	16EG32@84	2306.5		0.000335825		-6.75815	1.04892	7.2062	0.172693	2.98561	2.46865	3.33436	108.694	89.8737	121.391
Arabian–Nubian Shield	16EG32@85	2057.57		0.000507157		-4.68828	0.843497	6.80724	0.212622	1.81175	1.44521	2.09322	65.9586	52.6145	76.2057
Arabian–Nubian Shield	16EG32@87	853.671		0.000530004		10.0824	1.0605	5.30863	0.177585	1.695	1.34563	1.96722	61.7083	48.989	71.6185
Arabian–Nubian Shield	16EG32@88	1760.13		0.000965324		-5.29722	0.994338	6.37237	0.191592	0.476413	0.345241	0.602712	17.3443	12.5688	21.9423
Arabian–Nubian Shield	16EG32@89	745.046		0.00158276		-2.94038	1.04778	5.76146	0.303405	0.0787414	0.0501362	0.112574	2.86666	1.82526	4.09838
Arabian–Nubian Shield	16EG32@90	785.63		0.00168379		9.40049	0.970508	5.34404	0.211348	0.0586529	0.0365631	0.0855491	2.13532	1.33112	3.1145
Arabian–Nubian Shield	16EG32@91	798.536		0.00101333		8.36895	1.03685	6.26565	0.202009	0.414192	0.297147	0.529002	15.0791	10.8179	19.2588
Arabian–Nubian Shield	16EG32@92	830.122		0.002108		9.57986	1.05219	7.91236	0.147341	0.017028	0.00971209	0.0270135	0.619923	0.353579	0.983452
Arabian–Nubian Shield	16EG32@93	795.668		0.000916227		-3.94735	0.926647	10.6138	0.178662	0.549729	0.40249	0.688734	20.0134	14.6531	25.0741
Arabian–Nubian Shield	16EG32@95	733.492		0.000782667		-8.77685	0.907241	5.53953	0.14901	0.811443	0.610969	0.990085	29.5414	22.2429	36.045
Arabian–Nubian Shield	16EG32@96	2272.34		0.000498874		-13.4991	0.945291	6.19184	0.168187	1.85604	1.48312	2.14087	67.5709	53.9943	77.9405
Arabian–Nubian Shield	16EG32@97	902.006		0.00391854		11.1608	1.07407	5.63778	0.179068	8.68404e-05	3.38923e-05	0.000197185	0.00316151	0.00123388	0.00717872
Arabian–Nubian Shield	16EG32@98	803.437		0.00166055		8.57783	1.06007	8.0505	0.107085	0.062764	0.0393169	0.0911251	2.28499	1.43137	3.3175
Arabian–Nubian Shield	16EG32@99	742.909		0.000784411		-7.65264	0.998222	6.39631	0.119754	0.807327	0.607648	0.985403	29.3915	22.122	35.8746
Arabian–Nubian Shield	16EG32@100	2567.55		0.000468073		-1.42104	0.840804	6.15025	0.176126	2.03042	1.63296	2.32777	73.9193	59.4496	84.7447
Arabian–Nubian Shield	16EG32@101	1750.37		0.00127275		-6.04025	0.902852	5.88744	0.146547	0.194416	0.132097	0.261397	7.0779	4.80912	9.51644
Arabian–Nubian Shield	16EG32@102	743.632		0.00133126		-2.28973	1.04389	5.39173	0.527475	0.163926	0.110023	0.222972	5.96789	4.0055	8.11752
Arabian–Nubian Shield	16EG32@103	748.85		0.00107282		-7.99225	0.943021	5.5573	0.161681	0.348238	0.246736	0.450038	12.678	8.98267	16.3841
Arabian–Nubian Shield	16EG32@104	755.058		0.00130984		-5.08986	1.04192	5.42963	0.117694	0.17449	0.117641	0.236337	6.35249	4.28282	8.60408
Arabian–Nubian Shield	16EG32@105	814.133		0.000589509		2.82881	0.87987	6.60208	0.134912	1.42504	1.11729	1.67351	51.8801	40.6762	60.9257
Arabian–Nubian Shield	16EG32@106	745.801		0.000849436		-11.4008	0.927112	6.38066	0.148947	0.667908	0.495909	0.8258	24.3159	18.0541	30.0641
Arabian–Nubian Shield	16EG32@107	746.436		0.00116419		-7.18668	0.9504	5.287	0.113108	0.266804	0.185453	0.351094	9.71327	6.75159	12.7819
Arabian–Nubian Shield	16EG32@108	1970.09		0.000828556		-8.05559	0.870947	6.60807	0.163693	0.709832	0.529347	0.874011	25.8421	19.2714	31.8193
Arabian–Nubian Shield	16EG32@109	743.96		0.00091574		-22.1245	1.05968	6.44449	0.166964	0.55051	0.403103	0.689646	20.0419	14.6754	25.1073
Arabian–Nubian Shield	16EG32@110	1751.8		0.000489562		-8.35559	0.932302	6.35822	0.158238	1.90711	1.52691	2.19573	69.4304	55.5885	79.9378
Arabian–Nubian Shield	16EG32@111	739.033		0.000757829		5.02353	0.979263	5.61216	0.171651	0.872381	0.66028	1.05922	31.7599	24.0381	38.5618
Arabian–Nubian Shield	16EG32@112	738.019		0.00163741		-6.97966	1.11694	4.8267	0.145608	0.067144	0.0422651	0.0970385	2.44444	1.5387	3.53278
Arabian–Nubian Shield	16EG32@113	720.281		0.000961751		8.04401	0.928083	5.77523	0.21378	0.481402	0.349117	0.608593	17.5259	12.71	22.1564
Arabian–Nubian Shield	16EG32@115	748.701		0.00169175		-7.82392	1.03071	5.7892	0.153313	0.0573072	0.0356647	0.0837182	2.08632	1.29841	3.04784
Arabian–Nubian Shield	16EG32@116	1846.12		0.000566734		-13.957	1.03268	5.91088	0.101667	1.52288	1.19971	1.78035	55.4419	43.6768	64.8155
Arabian–Nubian Shield	16EG32@117	740.934		0.00143533		-15.0322	1.01779	4.64019	0.143969	0.121025	0.079477	0.168047	4.40605	2.89344	6.11792
Arabian–Nubian Shield	16EG32@118	783.746		0.0013275		-7.35368	1.04951	9.89403	0.125827	0.165731	0.111322	0.22526	6.03362	4.05281	8.20082
Arabian–Nubian Shield	16EG32@119	756.219		0.00075789		1.61	1.03	7.26486	0.177518	0.872228	0.660156	1.05904	31.7543	24.0336	38.5555
Arabian–Nubian Shield	16EG32@120	728.194		0.00122424		-9.71791	0.976141	7.84286	0.204923	0.223953	0.153721	0.298231	8.15322	5.59636	10.8574
Arabian–Nubian Shield	16EG33@01	755		0.00108026		-7.34821	0.915133	4.87857	0.228212	0.340766	0.241066	0.441031	12.4059	8.77624	16.0562
Arabian–Nubian Shield	16EG33@03	2507.95		0.000346621		1.33813	1.17822	5.481	0.181492	2.89311	2.38676	3.23796	105.326	86.8923	117.881
Arabian–Nubian Shield	16EG33@05	755		0.00120522		-10.2346	0.865535	5.63161	0.117552	0.236723	0.163135	0.314052	8.61814	5.9391	11.4334
Arabian–Nubian Shield	16EG33@06	755		0.0013675		-6.75867	0.89294	5.22068	0.145132	0.14749	0.0982427	0.202061	5.36951	3.57662	7.35622
Arabian–Nubian Shield	16EG33@08	755		0.00130366		-8.34348	0.895826	1.09341	0.267375	0.177664	0.119936	0.240341	6.46804	4.36638	8.74986
Arabian–Nubian Shield	16EG33@09	755		0.00284094		-4.70531	0.984031	5.18078	0.245364	0.00200976	0.000983085	0.00368642	0.0731674	0.0357902	0.134208
Arabian–Nubian Shield	16EG33@10	755		0.00143718		-7.12715	0.897155	1.49038	0.183613	0.120376	0.0790199	0.167206	4.3824	2.8768	6.08732
Arabian–Nubian Shield	16EG33@11	755		0.00227883		-7.80137	0.931483	5.68796	0.201713	0.0103482	0.00569465	0.0169814	0.376737	0.207319	0.618227
Arabian–Nubian Shield	16EG33@12	755		0.0010683		-8.63064	0.859424	4.84914	0.240837	0.352855	0.250244	0.455597	12.8461	9.11038	16.5865
Arabian–Nubian Shield	16EG33@13	755		0.00170234		-7.57669	0.891079	5.72487	0.166973	0.0555644	0.0345034	0.0813427	2.02288	1.25613	2.96136
Arabian–Nubian Shield	16EG33@14	755		0.00196977		-6.60079	0.971239	5.23514	0.19216	0.0254791	0.0149593	0.0393287	0.927592	0.544609	1.4318
Arabian–Nubian Shield	16EG33@17	755		0.00100144		-8.76557	0.889714	5.20721	0.19771	0.428799	0.308394	0.54637	15.6109	11.2274	19.8911
Arabian–Nubian Shield	16EG33@18	755		0.00158728		-8.3893	0.930617	5.12443	0.209345	0.0777113	0.0494335	0.111201	2.82916	1.79968	4.04839
Arabian–Nubian Shield	16EG33@19	755		0.00131842		-9.48236	0.991404	5.31244	0.154438	0.170178	0.114527	0.230889	6.19551	4.16948	8.40574
Arabian–Nubian Shield	16EG33@20	755		0.00182053		-7.76486	1.00008	5.58822	0.226001	0.0393692	0.0238488	0.058999	1.43327	0.86824	2.14792
Arabian–Nubian Shield	16EG33@21	755		0.000927662		-9.43767	0.96856	5.27853	0.157984	0.531705	0.388362	0.667662	19.3572	14.1387	24.3069
Arabian–Nubian Shield	16EG33@22	755		0.000855832		-9.27707	0.954249	5.67001	0.145301	0.65557	0.486096	0.811572	23.8667	17.6968	29.5461
Arabian–Nubian Shield	16EG33@24	755		0.00142755		-9.049	0.976259	5.29	0.225799	0.123802	0.0814331	0.171638	4.50713	2.96465	6.24865
Arabian–Nubian Shield	16EG33@25	755		0.00246384		-9.85487	1.21246	5.72088	0.164884	0.0060342	0.00319437	0.0102717	0.219681	0.116294	0.373952
Arabian–Nubian Shield	16EG33@26	755		0.00168248		-6.62949	1.01639	5.58623	0.257586	0.0588775	0.0367132	0.0858544	2.14349	1.33658	3.12561
Arabian–Nubian Shield	16EG33@31	755		0.00359212		-1.86751	1.57525	5.71888	0.21919	0.000224922	9.39978e-05	0.000478747	0.00818851	0.00342208	0.0174293
Arabian–Nubian Shield	16EG33@32	755		0.00147969		-8.29654	1.0692	5.288	0.143592	0.106342	0.0691885	0.148962	3.8715	2.51888	5.42312
Arabian–Nubian Shield	16EG33@33	755		0.0014872		-6.96734	0.94011	5.18876	0.223699	0.10404	0.0675843	0.145955	3.78769	2.46047	5.31362
Arabian–Nubian Shield	16EG33@34	755		0.00150178		-8.49158	1.02349	5.55431	0.0974536	0.0997109	0.0645744	0.140285	3.63007	2.3509	5.10723
Arabian–Nubian Shield	16EG33@35	755		0.00246346		-6.9222	1.04343	5.27853	0.19821	0.00604086	0.00319815	0.0102823	0.219924	0.116432	0.374337
Arabian–Nubian Shield	16EG33@37	755		0.000979223		-10.9246	1.07361	6.07865	0.275078	0.457494	0.330567	0.580373	16.6555	12.0346	21.1291
Arabian–Nubian Shield	16EG33@38	755		0.00134142		-7.58356	1.01421	5.08453	0.140046	0.159144	0.106586	0.216903	5.79378	3.88038	7.89657
Arabian–Nubian Shield	16EG33@39	755		0.0026568		-7.02538	1.07459	5.77744	0.193718	0.00343791	0.00174783	0.00608018	0.125161	0.0636315	0.221355
Arabian–Nubian Shield	16EG33@40	755		0.00225558		-7.24341	1.03598	5.89762	0.179866	0.0110741	0.00612386	0.0180891	0.403162	0.222945	0.658552
Arabian–Nubian Shield	16EG33@42	755		0.00220803		-7.58639	0.984032	5.39655	0.279044	0.0127208	0.00710492	0.0205842	0.463113	0.258662	0.749388
Arabian–Nubian Shield	16EG33@43	755		0.00235145		-7.65739	1.15308	5.34469	0.264695	0.00837378	0.00453853	0.0139405	0.304856	0.16523	0.507517
Arabian–Nubian Shield	16EG33@44	755		0.00313288		-6.70986	1.09714	5.07539	0.255034	0.00085804	0.000394809	0.00166755	0.0312378	0.0143734	0.0607088
Arabian–Nubian Shield	16EG33@45	755		0.00112503		-8.28766	1.0339	5.43645	0.211155	0.299065	0.209589	0.390507	10.8877	7.63031	14.2168
Arabian–Nubian Shield	16EG33@47	755		0.0014445		-8.63865	0.97027	5.0694	0.321367	0.117835	0.0772334	0.163914	4.2899	2.81176	5.96747
Arabian–Nubian Shield	16EG33@48	755		0.00265563		-6.88679	1.0182	4.91281	0.203436	0.00344965	0.00175423	0.00609953	0.125588	0.0638645	0.222059
Arabian–Nubian Shield	16EG33@50	755		0.00254494		-5.9899	0.954446	5.1871	0.297001	0.00476352	0.0024792	0.00824	0.173421	0.0902579	0.299985
Arabian–Nubian Shield	16EG33@51	755		0.00264783		-10.3212	1.01624	5.43196	0.294781	0.00352901	0.00179752	0.00623022	0.128477	0.0654406	0.226817
Arabian–Nubian Shield	16EG33@52	755		0.00185689		-6.66938	0.865805	5.54915	0.165685	0.0354094	0.0212872	0.0534482	1.28911	0.774983	1.94584
Arabian–Nubian Shield	16EG33@53	755		0.00233122		-8.75262	1.09567	5.23048	0.173071	0.00888262	0.00483477	0.0147284	0.323381	0.176015	0.536203
Arabian–Nubian Shield	16EG33@56	755		0.00235243		-7.88717	1.2676	5.48333	0.192589	0.00834987	0.00452464	0.0139034	0.303985	0.164724	0.506166
Arabian–Nubian Shield	16EG33@57	755		0.00391683		-3.67902	1.12493	5.21801	0.285173	8.72745e-05	3.40739e-05	0.000198104	0.00317732	0.0012405	0.00721216
Arabian–Nubian Shield	16EG33@58	755		0.00152951		-7.79332	0.964541	3.62117	0.413459	0.0919665	0.059214	0.130102	3.34813	2.15574	4.73651
Arabian–Nubian Shield	16EG33@62	755		0.00242889		-7.17374	1.11743	5.42498	0.237708	0.00668144	0.003563	0.011295	0.243245	0.129715	0.411207
Arabian–Nubian Shield	16EG33@63	755		0.00185215		-9.45237	0.967395	5.50277	0.22812	0.0359015	0.0216045	0.0541403	1.30703	0.786534	1.97103
Arabian–Nubian Shield	16EG33@64	755		0.00145984		-9.98241	0.912008	4.98013	0.225058	0.11268	0.0736176	0.157221	4.10223	2.68012	5.72377
Arabian–Nubian Shield	16EG33@69	755		0.00116782		-8.88322	0.984805	5.34219	0.23415	0.263994	0.18336	0.347647	9.61098	6.67541	12.6564
Arabian–Nubian Shield	16EG33@70	755		0.0014042		-7.98018	0.934678	5.13723	0.299175	0.132525	0.0875984	0.182883	4.82471	3.18911	6.65806
Arabian–Nubian Shield	16EG33@71	808.63		0.00111489		-7.95671	0.86192	6.57299	0.32505	0.308043	0.216341	0.401423	11.2146	7.8761	14.6142
Arabian–Nubian Shield	16EG33@72	755		0.000748726		-16.341	0.98048	7.01159	0.243445	0.895844	0.679333	1.08574	32.6141	24.7318	39.5276
Arabian–Nubian Shield	16EG33@73	755		0.00193262		-7.5325	0.947466	5.38658	0.258233	0.0283942	0.0168011	0.043507	1.03372	0.611663	1.58392
Arabian–Nubian Shield	16EG33@74	755		0.00182407		-6.88358	0.941949	5.21752	0.195431	0.0389642	0.023586	0.0584331	1.41853	0.858671	2.12732
Arabian–Nubian Shield	16EG33@75	755		0.00198867		-7.24405	0.909218	5.29531	0.267944	0.0241137	0.0141018	0.0373607	0.877885	0.513389	1.36015
Arabian–Nubian Shield	16EG33@76	755		0.00114875		-9.00161	0.953327	3.53439	0.331973	0.279084	0.194617	0.366133	10.1603	7.08522	13.3294
Arabian–Nubian Shield	16EG33@78	755		0.00111798		-6.79146	0.909433	4.93475	0.461294	0.305279	0.214261	0.398065	11.114	7.80039	14.492
Arabian–Nubian Shield	16EG33@79	755		0.00299261		-6.00907	0.945885	5.43944	0.323876	0.00129154	0.000612001	0.00244126	0.0470198	0.0222805	0.0888765
Arabian–Nubian Shield	16EG33@80	755		0.00183066		-5.4187	0.965893	5.30579	0.253585	0.0382227	0.0231051	0.0573959	1.39153	0.841166	2.08956
Arabian–Nubian Shield	16EG33@81	755		0.00175156		-6.87186	0.911006	5.29232	0.294119	0.0481371	0.0295846	0.0711599	1.75248	1.07706	2.59065
Arabian–Nubian Shield	16EG33@82	755		0.00262044		-5.87776	0.94198	5.1103	0.255583	0.0038224	0.00195817	0.00671166	0.139158	0.0712891	0.244345
Arabian–Nubian Shield	16EG33@83	755		0.00260386		-5.49657	0.997283	5.40353	0.183178	0.00401173	0.00206231	0.007021	0.146051	0.0750806	0.255606
Arabian–Nubian Shield	16EG33@85	755		0.00175254		-8.62893	0.945238	5.05394	0.271751	0.048	0.0294944	0.070971	1.74749	1.07377	2.58377
Arabian–Nubian Shield	16EG33@88	755		0.00119376		-10.0051	0.987619	5.76808	0.232571	0.244765	0.169083	0.323985	8.91093	6.15563	11.795
Arabian–Nubian Shield	16EG33@89	1786.82		0.00132221		-9.70498	0.984519	5.19208	0.238926	0.168309	0.11318	0.228524	6.12747	4.12041	8.31965
Arabian–Nubian Shield	16EG33@91	755		0.0020468		-7.46318	0.934492	4.81805	0.232723	0.0203545	0.0117592	0.0319015	0.741026	0.428107	1.16141
Arabian–Nubian Shield	16EG33@92	755		0.0025336		-6.77734	1.03253	5.79352	0.332035	0.00492368	0.00256866	0.00849795	0.179252	0.0935147	0.309376
Arabian–Nubian Shield	16EG33@94	755		0.00150325		-8.35695	0.921557	5.41949	0.265745	0.0992848	0.0642787	0.139727	3.61456	2.34013	5.08689
Arabian–Nubian Shield	16EG33@95	755		0.00159218		-9.12625	0.920945	5.30529	0.224627	0.076609	0.0486822	0.10973	2.78903	1.77233	3.99484
Arabian–Nubian Shield	16EG33@102	755		0.00340752		-6.87461	1.13221	5.27586	0.159922	0.000385265	0.000167357	0.000790597	0.0140259	0.0060928	0.0287825
Arabian–Nubian Shield	16EG33@103	755		0.00145278		-10.6882	0.942817	5.69577	0.223164	0.115023	0.0752599	0.160266	4.18754	2.73991	5.83465
Arabian–Nubian Shield	16EG33@104	755		0.00249599		-7.01772	0.952175	5.28335	0.211033	0.00549433	0.00288904	0.00941246	0.200026	0.105179	0.34267
Arabian–Nubian Shield	16EG33@105	755		0.00163132		-9.00708	0.93465	5.36364	0.204158	0.0683472	0.0430774	0.0986583	2.48825	1.56828	3.59175
Arabian–Nubian Shield	16EG33@106	755		0.00220256		-8.10307	0.938286	5.29581	0.305969	0.0129251	0.00722731	0.0208922	0.470551	0.263117	0.7606
Arabian–Nubian Shield	16EG33@108	755		0.00222688		-9.2616	0.96795	4.90533	0.161756	0.0120407	0.00669855	0.0195565	0.438352	0.243867	0.711974
Arabian–Nubian Shield	16EG33@109	755		0.00178598		-6.11796	0.972592	5.4539	0.242027	0.0435406	0.0265673	0.0648053	1.58514	0.96721	2.3593
Arabian–Nubian Shield	16EG33@110	755		0.00107504		-10.668	0.960337	5.4539	0.259006	0.345991	0.245029	0.44733	12.5961	8.92054	16.2855
Arabian–Nubian Shield	16EG33@111	755		0.0023193		-7.49156	0.866595	5.41849	0.293724	0.0091966	0.00501818	0.0152131	0.334812	0.182692	0.553849
Arabian–Nubian Shield	16EG33@114	755		0.00408804		-6.6335	1.17355	6.16356	0.258074	5.29797e-05	1.99555e-05	0.000124406	0.00192878	0.000726502	0.00452913
Arabian–Nubian Shield	16EG33@116	755		0.00170938		-9.79117	0.977549	6.8767	0.295093	0.0544358	0.0337528	0.0798016	1.98179	1.2288	2.90526
Arabian–Nubian Shield	16EG33@117	755		0.00132925		-9.56767	0.941764	5.47136	0.258455	0.164888	0.110715	0.224191	6.0029	4.0307	8.1619
Arabian–Nubian Shield	16EG33@119	755		0.00153451		-8.12696	0.918654	5.3771	0.270884	0.0906366	0.0582966	0.128348	3.29972	2.12235	4.67264
Arabian–Nubian Shield	16EG33@120	755		0.0019146		-8.92601	1.02007	6.65977	0.249765	0.0299255	0.0177742	0.04569	1.08947	0.647088	1.66339
Iceland				0.001384						0.140563	0.0933056	0.193201	5.11734	3.39688	7.03369
Iceland				0.00233						0.00891414	0.00485316	0.0147771	0.324528	0.176684	0.537977
Iceland				0.00287						0.0018465	0.000897745	0.00340652	0.0672239	0.0326833	0.124018
Iceland				0.001411						0.129923	0.0857559	0.179534	4.72996	3.12203	6.53611
Iceland				0.0006231						1.2921	1.00596	1.52751	47.0402	36.6228	55.6107
Iceland				0.0012331						0.218241	0.149522	0.291135	7.94527	5.44349	10.5991
Iceland				0.0008026						0.765631	0.574072	0.937883	27.8735	20.8997	34.1446
Iceland				0.001694						0.0569325	0.0354148	0.0832079	2.07268	1.28931	3.02927
Iceland				0.00211						0.0169292	0.00965166	0.0268672	0.616323	0.351378	0.978128
Iceland				0.000766						0.851846	0.643634	1.03596	31.0123	23.4321	37.7151
Iceland				0.001138						0.28797	0.201267	0.376987	10.4838	7.32731	13.7246
Iceland				0.00148						0.106248	0.0691225	0.148839	3.86805	2.51647	5.41863
Iceland				0.00294						0.00150563	0.000721358	0.00281644	0.0548141	0.0262618	0.102535
Iceland				0.000695						1.04775	0.803523	1.25641	38.1445	29.253	45.741
Iceland				0.0012						0.240351	0.165816	0.318535	8.75021	6.03671	11.5966
Iceland				0.0008098						0.749727	0.5613	0.919711	27.2945	20.4347	33.483
Iceland				0.002173						0.0140886	0.00792685	0.0226399	0.512909	0.288585	0.824227
Iceland				0.00232						0.00917785	0.00500722	0.0151842	0.334129	0.182293	0.552796
Iceland				0.00282						0.00213628	0.00104957	0.00390227	0.0777735	0.0382106	0.142066
Iceland				0.002384						0.00761564	0.00409956	0.0127603	0.277255	0.149249	0.464553
Iceland				0.002957						0.00143283	0.000684036	0.00268929	0.0521635	0.024903	0.0979063
Iceland				0.004431						1.94925e-05	6.83298e-06	4.89891e-05	0.000709644	0.000248761	0.0017835
Iceland				0.00236						0.0081676	0.00441885	0.0136203	0.29735	0.160873	0.49586
Iceland				0.003043						0.00111507	0.000522832	0.00212885	0.0405954	0.0190342	0.0775029
Iceland				0.00349						0.00030292	0.000129332	0.000631857	0.0110281	0.00470847	0.0230034
Iceland				0.00535						1.3374e-06	3.86697e-07	4.03221e-06	4.86895e-05	1.40781e-05	0.000146797
Iceland				0.00494						4.41967e-06	1.39255e-06	1.22858e-05	0.000160902	5.06971e-05	0.000447277
Iceland				0.003726						0.000152235	6.18607e-05	0.000332739	0.00554225	0.0022521	0.0121137
Iceland				0.004843						5.86418e-06	1.88563e-06	1.59911e-05	0.000213491	6.86481e-05	0.000582172
Iceland				0.00334						0.000469087	0.000206673	0.000949819	0.0170776	0.00752412	0.0345791
Iceland				0.001974						0.0251671	0.0147631	0.0388797	0.916235	0.537465	1.41545
Iceland				0.00421						3.7127e-05	1.36315e-05	8.93125e-05	0.00135165	0.00049627	0.00325151
Iceland				0.002006						0.0229254	0.0133582	0.0356417	0.834622	0.486319	1.29757
Iceland				0.002756						0.0025745	0.00128195	0.00464352	0.0937273	0.0466706	0.169052
Iceland				0.00283205						0.00206255	0.00101079	0.00377659	0.0750892	0.0367988	0.137491
Iceland				0.00553962						7.69439e-07	2.13809e-07	2.40861e-06	2.80122e-05	7.78394e-06	8.76877e-05
Iceland				0.00421537						3.65506e-05	1.34048e-05	8.80195e-05	0.00133066	0.000488016	0.00320444
Iceland				0.00460365						1.17834e-05	3.98383e-06	3.06444e-05	0.000428985	0.000145035	0.00111564
Iceland				0.00266886						0.00331914	0.00168319	0.00588415	0.120837	0.0612781	0.214218
Iceland				0.00473186						8.10836e-06	2.66868e-06	2.16294e-05	0.000295193	9.71559e-05	0.000787439
Iceland				0.00396628						7.55571e-05	2.91951e-05	0.000173194	0.00275073	0.00106288	0.00630532
Iceland				0.00249761						0.00546837	0.00287441	0.009371	0.199081	0.104646	0.34116
Iceland				0.00560681						6.32551e-07	1.73314e-07	2.00663e-06	2.30286e-05	6.30965e-06	7.30533e-05
Iceland				0.0043676						2.34498e-05	8.33011e-06	5.81993e-05	0.000853713	0.000303266	0.0021188
Iceland				0.00594991						2.32639e-07	5.93193e-08	7.89887e-07	8.46945e-06	2.15958e-06	2.87566e-05
Iceland				0.00456432						1.32147e-05	4.5047e-06	3.41002e-05	0.000481094	0.000163998	0.00124145
Iceland				0.0034689						0.000322135	0.000138146	0.000669136	0.0117277	0.00502933	0.0243605
Iceland				0.00555933						7.26466e-07	2.01036e-07	2.28298e-06	2.64477e-05	7.31891e-06	8.31142e-05
Iceland				0.004619						1.12675e-05	3.79719e-06	2.93922e-05	0.000410205	0.00013824	0.00107005
Iceland				0.00432						2.69409e-05	9.6662e-06	6.62363e-05	0.00098081	0.000351908	0.0024114
Iceland				0.003066						0.00104275	0.000486572	0.00199987	0.0379625	0.0177142	0.0728072
Iceland				0.00477						7.255e-06	2.3688e-06	1.94998e-05	0.000264126	8.62387e-05	0.000709908
Iceland				0.0054						1.15599e-06	3.30759e-07	3.51994e-06	4.2085e-05	1.20416e-05	0.000128147
Iceland				0.00673						2.39307e-08	5.18174e-09	9.48285e-08	8.7122e-07	1.88646e-07	3.45233e-06
Iceland				0.006592						3.57837e-08	7.97563e-09	1.37975e-07	1.30274e-06	2.90361e-07	5.02311e-06
Iceland				0.00445						1.84421e-05	6.43908e-06	4.65239e-05	0.000671403	0.000234421	0.00169375
Iceland				0.007655						1.61344e-09	2.87802e-10	7.67895e-09	5.87389e-08	1.04777e-08	2.7956e-07
Iceland				0.006608						3.41528e-08	7.58666e-09	1.32104e-07	1.24337e-06	2.762e-07	4.80939e-06
Iceland				0.002149						0.0151097	0.00854422	0.0241656	0.550083	0.311061	0.879772
Iceland				0.00488						5.26453e-06	1.67973e-06	1.44615e-05	0.00019166	6.11524e-05	0.000526485
Iceland				0.002716						0.00289294	0.00145264	0.0051767	0.10532	0.0528847	0.188463
Iceland				0.00198						0.0247307	0.0144889	0.0382509	0.900347	0.527482	1.39256
Iceland				0.00296						0.00142035	0.000677653	0.00266746	0.0517093	0.0246706	0.0971114
Iceland				0.00231						0.00944937	0.00516616	0.0156025	0.344014	0.188079	0.568023
Iceland				0.0029						0.00169186	0.000817406	0.00313983	0.061594	0.0297585	0.114309
Iceland				0.001966						0.025761	0.0151368	0.0397342	0.937856	0.551071	1.44656
Iceland				0.001512						0.0967837	0.0625446	0.136443	3.52351	2.277	4.96735
Australia/Stavely belt				0.000984		10.77	2.25	4.28	0.43	0.451167	0.325669	0.572888	16.4252	11.8563	20.8566
Australia/Stavely belt				0.001162		10.5	2.62	4.2	0.43	0.26851	0.186724	0.353186	9.77536	6.79786	12.8581
Australia/Stavely belt				0.00086		11.8	1.91	4.33	0.43	0.647652	0.479805	0.802432	23.5784	17.4678	29.2133
Australia/Stavely belt				0.000969		11.06	2.06	4.47	0.43	0.471335	0.341298	0.596722	17.1594	12.4253	21.7243
Australia/Stavely belt				0.000439		11.84	2.04	4.57	0.43	2.21002	1.78827	2.51913	80.4581	65.1038	91.7114
Australia/Stavely belt				0.000366		11.61	1.89	4.58	0.43	2.73418	2.2465	3.07186	99.5405	81.7862	111.834
Australia/Stavely belt				0.000676		11.37	2.09	4.32	0.43	1.10743	0.852677	1.32299	40.317	31.0425	48.1646
Australia/Stavely belt				0.000547		10.67	1.94	4.23	0.43	1.61306	1.27603	1.87843	58.7251	46.455	68.386
Australia/Stavely belt				0.000945		12.98	2.13	4.29	0.43	0.505496	0.367879	0.636935	18.4031	13.393	23.1883
Australia/Stavely belt				0.000647		11.2	1.96	4.42	0.43	1.20513	0.93356	1.43146	43.874	33.9872	52.1138
Australia/Stavely belt				0.000688		11.05	1.94	4.43	0.43	1.06935	0.821293	1.28054	38.9309	29.9	46.6194
Australia/Stavely belt				0.001159		11.35	2.04	4.33	0.43	0.270868	0.188483	0.356077	9.86123	6.86189	12.9633
Australia/Stavely belt				0.0008		10.34	1.96	4.61	0.43	0.771456	0.578756	0.944532	28.0856	21.0702	34.3866
Australia/Stavely belt				0.000578		11.26	2.02	4.06	0.43	1.47367	1.15821	1.72667	53.6504	42.1658	62.8612
Australia/Stavely belt				0.000293		12.56	2.4	4.12	0.43	3.38265	2.82215	3.74586	123.149	102.743	136.372
Australia/Stavely belt				0.000898		13.21	2.37	4.08	0.43	0.579732	0.426081	0.723706	21.1057	15.5119	26.3473
Australia/Stavely belt				0.000576		10.27	2.15	4.41	0.43	1.48229	1.16547	1.73608	53.9641	42.4301	63.2038
Australia/Stavely belt				0.000892		10.87	2.22	4.3	0.43	0.589962	0.434146	0.735603	21.4782	15.8055	26.7803
Australia/Stavely belt				0.00086		13.04	2.56	3.89	0.43	0.647652	0.479805	0.802432	23.5784	17.4678	29.2133
Australia/Stavely belt				0.000613		10.75	2.04	4.31	0.43	1.33071	1.03821	1.57002	48.4459	37.7971	57.1581
Australia/Stavely belt				0.00067		11.86	2.04	4.49	0.43	1.12697	0.868815	1.34473	41.0285	31.6301	48.9564
Australia/Stavely belt				0.00066		9.18	3.13	5	0.33	1.16031	0.896394	1.38178	42.2423	32.6341	50.3049
Australia/Stavely belt				0.000464		10.2	2.65	5.03	0.35	2.05467	1.65388	2.35368	74.8024	60.2112	85.6879
Australia/Stavely belt				0.000638		7.59	2.53	4.8	0.35	1.23717	0.960189	1.4669	45.0405	34.9566	53.404
Australia/Stavely belt				0.000608		9.12	2.99	4.89	0.33	1.35025	1.05456	1.5915	49.1573	38.3924	57.94
Australia/Stavely belt				0.000757		8.72	2.32	4.53	0.34	0.874493	0.661993	1.06161	31.8368	24.1005	38.6488
Australia/Stavely belt				0.00054		8.65	2.58	4.84	0.35	1.64632	1.30425	1.9145	59.9359	47.4824	69.6993
Australia/Stavely belt				0.000698		9.77	3.6	4.41	0.33	1.03863	0.796025	1.24621	37.8123	28.9801	45.3696
Australia/Stavely belt				0.000863		10.6	2.24	4.55	0.34	0.642012	0.475328	0.795917	23.3731	17.3048	28.9761
Australia/Stavely belt				0.001088		10.52	2.56	4.48	0.33	0.333162	0.235304	0.431851	12.1291	8.56649	15.722
Australia/Stavely belt				0.00052		8.27	2.4	4.79	0.33	1.74517	1.38836	2.02143	63.5346	50.5447	73.5921
Australia/Stavely belt				0.000916		10.68	3.51	4.55	0.34	0.550093	0.402776	0.689159	20.0267	14.6635	25.0895
Australia/Stavely belt				0.001655		7.96	2.65	5.03	0.34	0.0637882	0.040005	0.0925103	2.32227	1.45642	3.36793
Australia/Stavely belt				0.000639		9.57	2.7	4.56	0.33	1.23357	0.957193	1.46292	44.9094	34.8476	53.2591
Australia/Stavely belt				0.00059		10.05	2.7	4.04	0.34	1.423	1.11558	1.67128	51.8059	40.6138	60.8444
Australia/Stavely belt				0.000991		8.89	2.96	5.24	0.33	0.442053	0.318622	0.562094	16.0934	11.5998	20.4636
Australia/Stavely belt				0.001501		8.61	2.53	4.71	0.33	0.0999378	0.064732	0.140583	3.63834	2.35663	5.11807
Australia/Stavely belt				0.00151		10.17	2.99	4.89	0.34	0.0973497	0.0629368	0.137187	3.54411	2.29128	4.99442
Australia/Stavely belt				0.0006276		8.55	2.75	4.81	0.33	1.27526	0.991908	1.50895	46.4271	36.1114	54.9348
Australia/Stavely belt				0.001997		8.09	3.1	4.79	0.34	0.0235349	0.0137392	0.0365241	0.856811	0.50019	1.3297
Australia/Stavely belt				0.000748		11.24	2.51	5.08	0.33	0.897743	0.680876	1.08789	32.6832	24.788	39.6057
Australia/Stavely belt				0.000624		10.68	2.19	4.49	0.34	1.28871	1.00313	1.52378	46.9169	36.5199	55.4748
Australia/Stavely belt				0.000938		9.97	2.47	4.91	0.34	0.515918	0.376015	0.649167	18.7825	13.6892	23.6336
Australia/Stavely belt				0.00231		8.91	2.68	4.76	0.34	0.00944937	0.00516616	0.0156025	0.344014	0.188079	0.568023
Australia/Stavely belt				0.001126		14.22	2.63	4.98	0.33	0.298223	0.208957	0.389483	10.8571	7.6073	14.1795
Australia/Stavely belt				0.000749		11.47	2.58	3.91	0.32	0.895129	0.678752	1.08494	32.5881	24.7106	39.4982
Australia/Stavely belt				0.00058		10.82	3.16	4.46	0.31	1.4651	1.15099	1.71731	53.3385	41.903	62.5205
Australia/Stavely belt				0.000888		11.04	2.4	3.95	0.33	0.596883	0.439607	0.743642	21.7301	16.0043	27.073
Australia/Stavely belt				0.000934		11.09	4.38	3.81	0.31	0.52197	0.380745	0.656262	19.0028	13.8614	23.8919
Australia/Stavely belt				0.000742		12.26	2.44	4.77	0.32	0.913585	0.693763	1.10577	33.26	25.2571	40.2567
Australia/Stavely belt				0.0011305		13.54	3.48	4.25	0.32	0.294336	0.206039	0.384749	10.7156	7.50107	14.0072
Australia/Stavely belt				0.00066		13.1	3.13	4.26	0.34	1.16031	0.896394	1.38178	42.2423	32.6341	50.3049
Australia/Stavely belt				0.000827		12.55	2.6	3	0.34	0.713058	0.531926	0.877714	25.9596	19.3653	31.954
Australia/Stavely belt				0.00066		11.79	2.47	3.8	0.35	1.16031	0.896394	1.38178	42.2423	32.6341	50.3049
Australia/Stavely belt				0.000594		11.17	2.32	3.62	0.33	1.4065	1.10172	1.65321	51.2052	40.1093	60.1867
Australia/Stavely belt				0.000525		10.52	4.38	5.15	0.32	1.71991	1.36684	1.99415	62.6152	49.7611	72.599
Australia/Stavely belt				0.000747		13.1	3.07	4.35	0.32	0.900364	0.683007	1.09085	32.7786	24.8656	39.7135
Australia/Stavely belt				0.001073		12.18	2.36	4.88	0.33	0.348055	0.246597	0.449818	12.6713	8.97761	16.3761
Australia/Stavely belt				0.00094		10.63	2.78	4.22	0.32	0.512918	0.373673	0.645649	18.6733	13.6039	23.5055
Australia/Stavely belt				0.000796		10.96	2.22	3.2	0.31	0.780506	0.586035	0.954855	28.4151	21.3352	34.7625
Australia/Stavely belt				0.000711		12.94	2.63	4.31	0.32	1	0.764334	1.20296	36.406	27.8264	43.7948
Australia/Stavely belt				0.00077		11.15	4.7	3.63	0.31	0.841969	0.635639	1.02476	30.6527	23.1411	37.3073
Australia/Stavely belt				0.001033		12.62	2.44	3.75	0.34	0.391106	0.279431	0.501467	14.2386	10.173	18.2564
Australia/Stavely belt				0.000895		11.85	2.22	3.72	0.32	0.584825	0.430095	0.72963	21.2911	15.658	26.5629
Australia/Stavely belt				0.000758		13.91	2.75	4.29	0.32	0.871947	0.659928	1.05872	31.7441	24.0253	38.5439
Australia/Stavely belt				0.000827		11.45	2.44	4.51	0.31	0.713058	0.531926	0.877714	25.9596	19.3653	31.954
Australia/Stavely belt				0.000796		11.85	4.38	4.37	0.32	0.780506	0.586035	0.954855	28.4151	21.3352	34.7625
Australia/Stavely belt				0.000729		12.4	2.26	4.42	0.32	0.948875	0.722527	1.14553	34.5447	26.3043	41.7043
Australia/Stavely belt				0.000807		8.21	2.38	4.68	0.4	0.755872	0.566233	0.926736	27.5183	20.6143	33.7387
Australia/Stavely belt				0.000675		7.48	2.78	5.59	0.4	1.11066	0.855345	1.32659	40.4348	31.1397	48.2957
Australia/Stavely belt				0.000923		7.54	2.63	5.45	0.4	0.538981	0.394061	0.676174	19.6221	14.3462	24.6168
Australia/Stavely belt				0.0005932		9.52	2.34	4.88	0.4	1.40979	1.10448	1.65681	51.3248	40.2097	60.3177
Australia/Stavely belt				0.000669		8.72	2.44	3.5	0.39	1.13026	0.871534	1.34839	41.1483	31.7291	49.0896
Australia/Stavely belt				0.000674		9	2.3	5.28	0.39	1.1139	0.858022	1.3302	40.5528	31.2372	48.4271
Australia/Stavely belt				0.0003554		7.66	2.16	5.42	0.39	2.81999	2.32217	3.16163	102.665	84.5407	115.102
Australia/Stavely belt				0.000532		8.48	2.13	5.03	0.39	1.68517	1.33726	1.95658	61.3503	48.6844	71.2311
Australia/Stavely belt				0.000829		10.51	2.24	4.16	0.4	0.708912	0.528612	0.872956	25.8087	19.2447	31.7809
Australia/Stavely belt				0.000629		6.79	2.7	5.18	0.4	1.27006	0.987578	1.50322	46.2379	35.9538	54.7262
Australia/Stavely belt				0.0005347		9.83	2.68	4.95	0.39	1.67196	1.32603	1.94227	60.8692	48.2754	70.7104
Australia/Stavely belt				0.000237		10.32	2.94	4.86	0.41	3.98256	3.36188	4.36154	144.989	122.393	158.786
Australia/Stavely belt				0.000891		9	2.47	4.98	0.39	0.591685	0.435505	0.737604	21.5409	15.855	26.8532
Australia/Stavely belt				0.000827		7.78	2.32	5.35	0.39	0.713058	0.531926	0.877714	25.9596	19.3653	31.954
Australia/Stavely belt				0.000553		6.25	3.36	5.48	0.39	1.58509	1.25232	1.84805	57.7068	45.5921	67.2801
Australia/Stavely belt				0.0009192		9.2	2.22	5.51	0.39	0.544985	0.398768	0.683193	19.8407	14.5176	24.8723
Australia/Stavely belt				0.000467		7.83	2.22	5.08	0.4	2.03678	1.63845	2.33457	74.151	59.6494	84.9922
Australia/Stavely belt				0.000515		7.89	2.21	5.26	0.4	1.77079	1.41023	2.04908	64.4676	51.3407	74.5988
Australia/Stavely belt				0.001039		6.76	2.42	5.27	0.39	0.384324	0.27424	0.493357	13.9917	9.984	17.9612
Australia/Stavely belt				0.000485		6.87	2.6	4.84	0.4	1.93265	1.54883	2.22312	70.3601	56.3867	80.935
Australia/Stavely belt				0.0004623		8.36	2.17	5.14	0.4	2.06488	1.66269	2.36457	75.1741	60.5319	86.0847
Australia/Stavely belt				0.000503		7.57	2.17	5.29	0.39	1.83384	1.46411	2.117	66.7629	53.3025	77.0715
Australia/Stavely belt				0.000459		9.11	2.19	5.15	0.4	2.08484	1.67993	2.38587	75.9008	61.1594	86.8601
Australia/Stavely belt				0.00245		8.13	4.38	4.63	0.39	0.0062826	0.00333553	0.0106653	0.228724	0.121433	0.38828
Australia/Stavely belt				0.00129		8.17	5.36	4.56	0.37	0.18488	0.125165	0.249428	6.73075	4.55675	9.08066
Australia/Stavely belt				0.001315		7.45	5.36	4.82	0.37	0.171884	0.115758	0.233045	6.25762	4.2143	8.48425
Australia/Stavely belt				0.00153		7.45	3.05	4.59	0.39	0.0918356	0.0591236	0.12993	3.34337	2.15245	4.73022
Australia/Stavely belt				0.00156		9.81	3.84	4.73	0.38	0.0841446	0.0538327	0.119758	3.06337	1.95983	4.35991
Australia/Stavely belt				0.001615		4.87	4.7	4.25	0.38	0.0716782	0.0453316	0.103133	2.60952	1.65034	3.75465
Australia/Stavely belt				0.001678		8.75	4.38	4.22	0.38	0.0596511	0.0372306	0.0869054	2.17166	1.35542	3.16388
Australia/Stavely belt				0.00184		8.69	3.42	4.51	0.39	0.0371963	0.0224408	0.0559581	1.35417	0.816979	2.03721
Australia/Stavely belt				0.00205		8.87	2.88	5.83	0.35	0.0201653	0.0116421	0.0316251	0.734139	0.423843	1.15134
Australia/Stavely belt				0.00164		7.52	3.63	4.51	0.34	0.0666397	0.0419249	0.0963591	2.42608	1.52632	3.50805
Australia/Stavely belt				0.001981		7.44	3.3	4.74	0.37	0.0246587	0.0144437	0.0381471	0.897726	0.525836	1.38878
Australia/Stavely belt				0.001587		8.88	3.16	4.45	0.35	0.077775	0.0494769	0.111286	2.83147	1.80125	4.05148
Australia/Stavely belt				0.0017		6.19	3.9	4.63	0.35	0.0559452	0.034757	0.0818622	2.03674	1.26536	2.98028
Australia/Stavely belt				0.00281		4.83	4.7	4.44	0.34	0.00219948	0.00108289	0.00400977	0.0800743	0.0394236	0.14598
Australia/Stavely belt				0.00138		8.85	4.38	4.34	0.38	0.142212	0.0944793	0.195313	5.17737	3.43961	7.11056
Australia/Stavely belt				0.00213		8.56	3.16	4.23	0.38	0.0159703	0.0090669	0.025446	0.581414	0.33009	0.926388
Australia/Stavely belt				0.002115		8.64	3.36	5.36	0.38	0.0166842	0.00950203	0.0265047	0.607404	0.345931	0.964929
Australia/Stavely belt				0.00082		7.58	2.36	4.1	0.34	0.72776	0.543691	0.894569	26.4948	19.7936	32.5677
Australia/Stavely belt				0.000915		7.34	2.6	3.74	0.33	0.551699	0.404037	0.691035	20.0852	14.7094	25.1578
Australia/Stavely belt				0.000637		7.32	2.3	4.17	0.35	1.24078	0.963194	1.47089	45.172	35.0661	53.5493
Australia/Stavely belt				0.000622		7.72	2.83	3.74	0.34	1.29625	1.00942	1.53209	47.1913	36.7489	55.7771
Australia/Stavely belt				0.000684		8.3	2.73	3.69	0.34	1.0819	0.831624	1.29454	39.3876	30.2761	47.1289
Australia/Stavely belt				0.000617		7.65	2.4	3.93	0.34	1.31528	1.02532	1.55304	47.8842	37.3276	56.5401
Australia/Stavely belt				0.000514		6.58	2.26	4.26	0.34	1.77597	1.41464	2.05466	64.6558	51.5014	74.8018
Australia/Stavely belt				0.00058		6.07	2.28	3.86	0.33	1.4651	1.15099	1.71731	53.3385	41.903	62.5205
Australia/Stavely belt				0.000721		9.21	2.47	3.83	0.34	0.971266	0.740818	1.17071	35.3599	26.9702	42.6208
Australia/Stavely belt				0.000572		7.52	2.4	3.89	0.34	1.49967	1.18013	1.75505	54.5971	42.9638	63.8945
Australia/Stavely belt				0.000588		7.69	2.42	3.73	0.34	1.43132	1.12257	1.68038	52.1088	40.8685	61.176
Australia/Stavely belt				0.000539		7.89	2.47	3.67	0.34	1.65113	1.30833	1.91971	60.1109	47.631	69.8889
Australia/Stavely belt				0.000643		5.23	3.1	4.53	0.34	1.21927	0.945303	1.44711	44.3887	34.4147	52.6833
Australia/Stavely belt				0.0006172		6.48	2.34	3.87	0.34	1.31452	1.02467	1.5522	47.8563	37.3043	56.5094
Australia/Stavely belt				0.000578		7.02	2.21	4.18	0.34	1.47367	1.15821	1.72667	53.6504	42.1658	62.8612
Australia/Stavely belt				0.00071		6.52	2.38	4.39	0.35	1.00292	0.766727	1.20623	36.5123	27.9134	43.914
Australia/Stavely belt				0.000685		6.85	2.22	4.09	0.33	1.07875	0.829029	1.29102	39.2729	30.1816	47.001
Australia/Stavely belt				0.000931		7.44	2.44	4.29	0.35	0.526555	0.384331	0.661634	19.1698	13.992	24.0874
Australia/Stavely belt				0.000681		7.31	2.7	3.73	0.34	1.0914	0.839457	1.30513	39.7336	30.5613	47.5146
Australia/Stavely belt				0.000741		6.16	4.06	4.49	0.35	0.916252	0.695934	1.10878	33.3571	25.3362	40.3663
Australia/Stavely belt				0.00062		8.92	2.17	4.27	0.36	1.30383	1.01575	1.54044	47.4672	36.9793	56.0811
Australia/Stavely belt				0.001826		11.8	0.96	4.18	0.27	0.038746	0.0234444	0.0581279	1.41059	0.853516	2.11621
Australia/Stavely belt				0.0013		11.37	0.88	4.37	0.29	0.179568	0.121314	0.242741	6.53735	4.41655	8.83722
Australia/Stavely belt				0.001278		11.53	1.04	4.14	0.37	0.191463	0.129947	0.257695	6.9704	4.73087	9.38165
Australia/Stavely belt				0.000845		12.42	0.73	3.72	0.39	0.676603	0.502832	0.835815	24.6324	18.3061	30.4287
Australia/Stavely belt				0.003167		10.51	0.76	3.81	0.39	0.000776783	0.000354873	0.00151987	0.0282796	0.0129195	0.0553324
Australia/Stavely belt				0.001634		11.42	0.86	3.87	0.25	0.0678157	0.0427184	0.097943	2.4689	1.55521	3.56571
Australia/Stavely belt				0.00084		10.78	0.85	4.5	0.48	0.686538	0.51075	0.847249	24.9941	18.5944	30.8449
Australia/Stavely belt				0.00055		10.97	0.79	3.94	0.27	1.59901	1.26412	1.86318	58.2137	46.0215	67.8308
Australia/Stavely belt				0.000954		10.7	0.75	3.37	0.4	0.492404	0.357677	0.621547	17.9265	13.0216	22.628
Australia/Stavely belt				0.001094		11.66	0.78	3.51	0.32	0.327385	0.230934	0.424867	11.9188	8.40737	15.4677
Australia/Stavely belt				0.002161		12.02	0.81	4.04	0.37	0.0145902	0.00822975	0.0233903	0.531171	0.299612	0.851546
Australia/Stavely belt				0.001056		11.68	0.85	3.69	0.37	0.365741	0.260052	0.471085	13.3152	9.46744	17.1503
Australia/Stavely belt				0.000829		13.03	0.69	3.18	0.26	0.708912	0.528612	0.872956	25.8087	19.2447	31.7809
Australia/Stavely belt				0.001048		11.57	0.91	3.98	0.48	0.374371	0.266635	0.481438	13.6294	9.70711	17.5272
Australia/Stavely belt				0.000849		11.04	0.95	3.58	0.3	0.668758	0.496585	0.826779	24.3468	18.0787	30.0997
Australia/Stavely belt				0.00199		11.55	0.97	3.26	0.35	0.0240201	0.0140431	0.0372255	0.874477	0.511253	1.35523
Australia/Stavely belt				0.001526		10.78	0.9	3.83	0.27	0.0929129	0.0598673	0.13135	3.38259	2.17953	4.78192
Australia/Stavely belt				0.001137		10.57	1.06	3.44	0.33	0.288811	0.201897	0.378013	10.5145	7.35024	13.7619
Australia/Stavely belt				0.001406		11.86	0.69	2.99	0.4	0.13183	0.0871064	0.18199	4.79942	3.1712	6.62552
Australia/Stavely belt				0.000936		10.82	0.76	3	0.34	0.518935	0.378373	0.652705	18.8923	13.775	23.7624
Australia/Stavely belt				0.001709		9.19	0.75	3.51	0.31	0.0544964	0.0337931	0.0798845	1.984	1.23027	2.90827
Australia/Stavely belt				0.002314		9.92	1.12	4.13	0.26	0.00933981	0.00510199	0.0154338	0.340025	0.185743	0.561883
Australia/Stavely belt				0.001669		9.66	1.12	2.95	0.37	0.061237	0.0382925	0.089057	2.2294	1.39408	3.24221
Australia/Stavely belt				0.002086		11.32	1.26	4.79	0.22	0.0181561	0.0104034	0.0286778	0.660993	0.378745	1.04405
Australia/Stavely belt				0.0011		12.2	1.68	4.73	0.23	0.321708	0.226644	0.417996	11.7121	8.2512	15.2176
Australia/Stavely belt				0.002668		10.21	1.13	4.76	0.19	0.00332748	0.00168772	0.00589794	0.12114	0.0614432	0.21472
Australia/Stavely belt				0.001984		11.05	1.34	4.82	0.19	0.024444	0.0143089	0.0378374	0.889908	0.520929	1.37751
Australia/Stavely belt				0.001762		11.02	0.95	4.75	0.19	0.046694	0.028635	0.0691695	1.69994	1.04249	2.51818
Australia/Stavely belt				0.001377		8.99	1.21	4.81	0.19	0.143461	0.0953692	0.196912	5.22285	3.47201	7.16877
Australia/Stavely belt				0.00074		10.97	1.32	5.05	0.23	0.918927	0.698113	1.1118	33.4545	25.4155	40.4761
Australia/Stavely belt				0.002274		11.07	0.8	4.79	0.18	0.0104951	0.00578131	0.017206	0.382083	0.210474	0.6264
Australia/Stavely belt				0.002505		10.6	1.08	4.43	0.18	0.00535181	0.00280879	0.00918469	0.194838	0.102257	0.334378
Australia/Stavely belt				0.000835		10.32	1.39	4.92	0.19	0.696619	0.518793	0.858839	25.3611	18.8872	31.2669
Australia/Stavely belt						11.26	1.07	4.66	0.23	7.94773	7.05069	8.30492	289.345	256.687	302.349
