# Supplementary material
Source: Research Square preprint supplement (doi:10.21203/rs.3.rs-10142139/v1)
Supplement: Supplementary file 5 [file f3437f80dd3406d8ecb0eeb7.xlsx]

## Sheet: Table S1
Table S1. Identified low-δ¹⁸O magmatic events in the global zircon δ¹⁸O record and their Event Severity Index values
Rank	Event ID	Younger age (Ma)	Older age (Ma)	Event range (Ma)	Duration (Ma)	Total bins (n)	Valid bins (n)	Positive bins (n)	Total analyses (n)	nδ18O < 5.3‰)	n(δ18O < 4.7‰)	Ratio < 5.3‰	Ratio < 4.7‰	Mean P(<5.3‰)	Mean P(<4.7‰)	Minimum δ18O (‰)	Mean δ18O (‰)	Median δ18O (‰)	Curve area <4.7‰ (‰·Ma)	Curve area <5.3‰ (‰·Ma)	Raw area <4.7‰ (‰·Ma)	Raw area <5.3‰ (‰·Ma)	ESI
1	3	680	920	920-680	240	12	12	11	757	274	174	0.361955	0.229855	0.340663	0.220352	5.25	6.05833	6.3025	0	1.6	57.832	97.327	71.1249
2	1	120	220	220-120	100	5	5	4	795	167	102	0.210063	0.128302	0.237617	0.166254	5.45	6.501	6.275	0	0	37.6298	49.8047	42.4577
3	10	3820	3960	3960-3820	140	7	7	5	76	21	10	0.276316	0.131579	0.283999	0.134077	5.5	5.91143	5.9	0	0	36.9852	52.5961	41.8516
4	2	260	380	380-260	120	6	6	4	538	101	79	0.187732	0.14684	0.178548	0.121443	6.15	6.8875	6.7275	0	0	21.4906	32.2518	24.6463
5	9	3620	3760	3760-3620	140	7	6	4	63	12	8	0.190476	0.126984	0.178451	0.119318	5.75	5.8875	5.895	0	0	17.0879	27.5268	19.2578
6	7	2920	3020	3020-2920	100	5	5	4	48	23	7	0.479167	0.145833	0.527015	0.160531	5	5.56	5.7	0	8	13.8599	34.5881	15.8811
7	4	1660	1800	1800-1660	140	7	7	5	316	69	37	0.218354	0.117089	0.210971	0.115664	6.195	7.16286	7.43	0	0	12.2114	25.9433	13.6412
8	6	2740	2820	2820-2740	80	4	4	4	122	55	16	0.45082	0.131148	0.441889	0.12605	5.26	5.34625	5.3	0	0.8	9.12121	22.3037	10.3174
9	5	2280	2360	2360-2280	80	4	4	3	94	15	10	0.159574	0.106383	0.15186	0.106473	6.145	6.415	6.4875	0	0	7.89887	14.2432	8.73917
10	8	3080	3160	3160-3080	80	4	4	3	45	11	5	0.244444	0.111111	0.160714	0.0982143	5.6	6.14375	6.2225	0	0	6.40476	13.119	7.1164
