# Supplementary material
Source: Research Square preprint supplement (doi:10.21203/rs.3.rs-10142139/v1)
Supplement: Supplementary file 6 [file f47368e0d476ccb983125dc6.xlsx]

## Sheet: Sheet2
Table S6 Zircon Lu-Hf isotope and O isotope data
Sample	t (Ma)	176Yb/177Hf	176Lu/177Hf	176Hf/177Hf	2σ	fLu/Hf	(176Hf/177Hf)i	εHf(t)	1σ	TDM1 (Ga)	TDM2 (Ga)	TDMC (Ga)	δ18O (‰)	2σ
LZX@01	755.4	0.0420719	0.00172517	0.282438	2.91593e-05	-0.948037	0.282414	3.98689	1.02057	1.17423	1.40903	1.42188	4.21352	0.167879
LZX@02	750.3	0.042959	0.00181391	0.282431	2.81759e-05	-0.945364	0.282405	3.57672	0.986156	1.1875	1.43095	1.44411	3.73925	0.192102
LZX@03	798.3	0.0289477	0.00120601	0.282475	2.6761e-05	-0.963674	0.282457	6.47575	0.936633	1.10592	1.28515	1.29599	4.06933	0.130641
LZX@04	736	0.0816513	0.00326442	0.282385	3.00682e-05	-0.901674	0.28234	0.95507	1.05239	1.30373	1.58494	1.60012	4.12334	0.167088
LZX@05	731.4	0.0531411	0.0022627	0.28254	3.52376e-05	-0.931846	0.282509	6.83254	1.23332	1.04326	1.21098	1.2211	4.03762	0.157757
LZX@06	735.8	0.0296135	0.00121866	0.282452	2.47925e-05	-0.963293	0.282435	4.3151	0.867737	1.13873	1.37327	1.38566	3.83739	0.153467
LZX@07	734.9	0.0592495	0.0023815	0.28246	3.02512e-05	-0.928268	0.282427	3.99828	1.05879	1.16395	1.39254	1.4052	5.8017	0.153779
LZX@08	789.8	0.0383726	0.00159165	0.282435	3.40819e-05	-0.952059	0.282412	4.69069	1.19287	1.17373	1.39114	1.40365	3.9499	0.162244
LZX@09	741.2	0.0362392	0.00153507	0.282452	3.07419e-05	-0.953763	0.282431	4.27275	1.07597	1.14848	1.38009	1.39256	4.07082	0.158884
LZX@10	751.8	0.0346149	0.00144881	0.282438	2.9244e-05	-0.956361	0.282417	4.04287	1.02354	1.16579	1.40273	1.4155	4.13771	0.169325
LZX@11	749.1	0.0576084	0.00235804	0.282406	3.56043e-05	-0.928975	0.282373	2.42319	1.24615	1.24041	1.50265	1.51678	4.32351	0.184018
LZX@12	740.7	0.0484521	0.00198967	0.282411	2.8775e-05	-0.94007	0.282383	2.59474	1.00712	1.22135	1.48542	1.49931	4.17091	0.147017
LZX@13	739.9	0.0321349	0.00134634	0.282396	2.91534e-05	-0.959448	0.282378	2.37332	1.02037	1.2212	1.49877	1.5128	4.03811	0.132311
LZX@14	737	0.0546204	0.00220196	0.282436	2.63427e-05	-0.933676	0.282405	3.28658	0.921993	1.19273	1.439	1.45228	4.05149	0.157378
LZX@15	751.8	0.0320355	0.00133466	0.282443	3.11075e-05	-0.959799	0.282424	4.29116	1.08876	1.1546	1.38709	1.39963	4.41169	0.176687
LZX@16	737.7	0.0367127	0.00150901	0.28245	2.79501e-05	-0.954548	0.282429	4.13814	0.978255	1.15061	1.38589	1.39844	4.21748	0.200546
LZX@17	740.1	0.0461572	0.00188822	0.28242	2.81503e-05	-0.943126	0.282394	2.93788	0.985262	1.20561	1.46335	1.47695	3.8483	0.141658
LZX@18	717.1	0.0671447	0.00268642	0.282528	3.21917e-05	-0.919084	0.282492	5.90901	1.12671	1.07318	1.25828	1.26914	4.63507	0.161593
LZX@19	734.2	0.04045	0.00169433	0.28249	3.04207e-05	-0.948966	0.282467	5.39286	1.06472	1.09904	1.30405	1.31549	3.88448	0.178577
LZX@20	724.2	0.0566244	0.00227012	0.282508	2.73357e-05	-0.931623	0.282477	5.54795	0.956751	1.08996	1.28655	1.29778	3.83194	0.158879
WJG@01	711.7	0.015012	0.000634028	0.282338	2.91619e-05	-0.980903	0.282329	0.0366904	1.02067	1.27959	1.62425	1.63963	4.46044	0.156744
WJG@02	690.4	0.02449	0.00103292	0.28237	3.05483e-05	-0.968888	0.282357	0.54312	1.06919	1.24744	1.57608	1.59084	5.11634	0.174563
WJG@03	713.9	0.029988	0.00124784	0.282367	3.17118e-05	-0.962415	0.28235	0.807056	1.10991	1.26014	1.57743	1.59234	4.66732	0.13002
WJG@04	722.1	0.02446	0.00102191	0.282401	3.26226e-05	-0.96922	0.282387	2.30675	1.14179	1.20449	1.48932	1.50319	4.546	0.170735
WJG@05	711.1	0.0265515	0.00107769	0.282346	2.79545e-05	-0.967539	0.282332	0.111948	0.978406	1.28281	1.61903	1.63438	5.03961	0.161731
WJG@06	712.3	0.0203066	0.00081144	0.28246	2.64131e-05	-0.975559	0.282449	4.29484	0.924457	1.11507	1.35648	1.36867	4.85395	0.171604
WJG@07	706.8	0.0291692	0.00118864	0.282405	3.23915e-05	-0.964197	0.282389	2.03034	1.1337	1.20459	1.49499	1.5089	5.14703	0.164139
WJG@08	717	0.03484	0.0013559	0.282343	3.34394e-05	-0.95916	0.282325	-0.000883792	1.17038	1.2966	1.63062	1.64615	4.57861	0.146222
WJG@09	720.1	0.0224865	0.000911614	0.282325	2.45222e-05	-0.972542	0.282313	-0.375567	0.858276	1.30718	1.65657	1.67238	5.26335	0.183454
WJG@10	719.8	0.0263151	0.00110688	0.2824	3.09683e-05	-0.96666	0.282385	2.20256	1.08389	1.20776	1.49411	1.50805	5.13564	0.158399
WJG@11	717.3	0.0267916	0.00112246	0.282421	2.96939e-05	-0.966191	0.282406	2.85817	1.03928	1.17979	1.4509	1.46429	4.8277	0.143665
WJG@12	709.3	0.0182176	0.00076634	0.282322	2.5716e-05	-0.976917	0.282312	-0.631647	0.90006	1.30577	1.66443	1.68024	4.95149	0.166437
WJG@13	713.1	0.0229571	0.000920348	0.282416	2.63428e-05	-0.972279	0.282403	2.68598	0.921997	1.18052	1.45853	1.47201	4.93218	0.124318
WJG@14	722.7	0.0441596	0.00174158	0.282325	2.72069e-05	-0.947543	0.282302	-0.699561	0.95224	1.33565	1.67886	1.69499	4.85098	0.187542
WJG@15	723.5	0.0342055	0.00138215	0.282411	2.78201e-05	-0.958369	0.282393	2.53862	0.973702	1.20109	1.47578	1.4895	4.47865	0.139793
WJG@16	718.5	0.0291939	0.00121203	0.282306	3.16709e-05	-0.963493	0.282289	-1.23053	1.10848	1.34449	1.70905	1.72544	5.07129	0.144398
WJG@17	715.4	0.028821	0.00121925	0.282374	2.97742e-05	-0.963276	0.282358	1.12592	1.0421	1.24832	1.55852	1.57321	5.26384	0.14261
WJG@18	718.4	0.0318333	0.00130332	0.28234	2.4562e-05	-0.960743	0.282323	-0.049924	0.85967	1.29893	1.63477	1.65036	4.71975	0.141821
WJG@19	721.9	0.0287474	0.00112578	0.282411	2.64509e-05	-0.966091	0.282396	2.61639	0.925782	1.19336	1.46966	1.48329	4.77819	0.128549
WJG@20	721.7	0.0177585	0.000738102	0.282407	2.44446e-05	-0.977768	0.282397	2.65736	0.85556	1.18675	1.46693	1.48053	4.83365	0.140144
KYX@01	686.8	0.0277741	0.00117471	0.28253	3.57368e-05	-0.964617	0.282515	6.05071	1.25079	1.02719	1.22597	1.2365	4.64894	0.125256
KYX@02	692.4	0.0218914	0.000937064	0.282419	3.46106e-05	-0.971775	0.282407	2.3457	1.21137	1.17651	1.46409	1.47759	5.00396	0.125643
KYX@03	691	0.0287349	0.00117747	0.282476	3.38501e-05	-0.964534	0.282461	4.22062	1.18475	1.10378	1.34478	1.35683	5.14653	0.161037
KYX@04	674.8	0.040656	0.00157383	0.282305	3.59151e-05	-0.952596	0.282285	-2.36869	1.25703	1.35916	1.74721	1.76361	4.81186	0.159877
KYX@05	692.6	0.0429184	0.00175522	0.282422	3.08391e-05	-0.947132	0.282399	2.07207	1.07937	1.19849	1.48146	1.49519	4.89554	0.151321
KYX@06	700.4	0.0264936	0.00110889	0.282471	3.57628e-05	-0.9666	0.282456	4.27856	1.2517	1.10875	1.34835	1.36045	7.6718	0.228704
KYX@07	269.3	0.026128	0.00109211	0.282936	3.14219e-05	-0.967105	0.28293	11.5067	1.09976	0.450079	0.556282	0.560963	5.16831	0.1758
KYX@08	685.8	0.0297599	0.00125521	0.282372	3.12735e-05	-0.962192	0.282356	0.390781	1.09457	1.2529	1.58214	1.59695	4.25167	0.103201
KYX@09	738.6	0.0309818	0.0013129	0.282352	3.15557e-05	-0.960455	0.282334	0.779702	1.10445	1.28321	1.59805	1.61331	4.84206	0.11943
KYX@10	694.2	0.0252236	0.0010611	0.282494	3.40423e-05	-0.968039	0.28248	4.99481	1.19148	1.07447	1.29837	1.30983	4.24969	0.147687
KYX@11	682.7	0.0270096	0.00112294	0.282462	3.90023e-05	-0.966177	0.282447	3.57115	1.36508	1.12192	1.37938	1.39186	8.34258	0.111698
KYX@12	686.7	0.0387206	0.00150194	0.282452	3.71583e-05	-0.954761	0.282433	3.1523	1.30054	1.14665	1.40886	1.42171	4.77175	0.144206
KYX@13	292.5	0.0570746	0.00223104	0.282925	3.7281e-05	-0.9328	0.282913	11.4166	1.30483	0.479323	0.58005	0.584849	7.40464	0.201848
KYX@14	691.1	0.0312875	0.0012782	0.282463	3.9579e-05	-0.9615	0.282447	3.73205	1.38526	1.12449	1.37568	1.38812	7.80708	0.163828
KYX@15	673.1	0.0147602	0.000614202	0.282357	3.40736e-05	-0.9815	0.282349	-0.113784	1.19258	1.25225	1.60422	1.61914	0.839689	0.142489
KYX@16	689.9	0.0237718	0.00100485	0.282407	2.98041e-05	-0.969733	0.282394	1.84459	1.04314	1.19509	1.49375	1.50758	7.85299	0.153656
KYX@17	656.2	0.029373	0.00123334	0.282475	3.44851e-05	-0.962851	0.28246	3.4358	1.20698	1.10601	1.36757	1.37987	5.1401	0.163235
KYX@18	684.8	0.0503957	0.00197928	0.282485	3.82581e-05	-0.940383	0.282459	4.03662	1.33903	1.11505	1.35161	1.36376	4.88167	0.132844
KYX@19	689.7	0.0290656	0.00117629	0.282412	3.4647e-05	-0.96457	0.282396	1.91668	1.21264	1.19437	1.48905	1.50284	8.09337	0.156316
KYX@20	680.9	0.0211287	0.000905497	0.282514	3.48254e-05	-0.972726	0.282503	5.48967	1.21889	1.04193	1.25688	1.26782	5.13762	0.219761
BK@01	789.159	0.0243452	0.00116779	0.282454	3.0186e-05	-0.964826	0.282437	5.57403	1.05651	1.13368	1.33497	1.34664	3.99795	0.155971
BK@02	778.705	0.0055458	0.000276602	0.282488	2.58453e-05	-0.991669	0.282484	7.01431	0.904586	1.06064	1.23603	1.24623	4.80527	0.298355
BK@03	772.186	0.00318866	0.000172361	0.282504	2.66669e-05	-0.994808	0.282502	7.4878	0.933341	1.03588	1.20109	1.21079	4.84425	0.31128
BK@04	1250.47	0.011027	0.000511626	0.282381	2.88993e-05	-0.98459	0.282369	13.4841	1.01148	1.21599	1.19489	1.19561	4.70772	0.264612
BK@05	776.618	0.0200649	0.000980226	0.282561	4.43385e-05	-0.970475	0.282547	9.17693	1.55185	0.978314	1.09776	1.10576	4.3761	0.177708
BK@06	1019.75	0.0215529	0.00104289	0.282505	3.81366e-05	-0.968588	0.282485	12.4173	1.33478	1.05892	1.08201	1.08576	4.46054	0.223334
BK@07	816.541	0.00940628	0.000453508	0.28246	2.62786e-05	-0.98634	0.282453	6.74541	0.919752	1.10496	1.28222	1.29289	4.61733	0.286986
BK@08	777.857	0.0123056	0.000599231	0.282426	3.12967e-05	-0.981951	0.282418	4.63342	1.09538	1.1557	1.38557	1.39802	4.21023	0.188925
BK@09	749.216	0.0149192	0.000714246	0.282383	3.08489e-05	-0.978487	0.282373	2.3982	1.07971	1.22015	1.50436	1.51847	4.61155	0.279281
BK@10	757.395	0.00785647	0.000391639	0.282397	3.01662e-05	-0.988204	0.282392	3.25632	1.05582	1.18976	1.45661	1.47008	4.42406	0.156777
BK@11	753.287	0.0163336	0.000780105	0.282482	3.00619e-05	-0.976503	0.282471	5.98385	1.05217	1.08325	1.28146	1.2925	4.58629	0.160042
BK@12	770.489	0.00817578	0.000412006	0.282435	2.70515e-05	-0.98759	0.282429	4.86563	0.946801	1.13847	1.36526	1.37744	5.24995	0.135002
BK@13	757.235	0.0347039	0.00162245	0.282435	3.45818e-05	-0.951131	0.282411	3.95437	1.21036	1.17593	1.41249	1.42538	5.02031	0.0870082
BK@14	756.44	0.0102978	0.000504185	0.282409	2.97414e-05	-0.984814	0.282402	3.61116	1.04095	1.17636	1.43352	1.44669	4.84676	0.124476
BK@15	728.288	0.0142932	0.000663744	0.282425	3.31002e-05	-0.980008	0.282416	3.46645	1.15851	1.15972	1.42101	1.43402	4.99361	0.104699
BK@16	733.445	0.00875701	0.000411544	0.282419	2.86326e-05	-0.987604	0.282413	3.49448	1.00214	1.16019	1.42321	1.43624	4.89867	0.123957
BK@17	702.764	0.00829704	0.000402749	0.282438	2.6941e-05	-0.987869	0.282433	3.50539	0.942934	1.13338	1.39895	1.41167	4.73799	0.122673
BK@18	818.934	0.00535101	0.000270946	0.282389	2.55617e-05	-0.991839	0.282385	4.38886	0.894659	1.1972	1.43259	1.4456	4.67144	0.111922
BK@19	688.591	0.0231724	0.00100518	0.282487	3.6499e-05	-0.969723	0.282474	4.64781	1.27746	1.08288	1.31597	1.32765	5.08937	0.116271
BK@20	673.237	0.00640885	0.000312526	0.282425	2.67114e-05	-0.990587	0.282421	2.42086	0.934901	1.14928	1.44468	1.45788	4.71471	0.0979534
